# Supplementary material for: hnRNP A1 and hnRNP F Modulate the Alternative Splicing of Exon 11 of the Insulin Receptor Gene
Source: PubMed Central journal article supplement (PMC3223206; doi:10.1371/journal.pone.0027869), 2011-11-23
Supplement: pone.0027869.s001.pdf [file pone.0027869.s001.pdf]

**Results from Mass Spectrometry Analysis of RNA Affinity Purification run by Dr. John Yates  
at the YRC at Scripps Research Institute, La Jolla CA.**

|                                                           |         |
|-----------------------------------------------------------|---------|
| MudPIT Mass Spectrometry data for IE3 (Sample: wt1)       | page 2  |
| MudPIT Mass Spectrometry data for IE3 mutant (Sample: m1) | page 19 |

Recent pages: [View MS Run \(Yates\)](#) -> [Collaboration Details](#) -> [View MS Run \(Yates\)](#) -> [Collaboration Details](#) -> **[View MS Run \(Yates\)](#)**

## View Mass Spectrometry Run

### Run Information:

Organism: [Homo sapiens](#)  
 Run Date: 2008-03-11  
 Project: [Mechanism of alternative splicing of human insulin receptor](#)  
 DTA SELECT: [Download DTASelect Filter text](#)  
               [Download DTASelect HTML file](#)  
               [Download Unfiltered DTASelect text file](#)  
 Comments: RNA binding splicing regulatory proteins sample: wt1  
[\[Edit Comments\]](#)

### FILTERED Run Results: [\[unfilter\]](#)

|                                 | <u>Hit Protein</u>        | <u>Protein Desc</u>                                       | <u>Sequence Count</u> | <u>Spectrum Count</u> | <u>Sequence Coverage</u> | <u>Mol. Wt.</u> |
|---------------------------------|---------------------------|-----------------------------------------------------------|-----------------------|-----------------------|--------------------------|-----------------|
| <a href="#">[View Peptides]</a> | <a href="#">RPLP2</a>     | ribosomal protein, large, P2                              | 5                     | 10                    | 67.8%                    | 11665           |
| <a href="#">[View Peptides]</a> | <a href="#">HNRPH3</a>    | heterogeneous nuclear ribonucleoprotein H3 (2H9)          | 11                    | 22                    | 55.8%                    | 36926           |
| <a href="#">[View Peptides]</a> | <a href="#">NONO</a>      | non-POU domain containing, octamer-binding                | 62                    | 663                   | 54.8%                    | 54232           |
| <a href="#">[View Peptides]</a> | <a href="#">HNRNPA2B1</a> | heterogeneous nuclear ribonucleoprotein A2/B1             | 15                    | 53                    | 52.1%                    | 37430           |
| <a href="#">[View Peptides]</a> | <a href="#">SEPT2</a>     | septin 2                                                  | 17                    | 75                    | 50.4%                    | 41487           |
| <a href="#">[View Peptides]</a> | <a href="#">GTF2I</a>     | general transcription factor II, i                        | 62                    | 358                   | 47.0%                    | 112416          |
| <a href="#">[View Peptides]</a> | <a href="#">HNRPH1</a>    | heterogeneous nuclear ribonucleoprotein H1 (H)            | 23                    | 355                   | 46.8%                    | 49229           |
| <a href="#">[View Peptides]</a> | <a href="#">HNRPF</a>     | heterogeneous nuclear ribonucleoprotein F                 | 18                    | 162                   | 45.8%                    | 45672           |
| <a href="#">[View Peptides]</a> | <a href="#">SNRPD2</a>    | small nuclear ribonucleoprotein D2 polypeptide 16.5kDa    | 5                     | 22                    | 44.9%                    | 13527           |
| <a href="#">[View Peptides]</a> | <a href="#">HNRPH2</a>    | heterogeneous nuclear ribonucleoprotein H2 (H')           | 19                    | 80                    | 43.9%                    | 49264           |
| <a href="#">[View Peptides]</a> | <a href="#">SEPT9</a>     | septin 9                                                  | 24                    | 113                   | 42.2%                    | 65369           |
| <a href="#">[View Peptides]</a> | <a href="#">SEPT7</a>     | septin 7                                                  | 15                    | 66                    | 42.1%                    | 50680           |
| <a href="#">[View Peptides]</a> | <a href="#">PAC3IN3</a>   | protein kinase C and casein kinase substrate in neurons 3 | 19                    | 76                    | 41.0%                    | 48487           |
| <a href="#">[View Peptides]</a> | <a href="#">ACTB</a>      | actin, beta                                               | 19                    | 111                   | 40.8%                    | 41737           |

|                                 |                                      |                                                                                                         |     |     |       |        |
|---------------------------------|--------------------------------------|---------------------------------------------------------------------------------------------------------|-----|-----|-------|--------|
| <a href="#">[View Peptides]</a> | <a href="#">SFRS1</a>                | splicing factor, arginine/serine-rich 1 (splicing factor 2, alternate splicing factor)                  | 15  | 109 | 40.7% | 27745  |
| <a href="#">[View Peptides]</a> | <a href="#">SUB1</a>                 | SUB1 homolog (S. cerevisiae)                                                                            | 6   | 10  | 37.0% | 14395  |
| <a href="#">[View Peptides]</a> | <a href="#">SFPO</a>                 | splicing factor proline/glutamine-rich (polypyrimidine tract binding protein associated)                | 51  | 424 | 36.2% | 76150  |
| <a href="#">[View Peptides]</a> | <a href="#">GAPDH</a>                | glyceraldehyde-3-phosphate dehydrogenase                                                                | 9   | 34  | 36.1% | 36053  |
| <a href="#">[View Peptides]</a> | <a href="#">RPS8</a>                 | ribosomal protein S8                                                                                    | 6   | 12  | 35.6% | 24205  |
| <a href="#">[View Peptides]</a> | <a href="#">PARP1</a>                | poly (ADP-ribose) polymerase family, member 1                                                           | 37  | 131 | 34.8% | 113084 |
| <a href="#">[View Peptides]</a> | <a href="#">DDX1</a>                 | DEAD (Asp-Glu-Ala-Asp) box polypeptide 1                                                                | 25  | 125 | 34.5% | 82432  |
| <a href="#">[View Peptides]</a> | <a href="#">PTBP1</a>                | polypyrimidine tract binding protein 1                                                                  | 18  | 42  | 34.1% | 57221  |
| <a href="#">[View Peptides]</a> | <a href="#">RPL30</a>                | ribosomal protein L30                                                                                   | 3   | 6   | 33.9% | 12784  |
| <a href="#">[View Peptides]</a> | <a href="#">KRT10</a>                | keratin 10 (epidermolytic hyperkeratosis; keratosis palmaris et plantaris)                              | 15  | 45  | 33.6% | 59519  |
| <a href="#">[View Peptides]</a> | <a href="#">gi 119594658, gi ...</a> | gi 8980669 gb AAF82266.1 AF229068_1 HSPC170 protein [Homo sapiens], gi 7705477 ref NP_057488.1 hypo...  | 4   | 5   | 32.8% | 14199  |
| <a href="#">[View Peptides]</a> | <a href="#">PRKDC</a>                | protein kinase, DNA-activated, catalytic polypeptide                                                    | 141 | 410 | 32.2% | 469093 |
| <a href="#">[View Peptides]</a> | <a href="#">HNRNPR</a>               | heterogeneous nuclear ribonucleoprotein R                                                               | 17  | 35  | 31.4% | 70943  |
| <a href="#">[View Peptides]</a> | <a href="#">THOC4</a>                | THO complex 4                                                                                           | 9   | 22  | 31.1% | 26888  |
| <a href="#">[View Peptides]</a> | <a href="#">SNRPA1</a>               | small nuclear ribonucleoprotein polypeptide A'                                                          | 5   | 7   | 31.0% | 28416  |
| <a href="#">[View Peptides]</a> | <a href="#">SNRPD3</a>               | small nuclear ribonucleoprotein D3 polypeptide 18kDa                                                    | 3   | 9   | 31.0% | 13916  |
| <a href="#">[View Peptides]</a> | <a href="#">RPLP0</a>                | ribosomal protein, large, P0                                                                            | 11  | 21  | 30.9% | 34274  |
| <a href="#">[View Peptides]</a> | <a href="#">HNRNPU</a>               | heterogeneous nuclear ribonucleoprotein U (scaffold attachment factor A)                                | 23  | 69  | 30.6% | 90480  |
| <a href="#">[View Peptides]</a> | <a href="#">KRT1</a>                 | keratin 1 (epidermolytic hyperkeratosis)                                                                | 28  | 61  | 30.0% | 66018  |
| <a href="#">[View Peptides]</a> | <a href="#">RPL37A</a>               | ribosomal protein L37a                                                                                  | 2   | 5   | 29.3% | 10275  |
| <a href="#">[View Peptides]</a> | <a href="#">gi 545257, gi 21...</a>  | sp P35527 K1CI_HUMAN Keratin, type I cytoskeletal 9 (Cytokeratin 9) (K9) (CK 9) , gi 545257 gb AAC60... | 11  | 26  | 29.1% | 61987  |
| <a href="#">[View Peptides]</a> | <a href="#">HIST1H4L, HIST4H...</a>  | histone cluster 2, H4a, histone cluster 1, H4i, histone cluster 1, H4l, histone cluster 1, H4e, hist... | 3   | 5   | 29.1% | 11367  |
| <a href="#">[View Peptides]</a> | <a href="#">RPL36</a>                | ribosomal protein L36                                                                                   | 5   | 9   | 28.6% | 12254  |
| <a href="#">[View Peptides]</a> | <a href="#">CIRBP</a>                | cold inducible RNA binding protein                                                                      | 8   | 50  | 28.5% | 18648  |
| <a href="#">[View Peptides]</a> | <a href="#">SND1</a>                 | staphylococcal nuclease and tudor domain containing 1                                                   | 24  | 93  | 27.7% | 101997 |
| <a href="#">[View Peptides]</a> | <a href="#">RPL32</a>                | ribosomal protein L32                                                                                   | 3   | 5   | 27.4% | 15860  |
| <a href="#">[View Peptides]</a> | <a href="#">SYNCRIP</a>              | synaptotagmin binding, cytoplasmic RNA interacting protein                                              | 12  | 32  | 27.3% | 69633  |
| <a href="#">[View Peptides]</a> | <a href="#">APOBEC3C</a>             | apolipoprotein B mRNA editing enzyme, catalytic polypeptide-like 3C                                     | 3   | 3   | 26.8% | 22826  |
| <a href="#">[View Peptides]</a> | <a href="#">C14orf166</a>            | chromosome 14 open reading frame 166                                                                    | 7   | 15  | 26.6% | 28068  |
| <a href="#">[View Peptides]</a> | <a href="#">PPP1CA</a>               | protein phosphatase 1, catalytic subunit, alpha isoform                                                 | 6   | 42  | 26.4% | 37512  |
| <a href="#">[View Peptides]</a> | <a href="#">DDX5</a>                 | DEAD (Asp-Glu-Ala-Asp) box polypeptide 5                                                                | 18  | 52  | 26.2% | 69148  |
| <a href="#">[View Peptides]</a> | <a href="#">RPS3</a>                 | ribosomal protein S3                                                                                    | 5   | 9   | 25.9% | 26688  |

|                                 |                                |                                                                                                         |    |     |       |        |
|---------------------------------|--------------------------------|---------------------------------------------------------------------------------------------------------|----|-----|-------|--------|
| <a href="#">[View Peptides]</a> | <a href="#">HNRNPA1</a>        | heterogeneous nuclear ribonucleoprotein A1                                                              | 9  | 25  | 25.8% | 38846  |
| <a href="#">[View Peptides]</a> | <a href="#">RPL7A</a>          | ribosomal protein L7a                                                                                   | 8  | 21  | 25.6% | 29996  |
| <a href="#">[View Peptides]</a> | <a href="#">G3BP1</a>          | GTPase activating protein (SH3 domain) binding protein 1                                                | 11 | 88  | 25.5% | 52164  |
| <a href="#">[View Peptides]</a> | <a href="#">RPL18</a>          | ribosomal protein L18                                                                                   | 6  | 23  | 25.5% | 21634  |
| <a href="#">[View Peptides]</a> | <a href="#">IQGAP1</a>         | IQ motif containing GTPase activating protein 1                                                         | 31 | 71  | 25.3% | 189251 |
| <a href="#">[View Peptides]</a> | <a href="#">gi 41019521</a>    | sp Q9NR30 DD21_HUMAN Nucleolar RNA helicase II (Nucleolar RNA helicase Gu) (RH II/Gu) (DEAD-box prot... | 16 | 38  | 25.2% | 87357  |
| <a href="#">[View Peptides]</a> | <a href="#">CCT8</a>           | chaperonin containing TCP1, subunit 8 (theta)                                                           | 12 | 17  | 25.2% | 59621  |
| <a href="#">[View Peptides]</a> | <a href="#">TUBA1C</a>         | tubulin, alpha 1c                                                                                       | 9  | 24  | 25.2% | 49895  |
| <a href="#">[View Peptides]</a> | <a href="#">NPM1</a>           | nucleophosmin (nucleolar phosphoprotein B23, numatrin)                                                  | 6  | 42  | 25.2% | 32575  |
| <a href="#">[View Peptides]</a> | <a href="#">TUBA1A</a>         | tubulin, alpha 1a                                                                                       | 9  | 24  | 25.1% | 50136  |
| <a href="#">[View Peptides]</a> | <a href="#">EFTUD2</a>         | elongation factor Tu GTP binding domain containing 2                                                    | 16 | 31  | 25.1% | 109436 |
| <a href="#">[View Peptides]</a> | <a href="#">TUBA4A, TUBA1B</a> | tubulin, alpha 1b, tubulin, alpha 4a                                                                    | 9  | 24  | 25.1% | 50152  |
| <a href="#">[View Peptides]</a> | <a href="#">YWHAE</a>          | tyrosine 3-monooxygenase/tryptophan 5-monooxygenase activation protein, epsilon polypeptide             | 5  | 6   | 25.1% | 29174  |
| <a href="#">[View Peptides]</a> | <a href="#">RPL23</a>          | ribosomal protein L23                                                                                   | 2  | 6   | 25.0% | 14865  |
| <a href="#">[View Peptides]</a> | <a href="#">FLNA</a>           | filamin A, alpha (actin binding protein 280)                                                            | 44 | 100 | 24.9% | 280759 |
| <a href="#">[View Peptides]</a> | <a href="#">GRSF1</a>          | G-rich RNA sequence binding factor 1                                                                    | 7  | 11  | 24.8% | 50170  |
| <a href="#">[View Peptides]</a> | <a href="#">RPL12</a>          | ribosomal protein L12                                                                                   | 4  | 7   | 24.8% | 17819  |
| <a href="#">[View Peptides]</a> | <a href="#">SEPT11</a>         | septin 11                                                                                               | 12 | 39  | 24.7% | 49398  |
| <a href="#">[View Peptides]</a> | <a href="#">DYNLL1</a>         | dynein, light chain, LC8-type 1                                                                         | 2  | 2   | 24.7% | 10366  |
| <a href="#">[View Peptides]</a> | <a href="#">ALDOA</a>          | aldolase A, fructose-bisphosphate                                                                       | 6  | 10  | 24.5% | 39420  |
| <a href="#">[View Peptides]</a> | <a href="#">SERBP1</a>         | SERPINE1 mRNA binding protein 1                                                                         | 9  | 40  | 24.5% | 44965  |
| <a href="#">[View Peptides]</a> | <a href="#">TUBB</a>           | tubulin, beta                                                                                           | 9  | 19  | 24.5% | 49671  |
| <a href="#">[View Peptides]</a> | <a href="#">MAP4</a>           | microtubule-associated protein 4                                                                        | 21 | 38  | 24.5% | 121019 |
| <a href="#">[View Peptides]</a> | <a href="#">PSMA7</a>          | proteasome (prosome, macropain) subunit, alpha type, 7                                                  | 4  | 5   | 24.2% | 27887  |
| <a href="#">[View Peptides]</a> | <a href="#">ACTN4</a>          | actinin, alpha 4                                                                                        | 16 | 29  | 24.1% | 104854 |
| <a href="#">[View Peptides]</a> | <a href="#">SEPT10</a>         | septin 10                                                                                               | 9  | 26  | 23.8% | 59982  |
| <a href="#">[View Peptides]</a> | <a href="#">YBX1</a>           | Y box binding protein 1                                                                                 | 4  | 10  | 23.8% | 35924  |
| <a href="#">[View Peptides]</a> | <a href="#">ENO1</a>           | enolase 1, (alpha)                                                                                      | 7  | 12  | 23.5% | 47169  |
| <a href="#">[View Peptides]</a> | <a href="#">YWHAZ</a>          | tyrosine 3-monooxygenase/tryptophan 5-monooxygenase activation protein, zeta polypeptide                | 4  | 7   | 23.3% | 27745  |
| <a href="#">[View Peptides]</a> | <a href="#">PPP1CC</a>         | protein phosphatase 1, catalytic subunit, gamma isoform                                                 | 5  | 41  | 23.2% | 36984  |
| <a href="#">[View Peptides]</a> | <a href="#">HIST1H1D</a>       | histone cluster 1, H1d                                                                                  | 5  | 10  | 23.1% | 22350  |
| <a href="#">[View Peptides]</a> | <a href="#">TUBA4A</a>         | tubulin, alpha 4a                                                                                       | 8  | 16  | 23.0% | 49924  |
| <a href="#">[View Peptides]</a> | <a href="#">FUS</a>            | fusion (involved in t(12;16) in malignant liposarcoma)                                                  | 26 | 185 | 22.8% | 53426  |

|                                 |                                     |                                                                                                        |    |    |       |        |
|---------------------------------|-------------------------------------|--------------------------------------------------------------------------------------------------------|----|----|-------|--------|
| <a href="#">[View Peptides]</a> | <a href="#">PCBP1</a>               | poly(rC) binding protein 1                                                                             | 5  | 13 | 22.8% | 37498  |
| <a href="#">[View Peptides]</a> | <a href="#">SEPT6</a>               | septin 6                                                                                               | 10 | 29 | 22.6% | 49717  |
| <a href="#">[View Peptides]</a> | <a href="#">RFC4</a>                | replication factor C (activator 1) 4, 37kDa                                                            | 6  | 6  | 22.6% | 39682  |
| <a href="#">[View Peptides]</a> | <a href="#">RPL27A</a>              | ribosomal protein L27a                                                                                 | 4  | 5  | 22.3% | 16561  |
| <a href="#">[View Peptides]</a> | <a href="#">CKB</a>                 | creatine kinase, brain                                                                                 | 5  | 6  | 22.3% | 42644  |
| <a href="#">[View Peptides]</a> | <a href="#">CCT2</a>                | chaperonin containing TCP1, subunit 2 (beta)                                                           | 7  | 10 | 22.2% | 57488  |
| <a href="#">[View Peptides]</a> | <a href="#">gi 21619210, gi ...</a> | pir MOHULP myosin regulatory light chain, placental - human , gi 5453740 ref NP_006462.1  myosin re... | 2  | 3  | 22.2% | 19794  |
| <a href="#">[View Peptides]</a> | <a href="#">PKM2</a>                | pyruvate kinase, muscle                                                                                | 7  | 13 | 22.0% | 57937  |
| <a href="#">[View Peptides]</a> | <a href="#">TUBB2C</a>              | tubulin, beta 2C                                                                                       | 8  | 10 | 21.8% | 49831  |
| <a href="#">[View Peptides]</a> | <a href="#">RBM3</a>                | RNA binding motif (RNP1, RRM) protein 3                                                                | 3  | 5  | 21.7% | 17170  |
| <a href="#">[View Peptides]</a> | <a href="#">XRN2</a>                | 5'-3' exoribonuclease 2                                                                                | 17 | 44 | 21.5% | 108583 |
| <a href="#">[View Peptides]</a> | <a href="#">ACTN1</a>               | actinin, alpha 1                                                                                       | 13 | 17 | 21.5% | 103058 |
| <a href="#">[View Peptides]</a> | <a href="#">SFRS3</a>               | splicing factor, arginine/serine-rich 3                                                                | 4  | 15 | 21.3% | 19330  |
| <a href="#">[View Peptides]</a> | <a href="#">RPS4X</a>               | ribosomal protein S4, X-linked                                                                         | 4  | 6  | 21.3% | 29598  |
| <a href="#">[View Peptides]</a> | <a href="#">EXOSC2</a>              | exosome component 2                                                                                    | 4  | 4  | 21.2% | 32789  |
| <a href="#">[View Peptides]</a> | <a href="#">PGK1</a>                | phosphoglycerate kinase 1                                                                              | 5  | 9  | 21.1% | 44615  |
| <a href="#">[View Peptides]</a> | <a href="#">UBC, UBB, UBA52</a>     | ubiquitin C, ubiquitin B, ubiquitin A-52 residue ribosomal protein fusion product 1                    | 2  | 5  | 21.1% | 8565   |
| <a href="#">[View Peptides]</a> | <a href="#">CCT7</a>                | chaperonin containing TCP1, subunit 7 (eta)                                                            | 9  | 16 | 21.0% | 59367  |
| <a href="#">[View Peptides]</a> | <a href="#">KRT2</a>                | keratin 2 (epidermal ichthyosis bullosa of Siemens)                                                    | 15 | 32 | 20.8% | 65865  |
| <a href="#">[View Peptides]</a> | <a href="#">RPL4</a>                | ribosomal protein L4                                                                                   | 11 | 20 | 20.8% | 47697  |
| <a href="#">[View Peptides]</a> | <a href="#">TPI1</a>                | triosephosphate isomerase 1                                                                            | 3  | 9  | 20.5% | 26669  |
| <a href="#">[View Peptides]</a> | <a href="#">HSPA8</a>               | heat shock 70kDa protein 8                                                                             | 9  | 19 | 20.4% | 70898  |
| <a href="#">[View Peptides]</a> | <a href="#">SFRS9</a>               | splicing factor, arginine/serine-rich 9                                                                | 4  | 20 | 20.4% | 25542  |
| <a href="#">[View Peptides]</a> | <a href="#">SPTAN1</a>              | spectrin, alpha, non-erythrocytic 1 (alpha-fodrin)                                                     | 37 | 68 | 20.3% | 284526 |
| <a href="#">[View Peptides]</a> | <a href="#">RBM39</a>               | RNA binding motif protein 39                                                                           | 9  | 22 | 20.2% | 59380  |
| <a href="#">[View Peptides]</a> | <a href="#">PPP1CB</a>              | protein phosphatase 1, catalytic subunit, beta isoform                                                 | 4  | 34 | 20.2% | 37187  |
| <a href="#">[View Peptides]</a> | <a href="#">EIF6</a>                | eukaryotic translation initiation factor 6                                                             | 3  | 6  | 20.0% | 26599  |
| <a href="#">[View Peptides]</a> | <a href="#">RPL18A</a>              | ribosomal protein L18a                                                                                 | 4  | 6  | 19.9% | 20762  |
| <a href="#">[View Peptides]</a> | <a href="#">ACTL6A</a>              | actin-like 6A                                                                                          | 6  | 7  | 19.8% | 47461  |
| <a href="#">[View Peptides]</a> | <a href="#">RPL24</a>               | ribosomal protein L24                                                                                  | 4  | 8  | 19.7% | 17779  |
| <a href="#">[View Peptides]</a> | <a href="#">HNRNPL</a>              | heterogeneous nuclear ribonucleoprotein L                                                              | 7  | 17 | 19.4% | 60187  |
| <a href="#">[View Peptides]</a> | <a href="#">S100A8</a>              | S100 calcium binding protein A8                                                                        | 2  | 2  | 19.4% | 10834  |
| <a href="#">[View Peptides]</a> | <a href="#">RPL9</a>                | ribosomal protein L9                                                                                   | 4  | 8  | 19.3% | 21863  |
| <a href="#">[View Peptides]</a> | <a href="#">PSMA4</a>               | proteasome (prosome, macropain) subunit, alpha type, 4                                                 | 3  | 4  | 19.2% | 29484  |
| <a href="#">[View Peptides]</a> | <a href="#">RPS15A</a>              | ribosomal protein S15a                                                                                 | 3  | 5  | 19.2% | 14839  |
| <a href="#">[View Peptides]</a> | <a href="#">RPS26</a>               | ribosomal protein S26                                                                                  | 2  | 4  | 19.1% | 13015  |

|                                 |                        |                                                                           |    |    |       |        |
|---------------------------------|------------------------|---------------------------------------------------------------------------|----|----|-------|--------|
| <a href="#">[View Peptides]</a> | <a href="#">HSPA5</a>  | heat shock 70kDa protein 5 (glucose-regulated protein, 78kDa)             | 9  | 11 | 19.1% | 72333  |
| <a href="#">[View Peptides]</a> | <a href="#">VCP</a>    | valosin-containing protein                                                | 10 | 12 | 19.1% | 89322  |
| <a href="#">[View Peptides]</a> | <a href="#">CORO1C</a> | coronin, actin binding protein, 1C                                        | 9  | 20 | 19.0% | 53249  |
| <a href="#">[View Peptides]</a> | <a href="#">NOLA2</a>  | nucleolar protein family A, member 2 (H/ACA small nucleolar RNPs)         | 2  | 4  | 19.0% | 17201  |
| <a href="#">[View Peptides]</a> | <a href="#">U2AF2</a>  | U2 small nuclear RNA auxiliary factor 2                                   | 6  | 17 | 18.9% | 53501  |
| <a href="#">[View Peptides]</a> | <a href="#">DDX17</a>  | DEAD (Asp-Glu-Ala-Asp) box polypeptide 17                                 | 12 | 30 | 18.8% | 72372  |
| <a href="#">[View Peptides]</a> | <a href="#">POLR1C</a> | polymerase (RNA) I polypeptide C, 30kDa                                   | 4  | 6  | 18.8% | 39250  |
| <a href="#">[View Peptides]</a> | <a href="#">CFL1</a>   | cofilin 1 (non-muscle)                                                    | 2  | 3  | 18.7% | 18502  |
| <a href="#">[View Peptides]</a> | <a href="#">CFL2</a>   | cofilin 2 (muscle)                                                        | 2  | 2  | 18.7% | 18737  |
| <a href="#">[View Peptides]</a> | <a href="#">CDC5L</a>  | CDC5 cell division cycle 5-like (S. pombe)                                | 11 | 17 | 18.7% | 92251  |
| <a href="#">[View Peptides]</a> | <a href="#">SPTBN1</a> | spectrin, beta, non-erythrocytic 1                                        | 31 | 51 | 18.6% | 274630 |
| <a href="#">[View Peptides]</a> | <a href="#">MYL6</a>   | myosin, light chain 6, alkali, smooth muscle and non-muscle               | 3  | 3  | 18.5% | 16930  |
| <a href="#">[View Peptides]</a> | <a href="#">GNB2L1</a> | guanine nucleotide binding protein (G protein), beta polypeptide 2-like 1 | 4  | 4  | 18.3% | 35077  |
| <a href="#">[View Peptides]</a> | <a href="#">LRPPRC</a> | leucine-rich PPR-motif containing                                         | 15 | 23 | 18.2% | 145201 |
| <a href="#">[View Peptides]</a> | <a href="#">EXOSC3</a> | exosome component 3                                                       | 3  | 4  | 18.2% | 29572  |
| <a href="#">[View Peptides]</a> | <a href="#">CSNK2B</a> | casein kinase 2, beta polypeptide                                         | 2  | 3  | 18.1% | 24942  |
| <a href="#">[View Peptides]</a> | <a href="#">RFC2</a>   | replication factor C (activator 1) 2, 40kDa                               | 4  | 7  | 18.1% | 39157  |
| <a href="#">[View Peptides]</a> | <a href="#">EWSR1</a>  | Ewing sarcoma breakpoint region 1                                         | 13 | 52 | 18.0% | 68478  |
| <a href="#">[View Peptides]</a> | <a href="#">ACTC1</a>  | actin, alpha, cardiac muscle 1                                            | 10 | 34 | 18.0% | 42019  |
| <a href="#">[View Peptides]</a> | <a href="#">ACTA1</a>  | actin, alpha 1, skeletal muscle                                           | 10 | 34 | 18.0% | 42051  |
| <a href="#">[View Peptides]</a> | <a href="#">ACTA2</a>  | actin, alpha 2, smooth muscle, aorta                                      | 10 | 34 | 18.0% | 42009  |
| <a href="#">[View Peptides]</a> | <a href="#">PCNA</a>   | proliferating cell nuclear antigen                                        | 3  | 5  | 18.0% | 28769  |
| <a href="#">[View Peptides]</a> | <a href="#">EIF2S2</a> | eukaryotic translation initiation factor 2, subunit 2 beta, 38kDa         | 4  | 5  | 17.7% | 38388  |
| <a href="#">[View Peptides]</a> | <a href="#">EMG1</a>   | EMG1 nucleolar protein homolog (S. cerevisiae)                            | 3  | 5  | 17.6% | 26720  |
| <a href="#">[View Peptides]</a> | <a href="#">PPIH</a>   | peptidylprolyl isomerase H (cyclophilin H)                                | 2  | 2  | 17.5% | 19208  |
| <a href="#">[View Peptides]</a> | <a href="#">THOC1</a>  | THO complex 1                                                             | 8  | 13 | 17.5% | 75666  |
| <a href="#">[View Peptides]</a> | <a href="#">NOL1</a>   | nucleolar protein 1, 120kDa                                               | 11 | 19 | 17.5% | 94078  |
| <a href="#">[View Peptides]</a> | <a href="#">PSMA5</a>  | proteasome (prosome, macropain) subunit, alpha type, 5                    | 3  | 3  | 17.4% | 26411  |
| <a href="#">[View Peptides]</a> | <a href="#">SFERS5</a> | splicing factor, arginine/serine-rich 5                                   | 3  | 5  | 17.3% | 31264  |
| <a href="#">[View Peptides]</a> | <a href="#">MORC2</a>  | MORC family CW-type zinc finger 2                                         | 11 | 17 | 17.2% | 110724 |
| <a href="#">[View Peptides]</a> | <a href="#">RPS5</a>   | ribosomal protein S5                                                      | 2  | 3  | 17.2% | 22876  |
| <a href="#">[View Peptides]</a> | <a href="#">PRDX6</a>  | peroxiredoxin 6                                                           | 2  | 2  | 17.0% | 25035  |
| <a href="#">[View Peptides]</a> | <a href="#">RPL21</a>  | ribosomal protein L21                                                     | 3  | 6  | 16.9% | 18565  |
| <a href="#">[View Peptides]</a> | <a href="#">RPL3</a>   | ribosomal protein L3                                                      | 9  | 14 | 16.9% | 46109  |
| <a href="#">[View Peptides]</a> | <a href="#">TMPO</a>   | thymopoietin                                                              | 6  | 6  | 16.9% | 75492  |

|                                 |                                     |                                                                                                         |    |    |       |        |
|---------------------------------|-------------------------------------|---------------------------------------------------------------------------------------------------------|----|----|-------|--------|
| <a href="#">[View Peptides]</a> | <a href="#">CKAP5</a>               | cytoskeleton associated protein 5                                                                       | 34 | 46 | 16.9% | 225507 |
| <a href="#">[View Peptides]</a> | <a href="#">TOP2A</a>               | topoisomerase (DNA) II alpha 170kDa                                                                     | 18 | 33 | 16.8% | 174384 |
| <a href="#">[View Peptides]</a> | <a href="#">SAFB2</a>               | scaffold attachment factor B2                                                                           | 14 | 22 | 16.5% | 107474 |
| <a href="#">[View Peptides]</a> | <a href="#">RPS2</a>                | ribosomal protein S2                                                                                    | 4  | 4  | 16.4% | 31324  |
| <a href="#">[View Peptides]</a> | <a href="#">WDR74</a>               | WD repeat domain 74                                                                                     | 4  | 4  | 16.1% | 42441  |
| <a href="#">[View Peptides]</a> | <a href="#">TCP1</a>                | t-complex 1                                                                                             | 6  | 6  | 16.0% | 60344  |
| <a href="#">[View Peptides]</a> | <a href="#">TARDBP</a>              | TAR DNA binding protein                                                                                 | 6  | 7  | 15.9% | 44740  |
| <a href="#">[View Peptides]</a> | <a href="#">EXOSC10</a>             | exosome component 10                                                                                    | 10 | 15 | 15.9% | 100831 |
| <a href="#">[View Peptides]</a> | <a href="#">CD2BP2</a>              | CD2 (cytoplasmic tail) binding protein 2                                                                | 3  | 5  | 15.8% | 37646  |
| <a href="#">[View Peptides]</a> | <a href="#">SNRPG</a>               | small nuclear ribonucleoprotein polypeptide G                                                           | 2  | 2  | 15.8% | 8496   |
| <a href="#">[View Peptides]</a> | <a href="#">DDX23</a>               | DEAD (Asp-Glu-Ala-Asp) box polypeptide 23                                                               | 10 | 12 | 15.7% | 95647  |
| <a href="#">[View Peptides]</a> | <a href="#">RPS6</a>                | ribosomal protein S6                                                                                    | 3  | 5  | 15.7% | 28681  |
| <a href="#">[View Peptides]</a> | <a href="#">ASCC3L1</a>             | activating signal cointegrator 1 complex subunit 3-like 1                                               | 23 | 36 | 15.6% | 244505 |
| <a href="#">[View Peptides]</a> | <a href="#">RPL14</a>               | ribosomal protein L14                                                                                   | 5  | 8  | 15.5% | 23290  |
| <a href="#">[View Peptides]</a> | <a href="#">TAF15</a>               | TAF15 RNA polymerase II, TATA box binding protein (TBP)-associated factor, 68kDa                        | 7  | 55 | 15.5% | 61830  |
| <a href="#">[View Peptides]</a> | <a href="#">KRT6C</a>               | keratin 6C                                                                                              | 8  | 14 | 15.4% | 60025  |
| <a href="#">[View Peptides]</a> | <a href="#">PRPF19</a>              | PRP19/PSO4 pre-mRNA processing factor 19 homolog (S. cerevisiae)                                        | 6  | 16 | 15.3% | 55181  |
| <a href="#">[View Peptides]</a> | <a href="#">TERF2IP</a>             | telomeric repeat binding factor 2, interacting protein                                                  | 4  | 4  | 15.3% | 44260  |
| <a href="#">[View Peptides]</a> | <a href="#">RPL7</a>                | ribosomal protein L7                                                                                    | 5  | 8  | 15.3% | 29226  |
| <a href="#">[View Peptides]</a> | <a href="#">CNBP</a>                | CCHC-type zinc finger, nucleic acid binding protein                                                     | 3  | 36 | 15.3% | 19463  |
| <a href="#">[View Peptides]</a> | <a href="#">KRT16</a>               | keratin 16 (focal non-epidermolytic palmoplantar keratoderma)                                           | 7  | 12 | 15.2% | 51268  |
| <a href="#">[View Peptides]</a> | <a href="#">RPS15</a>               | ribosomal protein S15                                                                                   | 2  | 2  | 15.2% | 17040  |
| <a href="#">[View Peptides]</a> | <a href="#">RUVBL2</a>              | RuvB-like 2 (E. coli)                                                                                   | 5  | 8  | 15.1% | 51157  |
| <a href="#">[View Peptides]</a> | <a href="#">DHX9</a>                | DEAH (Asp-Glu-Ala-His) box polypeptide 9                                                                | 15 | 41 | 15.1% | 140881 |
| <a href="#">[View Peptides]</a> | <a href="#">SAFB</a>                | scaffold attachment factor B                                                                            | 11 | 18 | 15.0% | 102640 |
| <a href="#">[View Peptides]</a> | <a href="#">ELAVL1</a>              | ELAV (embryonic lethal, abnormal vision, Drosophila)-like 1 (Hu antigen R)                              | 4  | 7  | 15.0% | 36092  |
| <a href="#">[View Peptides]</a> | <a href="#">EXOSC5</a>              | exosome component 5                                                                                     | 2  | 3  | 14.9% | 25249  |
| <a href="#">[View Peptides]</a> | <a href="#">POLR2E</a>              | polymerase (RNA) II (DNA directed) polypeptide E, 25kDa                                                 | 2  | 4  | 14.8% | 24611  |
| <a href="#">[View Peptides]</a> | <a href="#">gi 87654, gi 929...</a> | gi 929663 emb CAA27544.1  unnamed protein product [Homo sapiens], pir  A24016 heterogeneous ribonucl... | 2  | 8  | 14.7% | 24198  |
| <a href="#">[View Peptides]</a> | <a href="#">RPL13</a>               | ribosomal protein L13                                                                                   | 4  | 6  | 14.7% | 24261  |
| <a href="#">[View Peptides]</a> | <a href="#">BCAS2</a>               | breast carcinoma amplified sequence 2                                                                   | 2  | 4  | 14.7% | 26131  |
| <a href="#">[View Peptides]</a> | <a href="#">PA2G4</a>               | proliferation-associated 2G4, 38kDa                                                                     | 4  | 8  | 14.7% | 43787  |
| <a href="#">[View Peptides]</a> | <a href="#">TUBB3, TUBB4</a>        | tubulin, beta 4, tubulin, beta 3                                                                        | 6  | 10 | 14.7% | 50433  |
| <a href="#">[View Peptides]</a> | <a href="#">CCT4</a>                | chaperonin containing TCP1, subunit 4 (delta)                                                           | 5  | 9  | 14.7% | 57924  |

|                                 |                                                         |                                                                                                               |    |    |       |        |
|---------------------------------|---------------------------------------------------------|---------------------------------------------------------------------------------------------------------------|----|----|-------|--------|
| <a href="#">[View Peptides]</a> | <a href="#">gi 107222, gi 48...</a>                     | ref NP_005372.1  nucleolin [Homo sapiens] ,<br>gi 189306 gb AAA59954.1  nucleolin,<br>gi 128841 sp P19338 ... | 8  | 18 | 14.7% | 76344  |
| <a href="#">[View Peptides]</a> | <a href="#">TOP1</a>                                    | topoisomerase (DNA) I                                                                                         | 11 | 16 | 14.6% | 90726  |
| <a href="#">[View Peptides]</a> | <a href="#">RPL34</a>                                   | ribosomal protein L34                                                                                         | 2  | 2  | 14.5% | 13293  |
| <a href="#">[View Peptides]</a> | <a href="#">RPL35A</a>                                  | ribosomal protein L35a                                                                                        | 2  | 4  | 14.5% | 12538  |
| <a href="#">[View Peptides]</a> | <a href="#">PSMB5</a>                                   | proteasome (prosome, macropain) subunit, beta type, 5                                                         | 2  | 2  | 14.4% | 22897  |
| <a href="#">[View Peptides]</a> | <a href="#">DNAJC8</a>                                  | DnaJ (Hsp40) homolog, subfamily C, member 8                                                                   | 2  | 3  | 14.2% | 29842  |
| <a href="#">[View Peptides]</a> | <a href="#">KPNA2</a>                                   | karyopherin alpha 2 (RAG cohort 1, importin alpha 1)                                                          | 4  | 5  | 14.2% | 57862  |
| <a href="#">[View Peptides]</a> | <a href="#">TPM3</a>                                    | tropomyosin 3                                                                                                 | 5  | 9  | 14.1% | 32819  |
| <a href="#">[View Peptides]</a> | <a href="#">RPL8</a>                                    | ribosomal protein L8                                                                                          | 4  | 5  | 14.0% | 28025  |
| <a href="#">[View Peptides]</a> | <a href="#">ANXA2</a>                                   | annexin A2                                                                                                    | 3  | 4  | 13.9% | 38604  |
| <a href="#">[View Peptides]</a> | <a href="#">WDR3</a>                                    | WD repeat domain 3                                                                                            | 7  | 11 | 13.8% | 106099 |
| <a href="#">[View Peptides]</a> | <a href="#">RPP30</a>                                   | ribonuclease P/MRP 30kDa subunit                                                                              | 2  | 2  | 13.8% | 29321  |
| <a href="#">[View Peptides]</a> | <a href="#">HDGF</a>                                    | hepatoma-derived growth factor (high-mobility group<br>protein 1-like)                                        | 2  | 3  | 13.8% | 26788  |
| <a href="#">[View Peptides]</a> | <a href="#">RPS19</a>                                   | ribosomal protein S19                                                                                         | 2  | 2  | 13.8% | 16060  |
| <a href="#">[View Peptides]</a> | <a href="#">RPL15</a>                                   | ribosomal protein L15                                                                                         | 3  | 8  | 13.7% | 24146  |
| <a href="#">[View Peptides]</a> | <a href="#">HNRPK</a>                                   | heterogeneous nuclear ribonucleoprotein K                                                                     | 5  | 6  | 13.6% | 50976  |
| <a href="#">[View Peptides]</a> | <a href="#">RBBP4</a>                                   | retinoblastoma binding protein 4                                                                              | 5  | 7  | 13.6% | 47656  |
| <a href="#">[View Peptides]</a> | <a href="#">YBX2</a>                                    | Y box binding protein 2                                                                                       | 3  | 7  | 13.5% | 38560  |
| <a href="#">[View Peptides]</a> | <a href="#">HIST1H2BL</a>                               | histone cluster 1, H2bl                                                                                       | 2  | 3  | 13.5% | 13952  |
| <a href="#">[View Peptides]</a> | <a href="#">HIST2H2BE</a>                               | histone cluster 2, H2be                                                                                       | 2  | 3  | 13.5% | 13920  |
| <a href="#">[View Peptides]</a> | <a href="#">gi 119623521, gi...</a>                     | gi 7387741 sp Q99877 H2B1N_HUMAN Histone H2B<br>type 1-N (H2B.d) (H2B/d),<br>gi 72533606 gb AAI01412.1  Hi... | 2  | 3  | 13.5% | 13922  |
| <a href="#">[View Peptides]</a> | <a href="#">HIST3H2BB</a>                               | histone cluster 3, H2bb                                                                                       | 2  | 3  | 13.5% | 13908  |
| <a href="#">[View Peptides]</a> | <a href="#">HIST1H2BJ</a>                               | histone cluster 1, H2bj                                                                                       | 2  | 3  | 13.5% | 13904  |
| <a href="#">[View Peptides]</a> | <a href="#">HIST1H2BD</a>                               | histone cluster 1, H2bd                                                                                       | 2  | 3  | 13.5% | 13936  |
| <a href="#">[View Peptides]</a> | <a href="#">HIST1H2BK</a>                               | histone cluster 1, H2bk                                                                                       | 2  | 3  | 13.5% | 13890  |
| <a href="#">[View Peptides]</a> | <a href="#">H2BFS</a>                                   | H2B histone family, member S                                                                                  | 2  | 3  | 13.5% | 13944  |
| <a href="#">[View Peptides]</a> | <a href="#">HIST1H2BO,</a><br><a href="#">HIST1H2BE</a> | histone cluster 1, H2bo, histone cluster 1, H2be                                                              | 2  | 3  | 13.5% | 13906  |
| <a href="#">[View Peptides]</a> | <a href="#">HIST1H2BH</a>                               | histone cluster 1, H2bh                                                                                       | 2  | 3  | 13.5% | 13892  |
| <a href="#">[View Peptides]</a> | <a href="#">WBSCR22</a>                                 | Williams Beuren syndrome chromosome region 22                                                                 | 2  | 2  | 13.5% | 31880  |
| <a href="#">[View Peptides]</a> | <a href="#">gi 22770649, gi ...</a>                     | emb CAC04135.1  dJ221C16.8 (novel histone 2B family<br>member) [Homo sapiens] ,<br>gi 9863666 emb CAC04130... | 2  | 3  | 13.5% | 13906  |
| <a href="#">[View Peptides]</a> | <a href="#">PSMB4</a>                                   | proteasome (prosome, macropain) subunit, beta type, 4                                                         | 2  | 5  | 13.3% | 29192  |
| <a href="#">[View Peptides]</a> | <a href="#">RPS23</a>                                   | ribosomal protein S23                                                                                         | 3  | 3  | 13.3% | 15808  |
| <a href="#">[View Peptides]</a> | <a href="#">PDIA6</a>                                   | protein disulfide isomerase family A, member 6                                                                | 3  | 4  | 13.2% | 48121  |



|                                 |                                 |                                                                             |    |    |       |        |
|---------------------------------|---------------------------------|-----------------------------------------------------------------------------|----|----|-------|--------|
| <a href="#">[View Peptides]</a> | <a href="#">TCOF1</a>           | Treacher Collins-Franceschetti syndrome 1                                   | 13 | 22 | 13.0% | 144312 |
| <a href="#">[View Peptides]</a> | <a href="#">EXOSC9</a>          | exosome component 9                                                         | 4  | 5  | 13.0% | 46978  |
| <a href="#">[View Peptides]</a> | <a href="#">HNRPA3</a>          | heterogeneous nuclear ribonucleoprotein A3                                  | 4  | 10 | 13.0% | 39595  |
| <a href="#">[View Peptides]</a> | <a href="#">CCT3</a>            | chaperonin containing TCP1, subunit 3 (gamma)                               | 5  | 6  | 12.7% | 60534  |
| <a href="#">[View Peptides]</a> | <a href="#">GPR137, CAPRIN1</a> | cell cycle associated protein 1, G protein-coupled receptor 137             | 9  | 28 | 12.6% | 72752  |
| <a href="#">[View Peptides]</a> | <a href="#">MTA2</a>            | metastasis associated 1 family, member 2                                    | 5  | 5  | 12.6% | 75023  |
| <a href="#">[View Peptides]</a> | <a href="#">RPL27</a>           | ribosomal protein L27                                                       | 3  | 5  | 12.5% | 15798  |
| <a href="#">[View Peptides]</a> | <a href="#">SNRPB</a>           | small nuclear ribonucleoprotein polypeptides B and B1                       | 4  | 11 | 12.5% | 24610  |
| <a href="#">[View Peptides]</a> | <a href="#">SNRPN, SNURF</a>    | SNRPN upstream reading frame, small nuclear ribonucleoprotein polypeptide N | 4  | 11 | 12.5% | 24614  |
| <a href="#">[View Peptides]</a> | <a href="#">TPM4</a>            | tropomyosin 4                                                               | 4  | 10 | 12.5% | 28522  |
| <a href="#">[View Peptides]</a> | <a href="#">RPS3A</a>           | ribosomal protein S3A                                                       | 4  | 7  | 12.5% | 29945  |
| <a href="#">[View Peptides]</a> | <a href="#">LSM14A</a>          | LSM14A, SCD6 homolog A (S. cerevisiae)                                      | 5  | 13 | 12.5% | 50530  |
| <a href="#">[View Peptides]</a> | <a href="#">CTTN</a>            | cortactin                                                                   | 3  | 4  | 12.5% | 61636  |
| <a href="#">[View Peptides]</a> | <a href="#">RPL11</a>           | ribosomal protein L11                                                       | 2  | 2  | 12.4% | 20252  |
| <a href="#">[View Peptides]</a> | <a href="#">RPS9</a>            | ribosomal protein S9                                                        | 3  | 4  | 12.4% | 22591  |
| <a href="#">[View Peptides]</a> | <a href="#">EEF1B2</a>          | eukaryotic translation elongation factor 1 beta 2                           | 2  | 2  | 12.4% | 24764  |
| <a href="#">[View Peptides]</a> | <a href="#">AURKA</a>           | aurora kinase A                                                             | 3  | 4  | 12.4% | 45809  |
| <a href="#">[View Peptides]</a> | <a href="#">CMAS</a>            | cytidine monophosphate N-acetylneuraminic acid synthetase                   | 4  | 5  | 12.4% | 48379  |
| <a href="#">[View Peptides]</a> | <a href="#">FLNB</a>            | filamin B, beta (actin binding protein 278)                                 | 19 | 27 | 12.4% | 278193 |
| <a href="#">[View Peptides]</a> | <a href="#">MED4</a>            | mediator complex subunit 4                                                  | 2  | 2  | 12.2% | 29745  |
| <a href="#">[View Peptides]</a> | <a href="#">PSMA1</a>           | proteasome (prosome, macropain) subunit, alpha type, 1                      | 3  | 3  | 12.2% | 29556  |
| <a href="#">[View Peptides]</a> | <a href="#">PRDX1</a>           | peroxiredoxin 1                                                             | 2  | 2  | 12.1% | 22110  |
| <a href="#">[View Peptides]</a> | <a href="#">HNRNPC</a>          | heterogeneous nuclear ribonucleoprotein C (C1/C2)                           | 4  | 5  | 12.1% | 33688  |
| <a href="#">[View Peptides]</a> | <a href="#">KRT14</a>           | keratin 14 (epidermolysis bullosa simplex, Dowling-Meara, Koebner)          | 6  | 9  | 12.1% | 51622  |
| <a href="#">[View Peptides]</a> | <a href="#">SF3A3</a>           | splicing factor 3a, subunit 3, 60kDa                                        | 5  | 9  | 12.0% | 58849  |
| <a href="#">[View Peptides]</a> | <a href="#">BAT1</a>            | HLA-B associated transcript 1                                               | 3  | 10 | 11.9% | 48991  |
| <a href="#">[View Peptides]</a> | <a href="#">TRIM28</a>          | tripartite motif-containing 28                                              | 7  | 15 | 11.9% | 88550  |
| <a href="#">[View Peptides]</a> | <a href="#">KIF23</a>           | kinesin family member 23                                                    | 6  | 8  | 11.9% | 98105  |
| <a href="#">[View Peptides]</a> | <a href="#">SF3B3</a>           | splicing factor 3b, subunit 3, 130kDa                                       | 11 | 21 | 11.9% | 135592 |
| <a href="#">[View Peptides]</a> | <a href="#">G3BP2</a>           | GTPase activating protein (SH3 domain) binding protein 2                    | 4  | 16 | 11.8% | 54111  |
| <a href="#">[View Peptides]</a> | <a href="#">IGHG1</a>           | immunoglobulin heavy constant gamma 1 (G1m marker)                          | 2  | 2  | 11.8% | 36106  |
| <a href="#">[View Peptides]</a> | <a href="#">ACAT1</a>           | acetyl-Coenzyme A acetyltransferase 1 (acetoacetyl Coenzyme A thiolase)     | 3  | 4  | 11.7% | 45200  |
| <a href="#">[View Peptides]</a> | <a href="#">DDB2</a>            | damage-specific DNA binding protein 2, 48kDa                                | 3  | 5  | 11.7% | 47864  |

|                                 |                                     |                                                                                                         |    |    |       |        |
|---------------------------------|-------------------------------------|---------------------------------------------------------------------------------------------------------|----|----|-------|--------|
| <a href="#">[View Peptides]</a> | <a href="#">EIF2S3</a>              | eukaryotic translation initiation factor 2, subunit 3 gamma, 52kDa                                      | 4  | 4  | 11.7% | 51110  |
| <a href="#">[View Peptides]</a> | <a href="#">CCT6A</a>               | chaperonin containing TCP1, subunit 6A (zeta 1)                                                         | 4  | 7  | 11.7% | 58024  |
| <a href="#">[View Peptides]</a> | <a href="#">BUB3</a>                | BUB3 budding uninhibited by benzimidazoles 3 homolog (yeast)                                            | 3  | 3  | 11.6% | 37155  |
| <a href="#">[View Peptides]</a> | <a href="#">ACTR3</a>               | ARP3 actin-related protein 3 homolog (yeast)                                                            | 3  | 3  | 11.5% | 47371  |
| <a href="#">[View Peptides]</a> | <a href="#">PAK1IP1</a>             | PAK1 interacting protein 1                                                                              | 3  | 5  | 11.5% | 43964  |
| <a href="#">[View Peptides]</a> | <a href="#">PCBP2</a>               | poly(rC) binding protein 2                                                                              | 3  | 8  | 11.5% | 38580  |
| <a href="#">[View Peptides]</a> | <a href="#">DRG1</a>                | developmentally regulated GTP binding protein 1                                                         | 3  | 3  | 11.4% | 40542  |
| <a href="#">[View Peptides]</a> | <a href="#">ALDOC</a>               | aldolase C, fructose-bisphosphate                                                                       | 3  | 11 | 11.3% | 39456  |
| <a href="#">[View Peptides]</a> | <a href="#">FEN1</a>                | flap structure-specific endonuclease 1                                                                  | 3  | 5  | 11.3% | 42593  |
| <a href="#">[View Peptides]</a> | <a href="#">PLRG1</a>               | pleiotropic regulator 1 (PRL1 homolog, Arabidopsis)                                                     | 4  | 7  | 11.3% | 57194  |
| <a href="#">[View Peptides]</a> | <a href="#">HSPD1</a>               | heat shock 60kDa protein 1 (chaperonin)                                                                 | 3  | 4  | 11.3% | 61055  |
| <a href="#">[View Peptides]</a> | <a href="#">PDIA4</a>               | protein disulfide isomerase family A, member 4                                                          | 4  | 4  | 11.3% | 72933  |
| <a href="#">[View Peptides]</a> | <a href="#">RPL6</a>                | ribosomal protein L6                                                                                    | 3  | 3  | 11.1% | 32728  |
| <a href="#">[View Peptides]</a> | <a href="#">EBNA1BP2</a>            | EBNA1 binding protein 2                                                                                 | 2  | 6  | 11.1% | 34820  |
| <a href="#">[View Peptides]</a> | <a href="#">BCLAF1</a>              | BCL2-associated transcription factor 1                                                                  | 7  | 13 | 11.1% | 106122 |
| <a href="#">[View Peptides]</a> | <a href="#">RBMX</a>                | RNA binding motif protein, X-linked                                                                     | 6  | 24 | 11.0% | 42332  |
| <a href="#">[View Peptides]</a> | <a href="#">YWHAH</a>               | tyrosine 3-monooxygenase/tryptophan 5-monooxygenase activation protein, eta polypeptide                 | 2  | 3  | 11.0% | 28219  |
| <a href="#">[View Peptides]</a> | <a href="#">YWHAB</a>               | tyrosine 3-monooxygenase/tryptophan 5-monooxygenase activation protein, beta polypeptide                | 2  | 3  | 11.0% | 28082  |
| <a href="#">[View Peptides]</a> | <a href="#">YWHAQ</a>               | tyrosine 3-monooxygenase/tryptophan 5-monooxygenase activation protein, theta polypeptide               | 2  | 3  | 11.0% | 27764  |
| <a href="#">[View Peptides]</a> | <a href="#">RPL26L1</a>             | ribosomal protein L26-like 1                                                                            | 2  | 4  | 11.0% | 17256  |
| <a href="#">[View Peptides]</a> | <a href="#">RPL26</a>               | ribosomal protein L26                                                                                   | 2  | 4  | 11.0% | 17258  |
| <a href="#">[View Peptides]</a> | <a href="#">GTF3C5</a>              | general transcription factor IIIC, polypeptide 5, 63kDa                                                 | 4  | 4  | 11.0% | 59571  |
| <a href="#">[View Peptides]</a> | <a href="#">YWHAG</a>               | tyrosine 3-monooxygenase/tryptophan 5-monooxygenase activation protein, gamma polypeptide               | 2  | 3  | 10.9% | 28303  |
| <a href="#">[View Peptides]</a> | <a href="#">gi 59797947, gi ...</a> | gi 59797947 sp Q8IUH3 DRBP1_HUMAN Developmentally-regulated RNA-binding protein 1 (RB-1), gi 2283132... | 3  | 5  | 10.9% | 53503  |
| <a href="#">[View Peptides]</a> | <a href="#">HDAC2</a>               | histone deacetylase 2                                                                                   | 3  | 4  | 10.9% | 55364  |
| <a href="#">[View Peptides]</a> | <a href="#">SF3A1</a>               | splicing factor 3a, subunit 1, 120kDa                                                                   | 7  | 16 | 10.8% | 88886  |
| <a href="#">[View Peptides]</a> | <a href="#">TMOD3</a>               | tropomodulin 3 (ubiquitous)                                                                             | 2  | 2  | 10.8% | 39595  |
| <a href="#">[View Peptides]</a> | <a href="#">PRPF8</a>               | PRP8 pre-mRNA processing factor 8 homolog (S. cerevisiae)                                               | 18 | 26 | 10.6% | 273599 |
| <a href="#">[View Peptides]</a> | <a href="#">DNPTIP1</a>             | deoxynucleotidyltransferase, terminal, interacting protein 1                                            | 2  | 2  | 10.6% | 37013  |
| <a href="#">[View Peptides]</a> | <a href="#">PABPN1</a>              | poly(A) binding protein, nuclear 1                                                                      | 3  | 6  | 10.5% | 32749  |
| <a href="#">[View Peptides]</a> | <a href="#">POLR1A</a>              | polymerase (RNA) I polypeptide A, 194kDa                                                                | 11 | 14 | 10.4% | 194190 |
| <a href="#">[View Peptides]</a> | <a href="#">SF3B1</a>               | splicing factor 3b, subunit 1, 155kDa                                                                   | 9  | 14 | 10.4% | 145815 |

|                                 |                            |                                                                                                          |    |    |       |        |
|---------------------------------|----------------------------|----------------------------------------------------------------------------------------------------------|----|----|-------|--------|
| <a href="#">[View Peptides]</a> | <a href="#">GTF2H3</a>     | general transcription factor IIH, polypeptide 3, 34kDa                                                   | 2  | 2  | 10.4% | 34378  |
| <a href="#">[View Peptides]</a> | <a href="#">H1FX</a>       | H1 histone family, member X                                                                              | 2  | 4  | 10.3% | 22487  |
| <a href="#">[View Peptides]</a> | <a href="#">IFI16</a>      | interferon, gamma-inducible protein 16                                                                   | 6  | 8  | 10.3% | 88275  |
| <a href="#">[View Peptides]</a> | <a href="#">SF3B2</a>      | splicing factor 3b, subunit 2, 145kDa                                                                    | 5  | 9  | 10.2% | 97657  |
| <a href="#">[View Peptides]</a> | <a href="#">ERCC3</a>      | excision repair cross-complementing rodent repair deficiency, complementation group 3 (xeroderma pig...  | 5  | 7  | 10.2% | 89278  |
| <a href="#">[View Peptides]</a> | <a href="#">SFRS12</a>     | splicing factor, arginine/serine-rich 12                                                                 | 3  | 3  | 10.2% | 59380  |
| <a href="#">[View Peptides]</a> | <a href="#">RPSA</a>       | ribosomal protein SA                                                                                     | 2  | 2  | 10.2% | 32854  |
| <a href="#">[View Peptides]</a> | <a href="#">NOLA1</a>      | nucleolar protein family A, member 1 (H/ACA small nucleolar RNPs)                                        | 2  | 2  | 10.1% | 22348  |
| <a href="#">[View Peptides]</a> | <a href="#">SNRP70</a>     | small nuclear ribonucleoprotein 70kDa polypeptide (RNP antigen)                                          | 4  | 8  | 10.1% | 51557  |
| <a href="#">[View Peptides]</a> | <a href="#">SHMT2</a>      | serine hydroxymethyltransferase 2 (mitochondrial)                                                        | 3  | 5  | 10.1% | 55993  |
| <a href="#">[View Peptides]</a> | <a href="#">CIRH1A</a>     | cirrhosis, autosomal recessive 1A (cirhin)                                                               | 4  | 7  | 10.1% | 76890  |
| <a href="#">[View Peptides]</a> | <a href="#">DCD</a>        | dermcidin                                                                                                | 2  | 3  | 10.0% | 11284  |
| <a href="#">[View Peptides]</a> | <a href="#">EXOSC7</a>     | exosome component 7                                                                                      | 2  | 3  | 10.0% | 31835  |
| <a href="#">[View Peptides]</a> | <a href="#">FBL</a>        | fibrillarin                                                                                              | 2  | 5  | 10.0% | 33784  |
| <a href="#">[View Peptides]</a> | <a href="#">CCT5</a>       | chaperonin containing TCP1, subunit 5 (epsilon)                                                          | 4  | 5  | 10.0% | 59671  |
| <a href="#">[View Peptides]</a> | <a href="#">MYH9</a>       | myosin, heavy chain 9, non-muscle                                                                        | 11 | 21 | 9.9%  | 226530 |
| <a href="#">[View Peptides]</a> | <a href="#">SNW1</a>       | SNW domain containing 1                                                                                  | 3  | 3  | 9.9%  | 61495  |
| <a href="#">[View Peptides]</a> | <a href="#">gi 2506774</a> | gi 2506774 sp P05787 K2C8_HUMAN Keratin, type II cytoskeletal 8 (Cytokeratin-8) (CK-8) (Keraton-8) (...) | 4  | 6  | 9.9%  | 53674  |
| <a href="#">[View Peptides]</a> | <a href="#">RRS1</a>       | RRS1 ribosome biogenesis regulator homolog (S. cerevisiae)                                               | 2  | 3  | 9.9%  | 41193  |
| <a href="#">[View Peptides]</a> | <a href="#">C20orf77</a>   | chromosome 20 open reading frame 77                                                                      | 2  | 2  | 9.8%  | 36900  |
| <a href="#">[View Peptides]</a> | <a href="#">SEPT5</a>      | septin 5                                                                                                 | 2  | 7  | 9.8%  | 42777  |
| <a href="#">[View Peptides]</a> | <a href="#">VRK1</a>       | vaccinia related kinase 1                                                                                | 3  | 3  | 9.8%  | 45476  |
| <a href="#">[View Peptides]</a> | <a href="#">TOP2B</a>      | topoisomerase (DNA) II beta 180kDa                                                                       | 11 | 19 | 9.8%  | 183266 |
| <a href="#">[View Peptides]</a> | <a href="#">SFRS7</a>      | splicing factor, arginine/serine-rich 7, 35kDa                                                           | 2  | 10 | 9.7%  | 27367  |
| <a href="#">[View Peptides]</a> | <a href="#">DPF2</a>       | D4, zinc and double PHD fingers family 2                                                                 | 2  | 2  | 9.7%  | 44156  |
| <a href="#">[View Peptides]</a> | <a href="#">COIL</a>       | coilin                                                                                                   | 4  | 4  | 9.5%  | 62608  |
| <a href="#">[View Peptides]</a> | <a href="#">PABPC1</a>     | poly(A) binding protein, cytoplasmic 1                                                                   | 5  | 6  | 9.4%  | 70671  |
| <a href="#">[View Peptides]</a> | <a href="#">RPL13A</a>     | ribosomal protein L13a                                                                                   | 2  | 4  | 9.4%  | 23577  |
| <a href="#">[View Peptides]</a> | <a href="#">SMARCB1</a>    | SWI/SNF related, matrix associated, actin dependent regulator of chromatin, subfamily b, member 1        | 2  | 3  | 9.4%  | 44141  |
| <a href="#">[View Peptides]</a> | <a href="#">HIST1H1B</a>   | histone cluster 1, H1b                                                                                   | 2  | 4  | 9.3%  | 22580  |
| <a href="#">[View Peptides]</a> | <a href="#">LDHB</a>       | lactate dehydrogenase B                                                                                  | 2  | 4  | 9.3%  | 36639  |
| <a href="#">[View Peptides]</a> | <a href="#">HNRPD</a>      | heterogeneous nuclear ribonucleoprotein D (AU-rich element RNA binding protein 1, 37kDa)                 | 2  | 8  | 9.3%  | 38434  |
| <a href="#">[View Peptides]</a> | <a href="#">ABCF1</a>      | ATP-binding cassette, sub-family F (GCN20), member 1                                                     | 6  | 6  | 9.3%  | 95926  |
| <a href="#">[View Peptides]</a> | <a href="#">DDB1</a>       | damage-specific DNA binding protein 1, 127kDa                                                            | 8  | 11 | 9.2%  | 126968 |

|                                 |                                     |                                                                                                         |   |    |      |        |
|---------------------------------|-------------------------------------|---------------------------------------------------------------------------------------------------------|---|----|------|--------|
| <a href="#">[View Peptides]</a> | <a href="#">VIL1</a>                | villin 1                                                                                                | 6 | 6  | 9.2% | 92695  |
| <a href="#">[View Peptides]</a> | <a href="#">RPL10A</a>              | ribosomal protein L10a                                                                                  | 2 | 2  | 9.2% | 24831  |
| <a href="#">[View Peptides]</a> | <a href="#">WDR1</a>                | WD repeat domain 1                                                                                      | 3 | 7  | 8.9% | 66194  |
| <a href="#">[View Peptides]</a> | <a href="#">DHX15</a>               | DEAH (Asp-Glu-Ala-His) box polypeptide 15                                                               | 5 | 12 | 8.9% | 90933  |
| <a href="#">[View Peptides]</a> | <a href="#">WDR36</a>               | WD repeat domain 36                                                                                     | 6 | 6  | 8.9% | 105322 |
| <a href="#">[View Peptides]</a> | <a href="#">gi 550013, gi 10...</a> | gi 550013 gb AAA85654.1  ribosomal protein L5, pir  S55912 ribosomal protein L5, cytosolic - human ,... | 2 | 4  | 8.8% | 34448  |
| <a href="#">[View Peptides]</a> | <a href="#">WDR5</a>                | WD repeat domain 5                                                                                      | 2 | 2  | 8.7% | 36589  |
| <a href="#">[View Peptides]</a> | <a href="#">LMNA</a>                | lamin A/C                                                                                               | 4 | 9  | 8.7% | 74140  |
| <a href="#">[View Peptides]</a> | <a href="#">KRT5</a>                | keratin 5 (epidermolysis bullosa simplex, Dowling-Meara/Kobner/Weber-Cockayne types)                    | 6 | 12 | 8.6% | 62447  |
| <a href="#">[View Peptides]</a> | <a href="#">POLDIP3</a>             | polymerase (DNA-directed), delta interacting protein 3                                                  | 2 | 2  | 8.6% | 46089  |
| <a href="#">[View Peptides]</a> | <a href="#">TGM3</a>                | transglutaminase 3 (E polypeptide, protein-glutamine-gamma-glutamyltransferase)                         | 3 | 7  | 8.5% | 76632  |
| <a href="#">[View Peptides]</a> | <a href="#">CSTF2</a>               | cleavage stimulation factor, 3' pre-RNA, subunit 2, 64kDa                                               | 3 | 4  | 8.5% | 60959  |
| <a href="#">[View Peptides]</a> | <a href="#">BCKDK</a>               | branched chain ketoacid dehydrogenase kinase                                                            | 3 | 3  | 8.5% | 46360  |
| <a href="#">[View Peptides]</a> | <a href="#">RFC5</a>                | replication factor C (activator 1) 5, 36.5kDa                                                           | 2 | 3  | 8.5% | 38497  |
| <a href="#">[View Peptides]</a> | <a href="#">EIF4A1</a>              | eukaryotic translation initiation factor 4A, isoform 1                                                  | 2 | 2  | 8.4% | 46154  |
| <a href="#">[View Peptides]</a> | <a href="#">GTPBP4</a>              | GTP binding protein 4                                                                                   | 4 | 4  | 8.4% | 73965  |
| <a href="#">[View Peptides]</a> | <a href="#">NOLC1</a>               | nucleolar and coiled-body phosphoprotein 1                                                              | 5 | 9  | 8.3% | 73720  |
| <a href="#">[View Peptides]</a> | <a href="#">RPL23A</a>              | ribosomal protein L23a                                                                                  | 2 | 2  | 8.3% | 17695  |
| <a href="#">[View Peptides]</a> | <a href="#">PWP2</a>                | PWP2 periodic tryptophan protein homolog (yeast)                                                        | 5 | 8  | 8.1% | 102451 |
| <a href="#">[View Peptides]</a> | <a href="#">KIF2C</a>               | kinesin family member 2C                                                                                | 4 | 4  | 8.1% | 81313  |
| <a href="#">[View Peptides]</a> | <a href="#">PABPC4</a>              | poly(A) binding protein, cytoplasmic 4 (inducible form)                                                 | 4 | 5  | 8.1% | 70783  |
| <a href="#">[View Peptides]</a> | <a href="#">NXF1</a>                | nuclear RNA export factor 1                                                                             | 3 | 3  | 8.1% | 70182  |
| <a href="#">[View Peptides]</a> | <a href="#">PDIA3</a>               | protein disulfide isomerase family A, member 3                                                          | 3 | 3  | 8.1% | 56782  |
| <a href="#">[View Peptides]</a> | <a href="#">PSMD12</a>              | proteasome (prosome, macropain) 26S subunit, non-ATPase, 12                                             | 2 | 2  | 8.1% | 52904  |
| <a href="#">[View Peptides]</a> | <a href="#">EEF1G</a>               | eukaryotic translation elongation factor 1 gamma                                                        | 2 | 3  | 8.0% | 50119  |
| <a href="#">[View Peptides]</a> | <a href="#">USP10</a>               | ubiquitin specific peptidase 10                                                                         | 4 | 4  | 8.0% | 87134  |
| <a href="#">[View Peptides]</a> | <a href="#">CSTF2T</a>              | cleavage stimulation factor, 3' pre-RNA, subunit 2, 64kDa, tau variant                                  | 3 | 4  | 8.0% | 64436  |
| <a href="#">[View Peptides]</a> | <a href="#">MYBBP1A</a>             | MYB binding protein (P160) 1a                                                                           | 6 | 9  | 7.9% | 148854 |
| <a href="#">[View Peptides]</a> | <a href="#">PRPF40A</a>             | PRP40 pre-mRNA processing factor 40 homolog A (S. cerevisiae)                                           | 5 | 9  | 7.9% | 108805 |
| <a href="#">[View Peptides]</a> | <a href="#">CPSF2</a>               | cleavage and polyadenylation specific factor 2, 100kDa                                                  | 3 | 3  | 7.9% | 88487  |
| <a href="#">[View Peptides]</a> | <a href="#">HNRPM</a>               | heterogeneous nuclear ribonucleoprotein M                                                               | 4 | 6  | 7.9% | 77516  |
| <a href="#">[View Peptides]</a> | <a href="#">CDSN</a>                | corneodesmosin                                                                                          | 2 | 4  | 7.9% | 51495  |
| <a href="#">[View Peptides]</a> | <a href="#">DAZAP1</a>              | DAZ associated protein 1                                                                                | 2 | 2  | 7.9% | 43383  |

|                                 |                                     |                                                                                                         |   |    |      |        |
|---------------------------------|-------------------------------------|---------------------------------------------------------------------------------------------------------|---|----|------|--------|
| <a href="#">[View Peptides]</a> | <a href="#">RBBP5</a>               | retinoblastoma binding protein 5                                                                        | 2 | 2  | 7.8% | 59082  |
| <a href="#">[View Peptides]</a> | <a href="#">FSCN1</a>               | fascin homolog 1, actin-bundling protein (Strongylocentrotus purpuratus)                                | 2 | 2  | 7.7% | 54530  |
| <a href="#">[View Peptides]</a> | <a href="#">PLK1</a>                | polo-like kinase 1 (Drosophila)                                                                         | 3 | 3  | 7.6% | 68255  |
| <a href="#">[View Peptides]</a> | <a href="#">MSN</a>                 | moesin                                                                                                  | 3 | 3  | 7.6% | 67820  |
| <a href="#">[View Peptides]</a> | <a href="#">WDR57</a>               | WD repeat domain 57 (U5 snRNP specific)                                                                 | 2 | 3  | 7.6% | 39311  |
| <a href="#">[View Peptides]</a> | <a href="#">HSP90AB1</a>            | heat shock protein 90kDa alpha (cytosolic), class B member 1                                            | 4 | 6  | 7.5% | 83264  |
| <a href="#">[View Peptides]</a> | <a href="#">KHDRBS1</a>             | KH domain containing, RNA binding, signal transduction associated 1                                     | 4 | 6  | 7.4% | 48227  |
| <a href="#">[View Peptides]</a> | <a href="#">MTA1</a>                | metastasis associated 1                                                                                 | 3 | 5  | 7.4% | 80788  |
| <a href="#">[View Peptides]</a> | <a href="#">UBAP2L</a>              | ubiquitin associated protein 2-like                                                                     | 4 | 6  | 7.4% | 103930 |
| <a href="#">[View Peptides]</a> | <a href="#">IFIT5</a>               | interferon-induced protein with tetratricopeptide repeats 5                                             | 2 | 2  | 7.3% | 55847  |
| <a href="#">[View Peptides]</a> | <a href="#">METAP2</a>              | methionyl aminopeptidase 2                                                                              | 2 | 3  | 7.3% | 52892  |
| <a href="#">[View Peptides]</a> | <a href="#">NAT10</a>               | N-acetyltransferase 10                                                                                  | 4 | 4  | 7.2% | 115704 |
| <a href="#">[View Peptides]</a> | <a href="#">LDHA</a>                | lactate dehydrogenase A                                                                                 | 2 | 2  | 7.2% | 36689  |
| <a href="#">[View Peptides]</a> | <a href="#">MBD2</a>                | methyl-CpG binding domain protein 2                                                                     | 2 | 2  | 7.1% | 43255  |
| <a href="#">[View Peptides]</a> | <a href="#">CHD4</a>                | chromodomain helicase DNA binding protein 4                                                             | 9 | 11 | 7.1% | 217989 |
| <a href="#">[View Peptides]</a> | <a href="#">HSPA1A, HSPA1B</a>      | heat shock 70kDa protein 1B, heat shock 70kDa protein 1A                                                | 3 | 5  | 6.9% | 70052  |
| <a href="#">[View Peptides]</a> | <a href="#">ATIC</a>                | 5-aminoimidazole-4-carboxamide ribonucleotide formyltransferase/IMP cyclohydrolase                      | 2 | 3  | 6.9% | 64616  |
| <a href="#">[View Peptides]</a> | <a href="#">VIM</a>                 | vimentin                                                                                                | 2 | 2  | 6.9% | 53652  |
| <a href="#">[View Peptides]</a> | <a href="#">DDX39</a>               | DEAD (Asp-Glu-Ala-Asp) box polypeptide 39                                                               | 2 | 4  | 6.8% | 49130  |
| <a href="#">[View Peptides]</a> | <a href="#">IK</a>                  | IK cytokine, down-regulator of HLA II                                                                   | 2 | 2  | 6.8% | 65630  |
| <a href="#">[View Peptides]</a> | <a href="#">GMIP</a>                | GEM interacting protein                                                                                 | 4 | 5  | 6.8% | 106733 |
| <a href="#">[View Peptides]</a> | <a href="#">KRT17</a>               | keratin 17                                                                                              | 4 | 6  | 6.7% | 48106  |
| <a href="#">[View Peptides]</a> | <a href="#">SMARCD1</a>             | SWI/SNF related, matrix associated, actin dependent regulator of chromatin, subfamily d, member 1       | 2 | 3  | 6.7% | 54945  |
| <a href="#">[View Peptides]</a> | <a href="#">ROD1</a>                | ROD1 regulator of differentiation 1 (S. pombe)                                                          | 3 | 5  | 6.7% | 56502  |
| <a href="#">[View Peptides]</a> | <a href="#">PPP2R1B</a>             | protein phosphatase 2 (formerly 2A), regulatory subunit A, beta isoform                                 | 2 | 2  | 6.7% | 66202  |
| <a href="#">[View Peptides]</a> | <a href="#">RAD21</a>               | RAD21 homolog (S. pombe)                                                                                | 2 | 2  | 6.7% | 71690  |
| <a href="#">[View Peptides]</a> | <a href="#">HSP90B1</a>             | heat shock protein 90kDa beta (Grp94), member 1                                                         | 3 | 4  | 6.7% | 92469  |
| <a href="#">[View Peptides]</a> | <a href="#">TBL1XR1</a>             | transducin (beta)-like 1X-linked receptor 1                                                             | 2 | 3  | 6.6% | 55595  |
| <a href="#">[View Peptides]</a> | <a href="#">PRMT3</a>               | protein arginine methyltransferase 3                                                                    | 2 | 2  | 6.6% | 59903  |
| <a href="#">[View Peptides]</a> | <a href="#">DDX18</a>               | DEAD (Asp-Glu-Ala-Asp) box polypeptide 18                                                               | 3 | 3  | 6.6% | 75407  |
| <a href="#">[View Peptides]</a> | <a href="#">ZBTB1</a>               | zinc finger and BTB domain containing 1                                                                 | 3 | 4  | 6.6% | 82016  |
| <a href="#">[View Peptides]</a> | <a href="#">gi 40254816, gi ...</a> | gi 40254816 ref NP_005339.2  heat shock protein 90kDa alpha (cytosolic), class A member 1 isoform 2 ... | 4 | 4  | 6.6% | 84674  |
| <a href="#">[View Peptides]</a> | <a href="#">DNMT1</a>               | DNA (cytosine-5-)-methyltransferase 1                                                                   | 6 | 7  | 6.6% | 183164 |

|                                 |                                     |                                                                                                         |    |    |      |        |
|---------------------------------|-------------------------------------|---------------------------------------------------------------------------------------------------------|----|----|------|--------|
| <a href="#">[View Peptides]</a> | <a href="#">NMT1</a>                | N-myristoyltransferase 1                                                                                | 2  | 3  | 6.5% | 56806  |
| <a href="#">[View Peptides]</a> | <a href="#">NOL11</a>               | nucleolar protein 11                                                                                    | 3  | 3  | 6.5% | 81124  |
| <a href="#">[View Peptides]</a> | <a href="#">EEF2</a>                | eukaryotic translation elongation factor 2                                                              | 4  | 5  | 6.5% | 95338  |
| <a href="#">[View Peptides]</a> | <a href="#">BLM</a>                 | Bloom syndrome                                                                                          | 5  | 5  | 6.5% | 159000 |
| <a href="#">[View Peptides]</a> | <a href="#">MKI67</a>               | antigen identified by monoclonal antibody Ki-67                                                         | 18 | 22 | 6.5% | 358747 |
| <a href="#">[View Peptides]</a> | <a href="#">MYH10</a>               | myosin, heavy chain 10, non-muscle                                                                      | 7  | 10 | 6.4% | 228937 |
| <a href="#">[View Peptides]</a> | <a href="#">ERCC2</a>               | excision repair cross-complementing rodent repair deficiency, complementation group 2 (xeroderma pig... | 3  | 4  | 6.4% | 86909  |
| <a href="#">[View Peptides]</a> | <a href="#">SEPT8</a>               | septin 8                                                                                                | 3  | 4  | 6.4% | 55756  |
| <a href="#">[View Peptides]</a> | <a href="#">DDX52</a>               | DEAD (Asp-Glu-Ala-Asp) box polypeptide 52                                                               | 2  | 2  | 6.3% | 67466  |
| <a href="#">[View Peptides]</a> | <a href="#">RSL1D1</a>              | ribosomal L1 domain containing 1                                                                        | 2  | 3  | 6.3% | 54973  |
| <a href="#">[View Peptides]</a> | <a href="#">HDAC1</a>               | histone deacetylase 1                                                                                   | 2  | 3  | 6.2% | 55103  |
| <a href="#">[View Peptides]</a> | <a href="#">SFRS6</a>               | splicing factor, arginine/serine-rich 6                                                                 | 2  | 2  | 6.1% | 39587  |
| <a href="#">[View Peptides]</a> | <a href="#">DEK</a>                 | DEK oncogene (DNA binding)                                                                              | 2  | 2  | 6.1% | 42674  |
| <a href="#">[View Peptides]</a> | <a href="#">TOPBP1</a>              | topoisomerase (DNA) II binding protein 1                                                                | 6  | 10 | 6.0% | 170677 |
| <a href="#">[View Peptides]</a> | <a href="#">SKIV2L2</a>             | superkiller viralicidic activity 2-like 2 ( <i>S. cerevisiae</i> )                                      | 4  | 4  | 6.0% | 117805 |
| <a href="#">[View Peptides]</a> | <a href="#">gi 119613009, gi...</a> | gi 6562436 emb CAB62539.1  gamma tubulin ring complex protein [Homo sapiens], gi 22095730 sp Q9UGJ1 ... | 2  | 2  | 6.0% | 76089  |
| <a href="#">[View Peptides]</a> | <a href="#">RBM14</a>               | RNA binding motif protein 14                                                                            | 3  | 5  | 6.0% | 69492  |
| <a href="#">[View Peptides]</a> | <a href="#">CHAF1B</a>              | chromatin assembly factor 1, subunit B (p60)                                                            | 2  | 2  | 5.9% | 61493  |
| <a href="#">[View Peptides]</a> | <a href="#">TKT</a>                 | transketolase (Wernicke-Korsakoff syndrome)                                                             | 2  | 2  | 5.9% | 67878  |
| <a href="#">[View Peptides]</a> | <a href="#">FTSJ3</a>               | FtsJ homolog 3 ( <i>E. coli</i> )                                                                       | 3  | 3  | 5.9% | 96576  |
| <a href="#">[View Peptides]</a> | <a href="#">SYMPK</a>               | symplekin                                                                                               | 4  | 8  | 5.9% | 141148 |
| <a href="#">[View Peptides]</a> | <a href="#">HEATR1</a>              | HEAT repeat containing 1                                                                                | 8  | 11 | 5.9% | 242368 |
| <a href="#">[View Peptides]</a> | <a href="#">AHNAK</a>               | AHNAK nucleoprotein                                                                                     | 10 | 10 | 5.8% | 312493 |
| <a href="#">[View Peptides]</a> | <a href="#">CHAF1A</a>              | chromatin assembly factor 1, subunit A (p150)                                                           | 4  | 4  | 5.8% | 105223 |
| <a href="#">[View Peptides]</a> | <a href="#">CALD1</a>               | caldesmon 1                                                                                             | 3  | 5  | 5.8% | 93250  |
| <a href="#">[View Peptides]</a> | <a href="#">PIIG</a>                | peptidylprolyl isomerase G (cyclophilin G)                                                              | 3  | 6  | 5.8% | 88618  |
| <a href="#">[View Peptides]</a> | <a href="#">UTP18</a>               | UTP18, small subunit (SSU) processome component, homolog (yeast)                                        | 2  | 2  | 5.8% | 62004  |
| <a href="#">[View Peptides]</a> | <a href="#">DDX3Y</a>               | DEAD (Asp-Glu-Ala-Asp) box polypeptide 3, Y-linked                                                      | 3  | 6  | 5.8% | 73154  |
| <a href="#">[View Peptides]</a> | <a href="#">DDX3X</a>               | DEAD (Asp-Glu-Ala-Asp) box polypeptide 3, X-linked                                                      | 3  | 6  | 5.7% | 73244  |
| <a href="#">[View Peptides]</a> | <a href="#">ILF3</a>                | interleukin enhancer binding factor 3, 90kDa                                                            | 3  | 3  | 5.7% | 95339  |
| <a href="#">[View Peptides]</a> | <a href="#">PPP1R10</a>             | protein phosphatase 1, regulatory (inhibitor) subunit 10                                                | 4  | 5  | 5.7% | 99058  |
| <a href="#">[View Peptides]</a> | <a href="#">CHD8</a>                | chromodomain helicase DNA binding protein 8                                                             | 6  | 12 | 5.6% | 230356 |
| <a href="#">[View Peptides]</a> | <a href="#">RFC1</a>                | replication factor C (activator 1) 1, 145kDa                                                            | 4  | 7  | 5.6% | 128254 |
| <a href="#">[View Peptides]</a> | <a href="#">PRPF6</a>               | PRP6 pre-mRNA processing factor 6 homolog ( <i>S. cerevisiae</i> )                                      | 3  | 7  | 5.6% | 106925 |

|                                 |                                     |                                                                                                         |   |    |      |        |
|---------------------------------|-------------------------------------|---------------------------------------------------------------------------------------------------------|---|----|------|--------|
| <a href="#">[View Peptides]</a> | <a href="#">XRCC6</a>               | X-ray repair complementing defective repair in Chinese hamster cells 6 (Ku autoantigen, 70kDa)          | 2 | 4  | 5.6% | 69843  |
| <a href="#">[View Peptides]</a> | <a href="#">TERF2</a>               | telomeric repeat binding factor 2                                                                       | 2 | 2  | 5.6% | 55551  |
| <a href="#">[View Peptides]</a> | <a href="#">CUL4A</a>               | cullin 4A                                                                                               | 3 | 4  | 5.5% | 76821  |
| <a href="#">[View Peptides]</a> | <a href="#">ACSL4</a>               | acyl-CoA synthetase long-chain family member 4                                                          | 2 | 2  | 5.5% | 79188  |
| <a href="#">[View Peptides]</a> | <a href="#">THRAP3</a>              | thyroid hormone receptor associated protein 3                                                           | 7 | 16 | 5.5% | 108694 |
| <a href="#">[View Peptides]</a> | <a href="#">SMARCC2</a>             | SWI/SNF related, matrix associated, actin dependent regulator of chromatin, subfamily c, member 2       | 4 | 5  | 5.5% | 132879 |
| <a href="#">[View Peptides]</a> | <a href="#">SMARCA4</a>             | SWI/SNF related, matrix associated, actin dependent regulator of chromatin, subfamily a, member 4       | 6 | 7  | 5.4% | 184585 |
| <a href="#">[View Peptides]</a> | <a href="#">COPB1</a>               | coatamer protein complex, subunit beta 1                                                                | 3 | 4  | 5.4% | 107139 |
| <a href="#">[View Peptides]</a> | <a href="#">DBN1</a>                | drebrin 1                                                                                               | 2 | 4  | 5.4% | 71425  |
| <a href="#">[View Peptides]</a> | <a href="#">POLR1E</a>              | polymerase (RNA) I polypeptide E, 53kDa                                                                 | 2 | 2  | 5.4% | 53962  |
| <a href="#">[View Peptides]</a> | <a href="#">TUBG1</a>               | tubulin, gamma 1                                                                                        | 2 | 4  | 5.3% | 51170  |
| <a href="#">[View Peptides]</a> | <a href="#">TUBG2</a>               | tubulin, gamma 2                                                                                        | 2 | 4  | 5.3% | 51092  |
| <a href="#">[View Peptides]</a> | <a href="#">TUBGCP2</a>             | tubulin, gamma complex associated protein 2                                                             | 3 | 4  | 5.3% | 102534 |
| <a href="#">[View Peptides]</a> | <a href="#">MDC1</a>                | mediator of DNA damage checkpoint 1                                                                     | 5 | 6  | 5.2% | 226664 |
| <a href="#">[View Peptides]</a> | <a href="#">CLTC</a>                | clathrin, heavy chain (Hc)                                                                              | 5 | 7  | 5.1% | 191613 |
| <a href="#">[View Peptides]</a> | <a href="#">SRP68</a>               | signal recognition particle 68kDa                                                                       | 2 | 2  | 5.1% | 70730  |
| <a href="#">[View Peptides]</a> | <a href="#">FUBP1</a>               | far upstream element (FUSE) binding protein 1                                                           | 2 | 2  | 5.1% | 67473  |
| <a href="#">[View Peptides]</a> | <a href="#">DKC1</a>                | dyskeratosis congenita 1, dyskerin                                                                      | 2 | 2  | 5.1% | 57674  |
| <a href="#">[View Peptides]</a> | <a href="#">DSG1</a>                | desmoglein 1                                                                                            | 3 | 4  | 5.0% | 113716 |
| <a href="#">[View Peptides]</a> | <a href="#">HMMR</a>                | hyaluronan-mediated motility receptor (RHAMM)                                                           | 2 | 2  | 5.0% | 84031  |
| <a href="#">[View Peptides]</a> | <a href="#">gi 4758644, gi 3...</a> | gi 4758644 ref NP_004511.1  kinesin heavy chain member 2 [Homo sapiens], gi 3024057 sp O00139 KIF2_H... | 2 | 2  | 4.9% | 76927  |
| <a href="#">[View Peptides]</a> | <a href="#">KIF14</a>               | kinesin family member 14                                                                                | 4 | 5  | 4.9% | 186490 |
| <a href="#">[View Peptides]</a> | <a href="#">DIS3</a>                | DIS3 mitotic control homolog (S. cerevisiae)                                                            | 3 | 3  | 4.8% | 109003 |
| <a href="#">[View Peptides]</a> | <a href="#">LIG3</a>                | ligase III, DNA, ATP-dependent                                                                          | 3 | 4  | 4.8% | 102691 |
| <a href="#">[View Peptides]</a> | <a href="#">GAS2L3</a>              | growth arrest-specific 2 like 3                                                                         | 2 | 2  | 4.8% | 75214  |
| <a href="#">[View Peptides]</a> | <a href="#">LARP1</a>               | La ribonucleoprotein domain family, member 1                                                            | 4 | 8  | 4.7% | 123510 |
| <a href="#">[View Peptides]</a> | <a href="#">API5</a>                | apoptosis inhibitor 5                                                                                   | 2 | 2  | 4.7% | 57561  |
| <a href="#">[View Peptides]</a> | <a href="#">gi 119717, gi 48...</a> | pir  A34400 ezrin [validated] - human , gi 31283 emb CAA35893.1  unnamed protein product [Homo sapie... | 2 | 2  | 4.6% | 69399  |
| <a href="#">[View Peptides]</a> | <a href="#">SMC3</a>                | structural maintenance of chromosomes 3                                                                 | 3 | 3  | 4.6% | 141541 |
| <a href="#">[View Peptides]</a> | <a href="#">FASN</a>                | fatty acid synthase                                                                                     | 7 | 9  | 4.6% | 273397 |
| <a href="#">[View Peptides]</a> | <a href="#">CAST</a>                | calpastatin                                                                                             | 2 | 2  | 4.5% | 76501  |
| <a href="#">[View Peptides]</a> | <a href="#">XRCC5</a>               | X-ray repair complementing defective repair in Chinese hamster cells 5 (double-strand-break rejoinin... | 2 | 6  | 4.5% | 82705  |
| <a href="#">[View Peptides]</a> | <a href="#">GTF3C4</a>              | general transcription factor IIIC, polypeptide 4, 90kDa                                                 | 2 | 2  | 4.5% | 92001  |

|                                 |                                     |                                                                                                         |   |    |      |        |
|---------------------------------|-------------------------------------|---------------------------------------------------------------------------------------------------------|---|----|------|--------|
| <a href="#">[View Peptides]</a> | <a href="#">MKL1, RBM15</a>         | RNA binding motif protein 15, megakaryoblastic leukemia (translocation) 1                               | 3 | 4  | 4.5% | 107188 |
| <a href="#">[View Peptides]</a> | <a href="#">DSP</a>                 | desmoplakin                                                                                             | 8 | 10 | 4.5% | 331776 |
| <a href="#">[View Peptides]</a> | <a href="#">TUBGCP3</a>             | tubulin, gamma complex associated protein 3                                                             | 2 | 3  | 4.4% | 103571 |
| <a href="#">[View Peptides]</a> | <a href="#">gi 8923487, gi 7...</a> | ref NP_060329.1  uridine-cytidine kinase 1-like 1 [Homo sapiens] , gi 7020678 dbj BAA91230.1  unname... | 2 | 2  | 4.4% | 61140  |
| <a href="#">[View Peptides]</a> | <a href="#">PRKCSH</a>              | protein kinase C substrate 80K-H                                                                        | 2 | 2  | 4.4% | 59296  |
| <a href="#">[View Peptides]</a> | <a href="#">MCM3</a>                | minichromosome maintenance complex component 3                                                          | 2 | 2  | 4.3% | 90981  |
| <a href="#">[View Peptides]</a> | <a href="#">SMARCC1</a>             | SWI/SNF related, matrix associated, actin dependent regulator of chromatin, subfamily c, member 1       | 3 | 4  | 4.3% | 122753 |
| <a href="#">[View Peptides]</a> | <a href="#">SPTBN2</a>              | spectrin, beta, non-erythrocytic 2                                                                      | 6 | 6  | 4.2% | 271293 |
| <a href="#">[View Peptides]</a> | <a href="#">MED16</a>               | mediator complex subunit 16                                                                             | 2 | 2  | 4.2% | 96793  |
| <a href="#">[View Peptides]</a> | <a href="#">CDC2L2</a>              | cell division cycle 2-like 2 (PITSLRE proteins)                                                         | 2 | 2  | 4.1% | 91004  |
| <a href="#">[View Peptides]</a> | <a href="#">EEF1A1</a>              | eukaryotic translation elongation factor 1 alpha 1                                                      | 2 | 2  | 4.1% | 50141  |
| <a href="#">[View Peptides]</a> | <a href="#">EEF1A2</a>              | eukaryotic translation elongation factor 1 alpha 2                                                      | 2 | 2  | 4.1% | 50470  |
| <a href="#">[View Peptides]</a> | <a href="#">COPB2</a>               | coatamer protein complex, subunit beta 2 (beta prime)                                                   | 2 | 2  | 4.0% | 102487 |
| <a href="#">[View Peptides]</a> | <a href="#">MOV10</a>               | Mov10, Moloney leukemia virus 10, homolog (mouse)                                                       | 2 | 2  | 4.0% | 113671 |
| <a href="#">[View Peptides]</a> | <a href="#">CPSF1</a>               | cleavage and polyadenylation specific factor 1, 160kDa                                                  | 4 | 6  | 4.0% | 160883 |
| <a href="#">[View Peptides]</a> | <a href="#">CDC2L1</a>              | cell division cycle 2-like 1 (PITSLRE proteins)                                                         | 2 | 2  | 4.0% | 92707  |
| <a href="#">[View Peptides]</a> | <a href="#">TFRC</a>                | transferrin receptor (p90, CD71)                                                                        | 2 | 3  | 3.9% | 84901  |
| <a href="#">[View Peptides]</a> | <a href="#">PLCB3</a>               | phospholipase C, beta 3 (phosphatidylinositol-specific)                                                 | 3 | 5  | 3.9% | 138799 |
| <a href="#">[View Peptides]</a> | <a href="#">RAD50</a>               | RAD50 homolog (S. cerevisiae)                                                                           | 3 | 3  | 3.9% | 153892 |
| <a href="#">[View Peptides]</a> | <a href="#">POLE</a>                | polymerase (DNA directed), epsilon                                                                      | 5 | 12 | 3.9% | 261529 |
| <a href="#">[View Peptides]</a> | <a href="#">MED1</a>                | mediator complex subunit 1                                                                              | 4 | 4  | 3.8% | 168437 |
| <a href="#">[View Peptides]</a> | <a href="#">ORC3L</a>               | origin recognition complex, subunit 3-like (yeast)                                                      | 2 | 2  | 3.8% | 82254  |
| <a href="#">[View Peptides]</a> | <a href="#">POP1</a>                | processing of precursor 1, ribonuclease P/MRP subunit (S. cerevisiae)                                   | 2 | 2  | 3.6% | 114709 |
| <a href="#">[View Peptides]</a> | <a href="#">EIF5B</a>               | eukaryotic translation initiation factor 5B                                                             | 3 | 4  | 3.6% | 138799 |
| <a href="#">[View Peptides]</a> | <a href="#">SMC1A</a>               | structural maintenance of chromosomes 1A                                                                | 3 | 4  | 3.6% | 143233 |
| <a href="#">[View Peptides]</a> | <a href="#">ACIN1</a>               | apoptotic chromatin condensation inducer 1                                                              | 3 | 4  | 3.6% | 151887 |
| <a href="#">[View Peptides]</a> | <a href="#">ZNF638</a>              | zinc finger protein 638                                                                                 | 4 | 4  | 3.5% | 220623 |
| <a href="#">[View Peptides]</a> | <a href="#">HLTF</a>                | helicase-like transcription factor                                                                      | 2 | 2  | 3.5% | 113928 |
| <a href="#">[View Peptides]</a> | <a href="#">C14orf21</a>            | chromosome 14 open reading frame 21                                                                     | 2 | 3  | 3.5% | 69438  |
| <a href="#">[View Peptides]</a> | <a href="#">PRPF4B</a>              | PRP4 pre-mRNA processing factor 4 homolog B (yeast)                                                     | 2 | 5  | 3.4% | 116973 |
| <a href="#">[View Peptides]</a> | <a href="#">UBE1</a>                | ubiquitin-activating enzyme E1                                                                          | 2 | 2  | 3.4% | 117849 |
| <a href="#">[View Peptides]</a> | <a href="#">POLD1</a>               | polymerase (DNA directed), delta 1, catalytic subunit 125kDa                                            | 2 | 2  | 3.4% | 123631 |
| <a href="#">[View Peptides]</a> | <a href="#">gi 67476986</a>         | gi 67476986 sp Q9BTC0 DIDO1_HUMAN Death-inducer obliterator 1 (DIO-1) (Death-associated transcriptio... | 3 | 3  | 3.4% | 129150 |
| <a href="#">[View Peptides]</a> | <a href="#">ADAR</a>                | adenosine deaminase, RNA-specific                                                                       | 2 | 3  | 3.4% | 135995 |



|                                 |                          |                                                                                                   |   |   |      |        |
|---------------------------------|--------------------------|---------------------------------------------------------------------------------------------------|---|---|------|--------|
| <a href="#">[View Peptides]</a> | <a href="#">RIF1</a>     | RAP1 interacting factor homolog (yeast)                                                           | 5 | 5 | 3.3% | 274464 |
| <a href="#">[View Peptides]</a> | <a href="#">NOL14</a>    | nucleolar protein 14                                                                              | 2 | 2 | 3.3% | 97668  |
| <a href="#">[View Peptides]</a> | <a href="#">ARHGEF15</a> | Rho guanine nucleotide exchange factor (GEF) 15                                                   | 2 | 2 | 3.3% | 91950  |
| <a href="#">[View Peptides]</a> | <a href="#">SMARCA5</a>  | SWI/SNF related, matrix associated, actin dependent regulator of chromatin, subfamily a, member 5 | 2 | 3 | 3.2% | 121905 |
| <a href="#">[View Peptides]</a> | <a href="#">DCTN1</a>    | dynactin 1 (p150, glued homolog, Drosophila)                                                      | 2 | 3 | 3.2% | 141694 |
| <a href="#">[View Peptides]</a> | <a href="#">UBTF</a>     | upstream binding transcription factor, RNA polymerase I                                           | 2 | 3 | 3.1% | 89406  |
| <a href="#">[View Peptides]</a> | <a href="#">KRT77</a>    | keratin 77                                                                                        | 2 | 4 | 3.1% | 61688  |
| <a href="#">[View Peptides]</a> | <a href="#">CHD7</a>     | chromodomain helicase DNA binding protein 7                                                       | 4 | 4 | 3.0% | 252482 |
| <a href="#">[View Peptides]</a> | <a href="#">BAT2</a>     | HLA-B associated transcript 2                                                                     | 4 | 4 | 3.0% | 228858 |
| <a href="#">[View Peptides]</a> | <a href="#">ATXN2L</a>   | ataxin 2-like                                                                                     | 2 | 2 | 3.0% | 113374 |
| <a href="#">[View Peptides]</a> | <a href="#">POLR1B</a>   | polymerase (RNA) I polypeptide B, 128kDa                                                          | 2 | 3 | 2.9% | 122138 |
| <a href="#">[View Peptides]</a> | <a href="#">RRP12</a>    | ribosomal RNA processing 12 homolog (S. cerevisiae)                                               | 2 | 3 | 2.9% | 143702 |
| <a href="#">[View Peptides]</a> | <a href="#">CHD3</a>     | chromodomain helicase DNA binding protein 3                                                       | 3 | 3 | 2.7% | 220690 |
| <a href="#">[View Peptides]</a> | <a href="#">PDCD11</a>   | programmed cell death 11                                                                          | 3 | 4 | 2.7% | 208733 |
| <a href="#">[View Peptides]</a> | <a href="#">STAG2</a>    | stromal antigen 2                                                                                 | 2 | 2 | 2.7% | 141326 |
| <a href="#">[View Peptides]</a> | <a href="#">TMF1</a>     | TATA element modulatory factor 1                                                                  | 2 | 2 | 2.6% | 123171 |
| <a href="#">[View Peptides]</a> | <a href="#">WDR33</a>    | WD repeat domain 33                                                                               | 2 | 3 | 2.4% | 145921 |
| <a href="#">[View Peptides]</a> | <a href="#">VCL</a>      | vinculin                                                                                          | 2 | 2 | 2.4% | 123799 |
| <a href="#">[View Peptides]</a> | <a href="#">DNM1</a>     | dynamamin 1                                                                                       | 2 | 2 | 2.3% | 97407  |
| <a href="#">[View Peptides]</a> | <a href="#">DNM2</a>     | dynamamin 2                                                                                       | 2 | 2 | 2.3% | 98064  |
| <a href="#">[View Peptides]</a> | <a href="#">PCF11</a>    | PCF11, cleavage and polyadenylation factor subunit, homolog (S. cerevisiae)                       | 3 | 3 | 2.3% | 183980 |
| <a href="#">[View Peptides]</a> | <a href="#">TATDN2</a>   | TatD DNase domain containing 2                                                                    | 2 | 2 | 2.2% | 85039  |
| <a href="#">[View Peptides]</a> | <a href="#">PBRM1</a>    | polybromo 1                                                                                       | 2 | 2 | 2.1% | 192946 |
| <a href="#">[View Peptides]</a> | <a href="#">MLLT4</a>    | myeloid/lymphoid or mixed-lineage leukemia (trithorax homolog, Drosophila); translocated to, 4    | 2 | 2 | 1.8% | 205604 |
| <a href="#">[View Peptides]</a> | <a href="#">RRBP1</a>    | ribosome binding protein 1 homolog 180kDa (dog)                                                   | 2 | 2 | 1.8% | 152472 |
| <a href="#">[View Peptides]</a> | <a href="#">THOC2</a>    | THO complex 2                                                                                     | 2 | 3 | 1.7% | 169581 |
| <a href="#">[View Peptides]</a> | <a href="#">TRRAP</a>    | transformation/transcription domain-associated protein                                            | 4 | 4 | 1.7% | 437589 |
| <a href="#">[View Peptides]</a> | <a href="#">BAZ1A</a>    | bromodomain adjacent to zinc finger domain, 1A                                                    | 2 | 2 | 1.6% | 178674 |
| <a href="#">[View Peptides]</a> | <a href="#">UTP20</a>    | UTP20, small subunit (SSU) processome component, homolog (yeast)                                  | 2 | 2 | 1.5% | 318426 |
| <a href="#">[View Peptides]</a> | <a href="#">GCN1L1</a>   | GCN1 general control of amino-acid synthesis 1-like 1 (yeast)                                     | 2 | 3 | 1.5% | 292742 |
| <a href="#">[View Peptides]</a> | <a href="#">NIPBL</a>    | Nipped-B homolog (Drosophila)                                                                     | 2 | 2 | 1.4% | 316051 |
| <a href="#">[View Peptides]</a> | <a href="#">HCFC1</a>    | host cell factor C1 (VP16-accessory protein)                                                      | 2 | 2 | 1.4% | 208840 |
| <a href="#">[View Peptides]</a> | <a href="#">GTF3C1</a>   | general transcription factor IIIC, polypeptide 1, alpha 220kDa                                    | 2 | 3 | 1.2% | 238293 |
| <a href="#">[View Peptides]</a> | <a href="#">ASCC3</a>    | activating signal cointegrator 1 complex subunit 3                                                | 2 | 2 | 1.0% | 251488 |
| <a href="#">[View Peptides]</a> | <a href="#">EPPK1</a>    | epiplakin 1                                                                                       | 2 | 2 | 0.8% | 553102 |

|                                 |                         |                                                         |   |   |      |        |
|---------------------------------|-------------------------|---------------------------------------------------------|---|---|------|--------|
| <a href="#">[View Peptides]</a> | <a href="#">DYNC1H1</a> | dynein, cytoplasmic 1, heavy chain 1                    | 2 | 2 | 0.7% | 532412 |
| <a href="#">[View Peptides]</a> | <a href="#">PLEC1</a>   | plectin 1, intermediate filament binding protein 500kDa | 2 | 3 | 0.7% | 531742 |

---

YRC Informatics Platform - Version 3.0  
Created and Maintained by: [Michael Riffle](#)

Recent pages: [View MS Run \(Yates\)](#) -> [Collaboration Details](#) -> [View MS Run \(Yates\)](#) -> [Collaboration Details](#) -> **[View MS Run \(Yates\)](#)**

## View Mass Spectrometry Run

### Run Information:

Organism: [Homo sapiens](#)  
 Run Date: 2008-03-11  
 Project: [Mechanism of alternative splicing of human insulin receptor](#)  
 DTA SELECT: [Download DTASelect Filter text](#)  
               [Download DTASelect HTML file](#)  
               [Download Unfiltered DTASelect text file](#)  
 Comments: RNA binding splicing regulatory proteins sample: m1  
[\[Edit Comments\]](#)

### FILTERED Run Results: [\[unfilter\]](#)

|                                 | <u>Hit Protein</u>        | <u>Protein Desc</u>                                    | <u>Sequence Count</u> | <u>Spectrum Count</u> | <u>Sequence Coverage</u> | <u>Mol. Wt.</u> |
|---------------------------------|---------------------------|--------------------------------------------------------|-----------------------|-----------------------|--------------------------|-----------------|
| <a href="#">[View Peptides]</a> | <a href="#">ACTG1</a>     | actin, gamma 1                                         | 34                    | 346                   | 63.2%                    | 41793           |
| <a href="#">[View Peptides]</a> | <a href="#">ACTB</a>      | actin, beta                                            | 34                    | 346                   | 61.1%                    | 41737           |
| <a href="#">[View Peptides]</a> | <a href="#">NONO</a>      | non-POU domain containing, octamer-binding             | 65                    | 621                   | 58.6%                    | 54232           |
| <a href="#">[View Peptides]</a> | <a href="#">SNRPD2</a>    | small nuclear ribonucleoprotein D2 polypeptide 16.5kDa | 6                     | 25                    | 52.5%                    | 13527           |
| <a href="#">[View Peptides]</a> | <a href="#">HNRNPA2B1</a> | heterogeneous nuclear ribonucleoprotein A2/B1          | 16                    | 66                    | 52.1%                    | 37430           |
| <a href="#">[View Peptides]</a> | <a href="#">SEPT2</a>     | septin 2                                               | 15                    | 77                    | 49.6%                    | 41487           |
| <a href="#">[View Peptides]</a> | <a href="#">CFL1</a>      | cofilin 1 (non-muscle)                                 | 7                     | 13                    | 48.8%                    | 18502           |
| <a href="#">[View Peptides]</a> | <a href="#">SNRPD3</a>    | small nuclear ribonucleoprotein D3 polypeptide 18kDa   | 5                     | 14                    | 47.6%                    | 13916           |
| <a href="#">[View Peptides]</a> | <a href="#">HNRPH1</a>    | heterogeneous nuclear ribonucleoprotein H1 (H)         | 16                    | 140                   | 45.9%                    | 49229           |
| <a href="#">[View Peptides]</a> | <a href="#">SRP19</a>     | signal recognition particle 19kDa                      | 4                     | 6                     | 43.8%                    | 16186           |
| <a href="#">[View Peptides]</a> | <a href="#">PSMA2</a>     | proteasome (prosome, macropain) subunit, alpha type, 2 | 8                     | 11                    | 43.6%                    | 25899           |
| <a href="#">[View Peptides]</a> | <a href="#">GTF2I</a>     | general transcription factor II, i                     | 56                    | 392                   | 43.5%                    | 112416          |
| <a href="#">[View Peptides]</a> | <a href="#">RPLP2</a>     | ribosomal protein, large, P2                           | 2                     | 2                     | 43.5%                    | 11665           |
| <a href="#">[View Peptides]</a> | <a href="#">PCNA</a>      | proliferating cell nuclear antigen                     | 8                     | 17                    | 42.9%                    | 28769           |

|                                 |                                     |                                                                                                         |    |     |       |        |
|---------------------------------|-------------------------------------|---------------------------------------------------------------------------------------------------------|----|-----|-------|--------|
| <a href="#">[View Peptides]</a> | <a href="#">GAPDH</a>               | glyceraldehyde-3-phosphate dehydrogenase                                                                | 17 | 189 | 42.7% | 36053  |
| <a href="#">[View Peptides]</a> | <a href="#">SEPT9</a>               | septin 9                                                                                                | 25 | 99  | 41.8% | 65369  |
| <a href="#">[View Peptides]</a> | <a href="#">PARP1</a>               | poly (ADP-ribose) polymerase family, member 1                                                           | 44 | 175 | 41.8% | 113084 |
| <a href="#">[View Peptides]</a> | <a href="#">RPL30</a>               | ribosomal protein L30                                                                                   | 3  | 12  | 40.9% | 12784  |
| <a href="#">[View Peptides]</a> | <a href="#">SFPQ</a>                | splicing factor proline/glutamine-rich (polypyrimidine tract binding protein associated)                | 55 | 526 | 40.7% | 76150  |
| <a href="#">[View Peptides]</a> | <a href="#">RPLP0</a>               | ribosomal protein, large, P0                                                                            | 12 | 21  | 40.4% | 34274  |
| <a href="#">[View Peptides]</a> | <a href="#">PKM2</a>                | pyruvate kinase, muscle                                                                                 | 17 | 43  | 39.4% | 57937  |
| <a href="#">[View Peptides]</a> | <a href="#">SEPT7</a>               | septin 7                                                                                                | 14 | 88  | 39.4% | 50680  |
| <a href="#">[View Peptides]</a> | <a href="#">PTBP1</a>               | polypyrimidine tract binding protein 1                                                                  | 17 | 60  | 38.8% | 57221  |
| <a href="#">[View Peptides]</a> | <a href="#">PGK1</a>                | phosphoglycerate kinase 1                                                                               | 12 | 32  | 38.8% | 44615  |
| <a href="#">[View Peptides]</a> | <a href="#">ENO1</a>                | enolase 1, (alpha)                                                                                      | 15 | 46  | 38.7% | 47169  |
| <a href="#">[View Peptides]</a> | <a href="#">ACTN4</a>               | actinin, alpha 4                                                                                        | 28 | 66  | 38.2% | 104854 |
| <a href="#">[View Peptides]</a> | <a href="#">HNRPH2</a>              | heterogeneous nuclear ribonucleoprotein H2 (H')                                                         | 11 | 31  | 38.1% | 49264  |
| <a href="#">[View Peptides]</a> | <a href="#">TUBA4A, TUBA1B</a>      | tubulin, alpha 1b, tubulin, alpha 4a                                                                    | 12 | 31  | 37.3% | 50152  |
| <a href="#">[View Peptides]</a> | <a href="#">TUBA1A</a>              | tubulin, alpha 1a                                                                                       | 12 | 30  | 37.3% | 50136  |
| <a href="#">[View Peptides]</a> | <a href="#">TARDBP</a>              | TAR DNA binding protein                                                                                 | 10 | 18  | 37.0% | 44740  |
| <a href="#">[View Peptides]</a> | <a href="#">SNRPD1</a>              | small nuclear ribonucleoprotein D1 polypeptide 16kDa                                                    | 3  | 28  | 37.0% | 13282  |
| <a href="#">[View Peptides]</a> | <a href="#">NME2</a>                | non-metastatic cells 2, protein (NM23B) expressed in                                                    | 5  | 10  | 36.8% | 17298  |
| <a href="#">[View Peptides]</a> | <a href="#">KRT1</a>                | keratin 1 (epidermolytic hyperkeratosis)                                                                | 20 | 40  | 35.7% | 66018  |
| <a href="#">[View Peptides]</a> | <a href="#">ACTN1</a>               | actinin, alpha 1                                                                                        | 25 | 43  | 35.5% | 103058 |
| <a href="#">[View Peptides]</a> | <a href="#">TUBA4A</a>              | tubulin, alpha 4a                                                                                       | 11 | 19  | 35.3% | 49924  |
| <a href="#">[View Peptides]</a> | <a href="#">RPL9</a>                | ribosomal protein L9                                                                                    | 5  | 14  | 34.9% | 21863  |
| <a href="#">[View Peptides]</a> | <a href="#">ANXA2</a>               | annexin A2                                                                                              | 10 | 31  | 34.2% | 38604  |
| <a href="#">[View Peptides]</a> | <a href="#">YWHAE</a>               | tyrosine 3-monooxygenase/tryptophan 5-monooxygenase activation protein, epsilon polypeptide             | 7  | 18  | 33.3% | 29174  |
| <a href="#">[View Peptides]</a> | <a href="#">SFRS1</a>               | splicing factor, arginine/serine-rich 1 (splicing factor 2, alternate splicing factor)                  | 11 | 89  | 33.1% | 27745  |
| <a href="#">[View Peptides]</a> | <a href="#">HIST1H4L, HIST4H...</a> | histone cluster 2, H4a, histone cluster 1, H4i, histone cluster 1, H4l, histone cluster 1, H4e, hist... | 3  | 4   | 33.0% | 11367  |
| <a href="#">[View Peptides]</a> | <a href="#">NOLA3</a>               | nucleolar protein family A, member 3 (H/ACA small nucleolar RNPs)                                       | 2  | 2   | 32.8% | 7706   |
| <a href="#">[View Peptides]</a> | <a href="#">ALDOA</a>               | aldolase A, fructose-bisphosphate                                                                       | 11 | 37  | 32.7% | 39420  |
| <a href="#">[View Peptides]</a> | <a href="#">HSPA8</a>               | heat shock 70kDa protein 8                                                                              | 19 | 38  | 32.5% | 70898  |
| <a href="#">[View Peptides]</a> | <a href="#">EEF2</a>                | eukaryotic translation elongation factor 2                                                              | 26 | 50  | 32.5% | 95338  |
| <a href="#">[View Peptides]</a> | <a href="#">FLNA</a>                | filamin A, alpha (actin binding protein 280)                                                            | 66 | 167 | 32.2% | 280759 |
| <a href="#">[View Peptides]</a> | <a href="#">LDHB</a>                | lactate dehydrogenase B                                                                                 | 9  | 23  | 32.0% | 36639  |
| <a href="#">[View Peptides]</a> | <a href="#">PPP1CC</a>              | protein phosphatase 1, catalytic subunit, gamma isoform                                                 | 9  | 92  | 31.9% | 36984  |

|                                 |                                     |                                                                                                         |    |     |       |        |
|---------------------------------|-------------------------------------|---------------------------------------------------------------------------------------------------------|----|-----|-------|--------|
| <a href="#">[View Peptides]</a> | <a href="#">SEPT10</a>              | septin 10                                                                                               | 13 | 37  | 31.5% | 59982  |
| <a href="#">[View Peptides]</a> | <a href="#">PPP1CA</a>              | protein phosphatase 1, catalytic subunit, alpha isoform                                                 | 9  | 91  | 31.5% | 37512  |
| <a href="#">[View Peptides]</a> | <a href="#">SYNCRIP</a>             | synaptotagmin binding, cytoplasmic RNA interacting protein                                              | 14 | 34  | 31.3% | 69633  |
| <a href="#">[View Peptides]</a> | <a href="#">WDR74</a>               | WD repeat domain 74                                                                                     | 7  | 10  | 31.2% | 42441  |
| <a href="#">[View Peptides]</a> | <a href="#">EIF2S1</a>              | eukaryotic translation initiation factor 2, subunit 1 alpha, 35kDa                                      | 7  | 8   | 31.1% | 36112  |
| <a href="#">[View Peptides]</a> | <a href="#">THOC4</a>               | THO complex 4                                                                                           | 5  | 15  | 31.1% | 26888  |
| <a href="#">[View Peptides]</a> | <a href="#">RPL12</a>               | ribosomal protein L12                                                                                   | 3  | 8   | 30.9% | 17819  |
| <a href="#">[View Peptides]</a> | <a href="#">PACSIN3</a>             | protein kinase C and casein kinase substrate in neurons 3                                               | 13 | 43  | 30.7% | 48487  |
| <a href="#">[View Peptides]</a> | <a href="#">CCT3</a>                | chaperonin containing TCP1, subunit 3 (gamma)                                                           | 12 | 18  | 30.3% | 60534  |
| <a href="#">[View Peptides]</a> | <a href="#">SNRPA1</a>              | small nuclear ribonucleoprotein polypeptide A'                                                          | 4  | 7   | 30.2% | 28416  |
| <a href="#">[View Peptides]</a> | <a href="#">HNRNPL</a>              | heterogeneous nuclear ribonucleoprotein L                                                               | 11 | 23  | 30.1% | 60187  |
| <a href="#">[View Peptides]</a> | <a href="#">EIF4A1</a>              | eukaryotic translation initiation factor 4A, isoform 1                                                  | 10 | 18  | 30.0% | 46154  |
| <a href="#">[View Peptides]</a> | <a href="#">SND1</a>                | staphylococcal nuclease and tudor domain containing 1                                                   | 26 | 94  | 29.7% | 101997 |
| <a href="#">[View Peptides]</a> | <a href="#">PSMB4</a>               | proteasome (prosome, macropain) subunit, beta type, 4                                                   | 4  | 8   | 29.5% | 29192  |
| <a href="#">[View Peptides]</a> | <a href="#">SF3A3</a>               | splicing factor 3a, subunit 3, 60kDa                                                                    | 12 | 21  | 29.3% | 58849  |
| <a href="#">[View Peptides]</a> | <a href="#">YWHAZ</a>               | tyrosine 3-monooxygenase/tryptophan 5-monooxygenase activation protein, zeta polypeptide                | 6  | 19  | 29.0% | 27745  |
| <a href="#">[View Peptides]</a> | <a href="#">gi 21619210, gi ...</a> | pir  MOHULP myosin regulatory light chain, placental - human , gi 5453740 ref NP_006462.1  myosin re... | 3  | 6   | 28.7% | 19794  |
| <a href="#">[View Peptides]</a> | <a href="#">CLIC1</a>               | chloride intracellular channel 1                                                                        | 4  | 9   | 28.6% | 26923  |
| <a href="#">[View Peptides]</a> | <a href="#">RPL36</a>               | ribosomal protein L36                                                                                   | 4  | 6   | 28.6% | 12254  |
| <a href="#">[View Peptides]</a> | <a href="#">ACTG2</a>               | actin, gamma 2, smooth muscle, enteric                                                                  | 13 | 49  | 28.5% | 41877  |
| <a href="#">[View Peptides]</a> | <a href="#">ACTC1</a>               | actin, alpha, cardiac muscle 1                                                                          | 13 | 49  | 28.4% | 42019  |
| <a href="#">[View Peptides]</a> | <a href="#">ACTA2</a>               | actin, alpha 2, smooth muscle, aorta                                                                    | 13 | 49  | 28.4% | 42009  |
| <a href="#">[View Peptides]</a> | <a href="#">HMGB1</a>               | high-mobility group box 1                                                                               | 6  | 8   | 28.4% | 24894  |
| <a href="#">[View Peptides]</a> | <a href="#">ACTA1</a>               | actin, alpha 1, skeletal muscle                                                                         | 13 | 49  | 28.4% | 42051  |
| <a href="#">[View Peptides]</a> | <a href="#">CFL2</a>                | cofilin 2 (muscle)                                                                                      | 4  | 5   | 28.3% | 18737  |
| <a href="#">[View Peptides]</a> | <a href="#">SUB1</a>                | SUB1 homolog (S. cerevisiae)                                                                            | 4  | 16  | 28.3% | 14395  |
| <a href="#">[View Peptides]</a> | <a href="#">HNRNPR</a>              | heterogeneous nuclear ribonucleoprotein R                                                               | 15 | 35  | 28.1% | 70943  |
| <a href="#">[View Peptides]</a> | <a href="#">EXOSC7</a>              | exosome component 7                                                                                     | 6  | 8   | 27.8% | 31835  |
| <a href="#">[View Peptides]</a> | <a href="#">SPTAN1</a>              | spectrin, alpha, non-erythrocytic 1 (alpha-fodrin)                                                      | 49 | 135 | 27.8% | 284526 |
| <a href="#">[View Peptides]</a> | <a href="#">HSP90AB1</a>            | heat shock protein 90kDa alpha (cytosolic), class B member 1                                            | 13 | 33  | 27.6% | 83264  |
| <a href="#">[View Peptides]</a> | <a href="#">PSMB1</a>               | proteasome (prosome, macropain) subunit, beta type, 1                                                   | 4  | 10  | 27.4% | 26489  |
| <a href="#">[View Peptides]</a> | <a href="#">PSMA7</a>               | proteasome (prosome, macropain) subunit, alpha type, 7                                                  | 5  | 6   | 27.4% | 27887  |
| <a href="#">[View Peptides]</a> | <a href="#">EFTUD2</a>              | elongation factor Tu GTP binding domain containing 2                                                    | 19 | 33  | 27.0% | 109436 |
| <a href="#">[View Peptides]</a> | <a href="#">APOBEC3C</a>            | apolipoprotein B mRNA editing enzyme, catalytic polypeptide-like 3C                                     | 3  | 5   | 26.8% | 22826  |

|                                 |                                     |                                                                                                         |    |    |       |        |
|---------------------------------|-------------------------------------|---------------------------------------------------------------------------------------------------------|----|----|-------|--------|
| <a href="#">[View Peptides]</a> | <a href="#">YWHAB</a>               | tyrosine 3-monooxygenase/tryptophan 5-monooxygenase activation protein, beta polypeptide                | 5  | 9  | 26.8% | 28082  |
| <a href="#">[View Peptides]</a> | <a href="#">CIRBP</a>               | cold inducible RNA binding protein                                                                      | 4  | 16 | 26.7% | 18648  |
| <a href="#">[View Peptides]</a> | <a href="#">VCP</a>                 | valosin-containing protein                                                                              | 15 | 38 | 26.6% | 89322  |
| <a href="#">[View Peptides]</a> | <a href="#">EIF5AP1, EIF5A</a>      | eukaryotic translation initiation factor 5A pseudogene 1, eukaryotic translation initiation factor 5... | 2  | 3  | 26.6% | 16832  |
| <a href="#">[View Peptides]</a> | <a href="#">TAGLN2</a>              | transgelin 2                                                                                            | 3  | 7  | 26.6% | 22391  |
| <a href="#">[View Peptides]</a> | <a href="#">LRPPRC</a>              | leucine-rich PPR-motif containing                                                                       | 22 | 44 | 26.5% | 145201 |
| <a href="#">[View Peptides]</a> | <a href="#">RPS8</a>                | ribosomal protein S8                                                                                    | 4  | 8  | 26.4% | 24205  |
| <a href="#">[View Peptides]</a> | <a href="#">PCBP1</a>               | poly(rC) binding protein 1                                                                              | 7  | 13 | 26.4% | 37498  |
| <a href="#">[View Peptides]</a> | <a href="#">SNRPG</a>               | small nuclear ribonucleoprotein polypeptide G                                                           | 4  | 5  | 26.3% | 8496   |
| <a href="#">[View Peptides]</a> | <a href="#">TPI1</a>                | triosephosphate isomerase 1                                                                             | 4  | 7  | 26.1% | 26669  |
| <a href="#">[View Peptides]</a> | <a href="#">RUVBL1</a>              | RuvB-like 1 (E. coli)                                                                                   | 7  | 10 | 26.1% | 50228  |
| <a href="#">[View Peptides]</a> | <a href="#">PPIB</a>                | peptidylprolyl isomerase B (cyclophilin B)                                                              | 6  | 14 | 26.0% | 22742  |
| <a href="#">[View Peptides]</a> | <a href="#">RAN</a>                 | RAN, member RAS oncogene family                                                                         | 7  | 8  | 25.9% | 24423  |
| <a href="#">[View Peptides]</a> | <a href="#">MAP4</a>                | microtubule-associated protein 4                                                                        | 24 | 49 | 25.8% | 121019 |
| <a href="#">[View Peptides]</a> | <a href="#">EMG1</a>                | EMG1 nucleolar protein homolog (S. cerevisiae)                                                          | 5  | 7  | 25.8% | 26720  |
| <a href="#">[View Peptides]</a> | <a href="#">EIF4H</a>               | eukaryotic translation initiation factor 4H                                                             | 4  | 17 | 25.8% | 27385  |
| <a href="#">[View Peptides]</a> | <a href="#">IQGAP1</a>              | IQ motif containing GTPase activating protein 1                                                         | 29 | 55 | 25.8% | 189251 |
| <a href="#">[View Peptides]</a> | <a href="#">CALR</a>                | calreticulin                                                                                            | 7  | 16 | 25.7% | 48142  |
| <a href="#">[View Peptides]</a> | <a href="#">PDIA6</a>               | protein disulfide isomerase family A, member 6                                                          | 6  | 13 | 25.7% | 48121  |
| <a href="#">[View Peptides]</a> | <a href="#">RPL7A</a>               | ribosomal protein L7a                                                                                   | 7  | 19 | 25.6% | 29996  |
| <a href="#">[View Peptides]</a> | <a href="#">RPL18</a>               | ribosomal protein L18                                                                                   | 5  | 11 | 25.5% | 21634  |
| <a href="#">[View Peptides]</a> | <a href="#">gi 41019521</a>         | sp Q9NR30 DD21_HUMAN Nucleolar RNA helicase II (Nucleolar RNA helicase Gu) (RH II/Gu) (DEAD-box prot... | 19 | 44 | 25.4% | 87357  |
| <a href="#">[View Peptides]</a> | <a href="#">DDX1</a>                | DEAD (Asp-Glu-Ala-Asp) box polypeptide 1                                                                | 12 | 43 | 25.4% | 82432  |
| <a href="#">[View Peptides]</a> | <a href="#">RPL23</a>               | ribosomal protein L23                                                                                   | 2  | 9  | 25.0% | 14865  |
| <a href="#">[View Peptides]</a> | <a href="#">gi 545257, gi 21...</a> | sp P35527 K1CI_HUMAN Keratin, type I cytoskeletal 9 (Cytokeratin 9) (K9) (CK 9) , gi 545257 gb AAC60... | 11 | 27 | 24.9% | 61987  |
| <a href="#">[View Peptides]</a> | <a href="#">PGAM1</a>               | phosphoglycerate mutase 1 (brain)                                                                       | 5  | 7  | 24.8% | 28804  |
| <a href="#">[View Peptides]</a> | <a href="#">PSMA6</a>               | proteasome (prosome, macropain) subunit, alpha type, 6                                                  | 4  | 4  | 24.8% | 27399  |
| <a href="#">[View Peptides]</a> | <a href="#">SEPT11</a>              | septin 11                                                                                               | 15 | 42 | 24.5% | 49398  |
| <a href="#">[View Peptides]</a> | <a href="#">RPL4</a>                | ribosomal protein L4                                                                                    | 11 | 19 | 24.4% | 47697  |
| <a href="#">[View Peptides]</a> | <a href="#">SEPT6</a>               | septin 6                                                                                                | 12 | 29 | 24.4% | 49717  |
| <a href="#">[View Peptides]</a> | <a href="#">DDX5</a>                | DEAD (Asp-Glu-Ala-Asp) box polypeptide 5                                                                | 14 | 28 | 24.3% | 69148  |
| <a href="#">[View Peptides]</a> | <a href="#">CCT4</a>                | chaperonin containing TCP1, subunit 4 (delta)                                                           | 8  | 17 | 24.3% | 57924  |
| <a href="#">[View Peptides]</a> | <a href="#">BUB3</a>                | BUB3 budding uninhibited by benzimidazoles 3 homolog (yeast)                                            | 5  | 5  | 24.1% | 37155  |
| <a href="#">[View Peptides]</a> | <a href="#">SERBP1</a>              | SERPINE1 mRNA binding protein 1                                                                         | 9  | 19 | 24.0% | 44965  |

|                                 |                                      |                                                                                                         |    |    |       |        |
|---------------------------------|--------------------------------------|---------------------------------------------------------------------------------------------------------|----|----|-------|--------|
| <a href="#">[View Peptides]</a> | <a href="#">HSPA1A, HSPA1B</a>       | heat shock 70kDa protein 1B, heat shock 70kDa protein 1A                                                | 9  | 14 | 23.9% | 70052  |
| <a href="#">[View Peptides]</a> | <a href="#">NPM1</a>                 | nucleophosmin (nucleolar phosphoprotein B23, numatrin)                                                  | 7  | 37 | 23.8% | 32575  |
| <a href="#">[View Peptides]</a> | <a href="#">XRN2</a>                 | 5'-3' exoribonuclease 2                                                                                 | 15 | 37 | 23.7% | 108583 |
| <a href="#">[View Peptides]</a> | <a href="#">RPS5</a>                 | ribosomal protein S5                                                                                    | 3  | 6  | 23.5% | 22876  |
| <a href="#">[View Peptides]</a> | <a href="#">HSPA5</a>                | heat shock 70kDa protein 5 (glucose-regulated protein, 78kDa)                                           | 12 | 21 | 23.2% | 72333  |
| <a href="#">[View Peptides]</a> | <a href="#">MSN</a>                  | moesin                                                                                                  | 13 | 26 | 23.2% | 67820  |
| <a href="#">[View Peptides]</a> | <a href="#">CCT7</a>                 | chaperonin containing TCP1, subunit 7 (eta)                                                             | 9  | 22 | 23.0% | 59367  |
| <a href="#">[View Peptides]</a> | <a href="#">DHX15</a>                | DEAH (Asp-Glu-Ala-His) box polypeptide 15                                                               | 12 | 29 | 22.8% | 90933  |
| <a href="#">[View Peptides]</a> | <a href="#">EIF2S3</a>               | eukaryotic translation initiation factor 2, subunit 3 gamma, 52kDa                                      | 8  | 11 | 22.7% | 51110  |
| <a href="#">[View Peptides]</a> | <a href="#">RCC2</a>                 | regulator of chromosome condensation 2                                                                  | 8  | 11 | 22.6% | 56085  |
| <a href="#">[View Peptides]</a> | <a href="#">PPP1CB</a>               | protein phosphatase 1, catalytic subunit, beta isoform                                                  | 6  | 67 | 22.6% | 37187  |
| <a href="#">[View Peptides]</a> | <a href="#">gi 119621172, gi ...</a> | gi 9963797 gb AAG09698.1 AF184213_1 ht006 protein [Homo sapiens], gi 88192892 pdb 2F9D B Chain B, 2.... | 2  | 2  | 22.4% | 14585  |
| <a href="#">[View Peptides]</a> | <a href="#">SPTBN1</a>               | spectrin, beta, non-erythrocytic 1                                                                      | 35 | 64 | 22.2% | 274630 |
| <a href="#">[View Peptides]</a> | <a href="#">M6PRBP1</a>              | mannose-6-phosphate receptor binding protein 1                                                          | 5  | 7  | 22.1% | 47047  |
| <a href="#">[View Peptides]</a> | <a href="#">CCT2</a>                 | chaperonin containing TCP1, subunit 2 (beta)                                                            | 9  | 19 | 22.1% | 57488  |
| <a href="#">[View Peptides]</a> | <a href="#">PRPF19</a>               | PRP19/PSO4 pre-mRNA processing factor 19 homolog (S. cerevisiae)                                        | 9  | 23 | 22.0% | 55181  |
| <a href="#">[View Peptides]</a> | <a href="#">ANXA1</a>                | annexin A1                                                                                              | 5  | 9  | 21.7% | 38714  |
| <a href="#">[View Peptides]</a> | <a href="#">PSMA5</a>                | proteasome (prosome, macropain) subunit, alpha type, 5                                                  | 3  | 3  | 21.6% | 26411  |
| <a href="#">[View Peptides]</a> | <a href="#">ARPC1B</a>               | actin related protein 2/3 complex, subunit 1B, 41kDa                                                    | 5  | 9  | 21.5% | 40950  |
| <a href="#">[View Peptides]</a> | <a href="#">ANXA5</a>                | annexin A5                                                                                              | 5  | 8  | 21.2% | 35937  |
| <a href="#">[View Peptides]</a> | <a href="#">LDHA</a>                 | lactate dehydrogenase A                                                                                 | 5  | 13 | 20.8% | 36689  |
| <a href="#">[View Peptides]</a> | <a href="#">DDX39</a>                | DEAD (Asp-Glu-Ala-Asp) box polypeptide 39                                                               | 9  | 19 | 20.8% | 49130  |
| <a href="#">[View Peptides]</a> | <a href="#">DDX17</a>                | DEAD (Asp-Glu-Ala-Asp) box polypeptide 17                                                               | 12 | 23 | 20.8% | 72372  |
| <a href="#">[View Peptides]</a> | <a href="#">TARS</a>                 | threonyl-tRNA synthetase                                                                                | 10 | 17 | 20.7% | 83435  |
| <a href="#">[View Peptides]</a> | <a href="#">gi 59797947, gi ...</a>  | gi 59797947 sp Q8IUH3 DRBP1_HUMAN Developmentally-regulated RNA-binding protein 1 (RB-1), gi 2283132... | 6  | 9  | 20.4% | 53503  |
| <a href="#">[View Peptides]</a> | <a href="#">EXOSC8</a>               | exosome component 8                                                                                     | 3  | 5  | 20.3% | 30040  |
| <a href="#">[View Peptides]</a> | <a href="#">HNRNPA1</a>              | heterogeneous nuclear ribonucleoprotein A1                                                              | 9  | 25 | 20.2% | 38846  |
| <a href="#">[View Peptides]</a> | <a href="#">U2AF2</a>                | U2 small nuclear RNA auxiliary factor 2                                                                 | 5  | 14 | 20.2% | 53501  |
| <a href="#">[View Peptides]</a> | <a href="#">RPS6</a>                 | ribosomal protein S6                                                                                    | 4  | 5  | 20.1% | 28681  |
| <a href="#">[View Peptides]</a> | <a href="#">WDR5</a>                 | WD repeat domain 5                                                                                      | 5  | 6  | 20.1% | 36589  |
| <a href="#">[View Peptides]</a> | <a href="#">RFC4</a>                 | replication factor C (activator 1) 4, 37kDa                                                             | 6  | 8  | 20.1% | 39682  |
| <a href="#">[View Peptides]</a> | <a href="#">EEF1A1</a>               | eukaryotic translation elongation factor 1 alpha 1                                                      | 10 | 18 | 20.1% | 50141  |

|                                 |                                     |                                                                                                         |    |     |       |        |
|---------------------------------|-------------------------------------|---------------------------------------------------------------------------------------------------------|----|-----|-------|--------|
| <a href="#">[View Peptides]</a> | <a href="#">KRT10</a>               | keratin 10 (epidermolytic hyperkeratosis; keratosis palmaris et plantaris)                              | 10 | 25  | 20.1% | 59519  |
| <a href="#">[View Peptides]</a> | <a href="#">HNRPM</a>               | heterogeneous nuclear ribonucleoprotein M                                                               | 12 | 17  | 20.1% | 77516  |
| <a href="#">[View Peptides]</a> | <a href="#">TCP1</a>                | t-complex 1                                                                                             | 8  | 21  | 20.0% | 60344  |
| <a href="#">[View Peptides]</a> | <a href="#">WDR3</a>                | WD repeat domain 3                                                                                      | 12 | 16  | 19.9% | 106099 |
| <a href="#">[View Peptides]</a> | <a href="#">RPL18A</a>              | ribosomal protein L18a                                                                                  | 3  | 5   | 19.9% | 20762  |
| <a href="#">[View Peptides]</a> | <a href="#">HNRPA3</a>              | heterogeneous nuclear ribonucleoprotein A3                                                              | 6  | 12  | 19.8% | 39595  |
| <a href="#">[View Peptides]</a> | <a href="#">TUBB</a>                | tubulin, beta                                                                                           | 7  | 18  | 19.8% | 49671  |
| <a href="#">[View Peptides]</a> | <a href="#">DHX9</a>                | DEAH (Asp-Glu-Ala-His) box polypeptide 9                                                                | 19 | 49  | 19.8% | 140881 |
| <a href="#">[View Peptides]</a> | <a href="#">CKB</a>                 | creatine kinase, brain                                                                                  | 4  | 7   | 19.7% | 42644  |
| <a href="#">[View Peptides]</a> | <a href="#">DENR</a>                | density-regulated protein                                                                               | 2  | 2   | 19.7% | 22092  |
| <a href="#">[View Peptides]</a> | <a href="#">gi 230867, gi 23...</a> | gi 230868 pdb 3GPD G Chain G, Twinning In Crystals Of Human Skeletal Muscle D- Glyceraldehyde-3-Phos... | 8  | 17  | 19.5% | 35876  |
| <a href="#">[View Peptides]</a> | <a href="#">PCBP2</a>               | poly(rC) binding protein 2                                                                              | 5  | 6   | 19.5% | 38580  |
| <a href="#">[View Peptides]</a> | <a href="#">TIAL1</a>               | TIA1 cytotoxic granule-associated RNA binding protein-like 1                                            | 5  | 12  | 19.5% | 41591  |
| <a href="#">[View Peptides]</a> | <a href="#">TRIM28</a>              | tripartite motif-containing 28                                                                          | 9  | 21  | 19.5% | 88550  |
| <a href="#">[View Peptides]</a> | <a href="#">FLNB</a>                | filamin B, beta (actin binding protein 278)                                                             | 32 | 65  | 19.4% | 278193 |
| <a href="#">[View Peptides]</a> | <a href="#">HSP90B1</a>             | heat shock protein 90kDa beta (Grp94), member 1                                                         | 12 | 16  | 19.3% | 92469  |
| <a href="#">[View Peptides]</a> | <a href="#">VIM</a>                 | vimentin                                                                                                | 6  | 10  | 19.3% | 53652  |
| <a href="#">[View Peptides]</a> | <a href="#">RPS20</a>               | ribosomal protein S20                                                                                   | 2  | 2   | 19.3% | 13373  |
| <a href="#">[View Peptides]</a> | <a href="#">PSMB5</a>               | proteasome (prosome, macropain) subunit, beta type, 5                                                   | 3  | 3   | 19.2% | 22897  |
| <a href="#">[View Peptides]</a> | <a href="#">CCT8</a>                | chaperonin containing TCP1, subunit 8 (theta)                                                           | 8  | 18  | 19.2% | 59621  |
| <a href="#">[View Peptides]</a> | <a href="#">CDC5L</a>               | CDC5 cell division cycle 5-like (S. pombe)                                                              | 10 | 19  | 19.1% | 92251  |
| <a href="#">[View Peptides]</a> | <a href="#">RFC5</a>                | replication factor C (activator 1) 5, 36.5kDa                                                           | 4  | 7   | 19.1% | 38497  |
| <a href="#">[View Peptides]</a> | <a href="#">RUVBL2</a>              | RuvB-like 2 (E. coli)                                                                                   | 7  | 12  | 19.0% | 51157  |
| <a href="#">[View Peptides]</a> | <a href="#">HNRPK</a>               | heterogeneous nuclear ribonucleoprotein K                                                               | 7  | 16  | 19.0% | 50976  |
| <a href="#">[View Peptides]</a> | <a href="#">DDB2</a>                | damage-specific DNA binding protein 2, 48kDa                                                            | 5  | 11  | 18.7% | 47864  |
| <a href="#">[View Peptides]</a> | <a href="#">BAT1</a>                | HLA-B associated transcript 1                                                                           | 8  | 24  | 18.7% | 48991  |
| <a href="#">[View Peptides]</a> | <a href="#">gi 6469388, gi 2...</a> | emb CAB61788.1  dJ18C9.3 (novel protein similar to high mobility group protein 2A (HMG2A) ) [Homo sa... | 3  | 3   | 18.6% | 20854  |
| <a href="#">[View Peptides]</a> | <a href="#">G3BP1</a>               | GTPase activating protein (SH3 domain) binding protein 1                                                | 7  | 16  | 18.5% | 52164  |
| <a href="#">[View Peptides]</a> | <a href="#">ALDOC</a>               | aldolase C, fructose-bisphosphate                                                                       | 5  | 20  | 18.4% | 39456  |
| <a href="#">[View Peptides]</a> | <a href="#">PRKDC</a>               | protein kinase, DNA-activated, catalytic polypeptide                                                    | 55 | 161 | 18.3% | 469093 |
| <a href="#">[View Peptides]</a> | <a href="#">SF3A1</a>               | splicing factor 3a, subunit 1, 120kDa                                                                   | 11 | 23  | 18.2% | 88886  |
| <a href="#">[View Peptides]</a> | <a href="#">GSTM3</a>               | glutathione S-transferase M3 (brain)                                                                    | 3  | 5   | 18.2% | 26560  |
| <a href="#">[View Peptides]</a> | <a href="#">CSNK2B</a>              | casein kinase 2, beta polypeptide                                                                       | 2  | 5   | 18.1% | 24942  |
| <a href="#">[View Peptides]</a> | <a href="#">RFC2</a>                | replication factor C (activator 1) 2, 40kDa                                                             | 4  | 9   | 18.1% | 39157  |
| <a href="#">[View Peptides]</a> | <a href="#">CCT6A</a>               | chaperonin containing TCP1, subunit 6A (zeta 1)                                                         | 8  | 20  | 18.1% | 58024  |



|                                 |                                     |                                                                                                         |    |    |       |        |
|---------------------------------|-------------------------------------|---------------------------------------------------------------------------------------------------------|----|----|-------|--------|
| <a href="#">[View Peptides]</a> | <a href="#">XRCC6</a>               | X-ray repair complementing defective repair in Chinese hamster cells 6 (Ku autoantigen, 70kDa)          | 7  | 18 | 18.1% | 69843  |
| <a href="#">[View Peptides]</a> | <a href="#">RPL11</a>               | ribosomal protein L11                                                                                   | 2  | 4  | 18.0% | 20252  |
| <a href="#">[View Peptides]</a> | <a href="#">gi 40254816, gi ...</a> | gi 40254816 ref NP_005339.2  heat shock protein 90kDa alpha (cytosolic), class A member 1 isoform 2 ... | 10 | 24 | 17.9% | 84674  |
| <a href="#">[View Peptides]</a> | <a href="#">YWHAH</a>               | tyrosine 3-monooxygenase/tryptophan 5-monooxygenase activation protein, eta polypeptide                 | 4  | 5  | 17.9% | 28219  |
| <a href="#">[View Peptides]</a> | <a href="#">EXOSC2</a>              | exosome component 2                                                                                     | 3  | 7  | 17.7% | 32789  |
| <a href="#">[View Peptides]</a> | <a href="#">SFRS10</a>              | splicing factor, arginine/serine-rich 10 (transformer 2 homolog, Drosophila)                            | 5  | 34 | 17.7% | 33666  |
| <a href="#">[View Peptides]</a> | <a href="#">gi 119717, gi 48...</a> | pir  A34400 ezrin [validated] - human , gi 31283 emb CAA35893.1  unnamed protein product [Homo sapie... | 10 | 18 | 17.7% | 69399  |
| <a href="#">[View Peptides]</a> | <a href="#">SRP14</a>               | signal recognition particle 14kDa (homologous Alu RNA binding protein)                                  | 2  | 7  | 17.6% | 14544  |
| <a href="#">[View Peptides]</a> | <a href="#">GSTP1</a>               | glutathione S-transferase pi                                                                            | 2  | 2  | 17.6% | 23356  |
| <a href="#">[View Peptides]</a> | <a href="#">FEN1</a>                | flap structure-specific endonuclease 1                                                                  | 5  | 11 | 17.6% | 42593  |
| <a href="#">[View Peptides]</a> | <a href="#">KRT6A</a>               | keratin 6A                                                                                              | 9  | 11 | 17.6% | 60045  |
| <a href="#">[View Peptides]</a> | <a href="#">gi 2119222, gi 9...</a> | gi 908801 gb AAC41769.1  keratin type II, pir  I61768 keratin 6c, type II - human, gi 17505189 ref N... | 9  | 11 | 17.6% | 60200  |
| <a href="#">[View Peptides]</a> | <a href="#">NARS</a>                | asparaginyl-tRNA synthetase                                                                             | 6  | 10 | 17.5% | 62943  |
| <a href="#">[View Peptides]</a> | <a href="#">ANP32E</a>              | acidic (leucine-rich) nuclear phosphoprotein 32 family, member E                                        | 3  | 5  | 17.5% | 30692  |
| <a href="#">[View Peptides]</a> | <a href="#">HDGF</a>                | hepatoma-derived growth factor (high-mobility group protein 1-like)                                     | 3  | 10 | 17.5% | 26788  |
| <a href="#">[View Peptides]</a> | <a href="#">RPL23A</a>              | ribosomal protein L23a                                                                                  | 2  | 3  | 17.3% | 17695  |
| <a href="#">[View Peptides]</a> | <a href="#">KCTD14</a>              | potassium channel tetramerisation domain containing 14                                                  | 3  | 5  | 17.3% | 26188  |
| <a href="#">[View Peptides]</a> | <a href="#">CORO1C</a>              | coronin, actin binding protein, 1C                                                                      | 7  | 14 | 17.3% | 53249  |
| <a href="#">[View Peptides]</a> | <a href="#">WDR36</a>               | WD repeat domain 36                                                                                     | 11 | 16 | 17.2% | 105322 |
| <a href="#">[View Peptides]</a> | <a href="#">KPNA2</a>               | karyopherin alpha 2 (RAG cohort 1, importin alpha 1)                                                    | 5  | 9  | 17.2% | 57862  |
| <a href="#">[View Peptides]</a> | <a href="#">SFRS7</a>               | splicing factor, arginine/serine-rich 7, 35kDa                                                          | 5  | 21 | 17.2% | 27367  |
| <a href="#">[View Peptides]</a> | <a href="#">NIP7</a>                | nuclear import 7 homolog (S. cerevisiae)                                                                | 2  | 2  | 17.2% | 20463  |
| <a href="#">[View Peptides]</a> | <a href="#">PFN1</a>                | profilin 1                                                                                              | 2  | 3  | 17.1% | 15054  |
| <a href="#">[View Peptides]</a> | <a href="#">POLR1C</a>              | polymerase (RNA) I polypeptide C, 30kDa                                                                 | 4  | 9  | 17.1% | 39250  |
| <a href="#">[View Peptides]</a> | <a href="#">TUBB2C</a>              | tubulin, beta 2C                                                                                        | 6  | 10 | 17.1% | 49831  |
| <a href="#">[View Peptides]</a> | <a href="#">TUBB3, TUBB4</a>        | tubulin, beta 4, tubulin, beta 3                                                                        | 6  | 12 | 16.9% | 50433  |
| <a href="#">[View Peptides]</a> | <a href="#">gi 51338655</a>         | gi 51338655 sp P62861 RS30_HUMAN 40S ribosomal protein S30                                              | 2  | 2  | 16.9% | 6648   |
| <a href="#">[View Peptides]</a> | <a href="#">C14orf166</a>           | chromosome 14 open reading frame 166                                                                    | 3  | 5  | 16.8% | 28068  |
| <a href="#">[View Peptides]</a> | <a href="#">EIF2S2</a>              | eukaryotic translation initiation factor 2, subunit 2 beta, 38kDa                                       | 3  | 4  | 16.8% | 38388  |
| <a href="#">[View Peptides]</a> | <a href="#">PA2G4</a>               | proliferation-associated 2G4, 38kDa                                                                     | 6  | 9  | 16.8% | 43787  |
| <a href="#">[View Peptides]</a> | <a href="#">EIF4A3</a>              | eukaryotic translation initiation factor 4A, isoform 3                                                  | 4  | 5  | 16.8% | 46871  |

|                                 |                          |                                                                                    |    |    |       |        |
|---------------------------------|--------------------------|------------------------------------------------------------------------------------|----|----|-------|--------|
| <a href="#">[View Peptides]</a> | <a href="#">HDAC1</a>    | histone deacetylase 1                                                              | 5  | 7  | 16.8% | 55103  |
| <a href="#">[View Peptides]</a> | <a href="#">SFRS9</a>    | splicing factor, arginine/serine-rich 9                                            | 4  | 16 | 16.7% | 25542  |
| <a href="#">[View Peptides]</a> | <a href="#">ATIC</a>     | 5-aminoimidazole-4-carboxamide ribonucleotide formyltransferase/IMP cyclohydrolase | 5  | 10 | 16.6% | 64616  |
| <a href="#">[View Peptides]</a> | <a href="#">RPL10A</a>   | ribosomal protein L10a                                                             | 3  | 12 | 16.6% | 24831  |
| <a href="#">[View Peptides]</a> | <a href="#">DSTN</a>     | destrin (actin depolymerizing factor)                                              | 2  | 2  | 16.4% | 18506  |
| <a href="#">[View Peptides]</a> | <a href="#">RAB1B</a>    | RAB1B, member RAS oncogene family                                                  | 2  | 2  | 16.4% | 22171  |
| <a href="#">[View Peptides]</a> | <a href="#">EEF1B2</a>   | eukaryotic translation elongation factor 1 beta 2                                  | 3  | 7  | 16.4% | 24764  |
| <a href="#">[View Peptides]</a> | <a href="#">TKT</a>      | transketolase (Wernicke-Korsakoff syndrome)                                        | 6  | 12 | 16.4% | 67878  |
| <a href="#">[View Peptides]</a> | <a href="#">FKBP4</a>    | FK506 binding protein 4, 59kDa                                                     | 5  | 5  | 16.3% | 51805  |
| <a href="#">[View Peptides]</a> | <a href="#">ACTL6A</a>   | actin-like 6A                                                                      | 5  | 6  | 16.3% | 47461  |
| <a href="#">[View Peptides]</a> | <a href="#">POLDIP3</a>  | polymerase (DNA-directed), delta interacting protein 3                             | 4  | 8  | 16.2% | 46089  |
| <a href="#">[View Peptides]</a> | <a href="#">RAB1A</a>    | RAB1A, member RAS oncogene family                                                  | 2  | 3  | 16.1% | 22678  |
| <a href="#">[View Peptides]</a> | <a href="#">VDAC2</a>    | voltage-dependent anion channel 2                                                  | 3  | 4  | 16.1% | 38093  |
| <a href="#">[View Peptides]</a> | <a href="#">HSPD1</a>    | heat shock 60kDa protein 1 (chaperonin)                                            | 6  | 11 | 16.1% | 61055  |
| <a href="#">[View Peptides]</a> | <a href="#">PDIA4</a>    | protein disulfide isomerase family A, member 4                                     | 6  | 12 | 16.1% | 72933  |
| <a href="#">[View Peptides]</a> | <a href="#">TPD52L2</a>  | tumor protein D52-like 2                                                           | 2  | 2  | 16.0% | 22238  |
| <a href="#">[View Peptides]</a> | <a href="#">RPS3</a>     | ribosomal protein S3                                                               | 3  | 5  | 16.0% | 26688  |
| <a href="#">[View Peptides]</a> | <a href="#">HSPA4</a>    | heat shock 70kDa protein 4                                                         | 8  | 15 | 16.0% | 94300  |
| <a href="#">[View Peptides]</a> | <a href="#">TOP2A</a>    | topoisomerase (DNA) II alpha 170kDa                                                | 17 | 34 | 15.9% | 174384 |
| <a href="#">[View Peptides]</a> | <a href="#">EWSR1</a>    | Ewing sarcoma breakpoint region 1                                                  | 14 | 48 | 15.9% | 68478  |
| <a href="#">[View Peptides]</a> | <a href="#">SFRS3</a>    | splicing factor, arginine/serine-rich 3                                            | 3  | 17 | 15.9% | 19330  |
| <a href="#">[View Peptides]</a> | <a href="#">RBM39</a>    | RNA binding motif protein 39                                                       | 8  | 13 | 15.8% | 59380  |
| <a href="#">[View Peptides]</a> | <a href="#">TPT1</a>     | tumor protein, translationally-controlled 1                                        | 2  | 3  | 15.7% | 19595  |
| <a href="#">[View Peptides]</a> | <a href="#">APEX1</a>    | APEX nuclease (multifunctional DNA repair enzyme) 1                                | 4  | 5  | 15.7% | 35554  |
| <a href="#">[View Peptides]</a> | <a href="#">METAP2</a>   | methionyl aminopeptidase 2                                                         | 4  | 5  | 15.7% | 52892  |
| <a href="#">[View Peptides]</a> | <a href="#">MORC2</a>    | MORC family CW-type zinc finger 2                                                  | 11 | 16 | 15.7% | 110724 |
| <a href="#">[View Peptides]</a> | <a href="#">PRDX6</a>    | peroxiredoxin 6                                                                    | 2  | 4  | 15.6% | 25035  |
| <a href="#">[View Peptides]</a> | <a href="#">HIST1H1C</a> | histone cluster 1, H1c                                                             | 7  | 16 | 15.5% | 21365  |
| <a href="#">[View Peptides]</a> | <a href="#">BLVRB</a>    | biliverdin reductase B (flavin reductase (NADPH))                                  | 2  | 2  | 15.5% | 22119  |
| <a href="#">[View Peptides]</a> | <a href="#">RPL14</a>    | ribosomal protein L14                                                              | 3  | 7  | 15.5% | 23290  |
| <a href="#">[View Peptides]</a> | <a href="#">EIF6</a>     | eukaryotic translation initiation factor 6                                         | 3  | 6  | 15.5% | 26599  |
| <a href="#">[View Peptides]</a> | <a href="#">TIA1</a>     | TIA1 cytotoxic granule-associated RNA binding protein                              | 4  | 9  | 15.5% | 42961  |
| <a href="#">[View Peptides]</a> | <a href="#">ASCC3L1</a>  | activating signal cointegrator 1 complex subunit 3-like 1                          | 24 | 50 | 15.4% | 244505 |
| <a href="#">[View Peptides]</a> | <a href="#">DNAJC9</a>   | DnaJ (Hsp40) homolog, subfamily C, member 9                                        | 2  | 3  | 15.4% | 29910  |
| <a href="#">[View Peptides]</a> | <a href="#">HNRNPU</a>   | heterogeneous nuclear ribonucleoprotein U (scaffold attachment factor A)           | 11 | 18 | 15.3% | 90480  |
| <a href="#">[View Peptides]</a> | <a href="#">SERPINB1</a> | serpin peptidase inhibitor, clade B (ovalbumin), member 4                          | 1  | 9  | 15.3% | 42742  |

|                                 |                          |                                                                                                      |    |     |       |        |
|---------------------------------|--------------------------|------------------------------------------------------------------------------------------------------|----|-----|-------|--------|
| <a href="#">[View Peptides]</a> | <a href="#">PSMA4</a>    | proteasome (prosome, macropain) subunit, alpha type, 4                                               | 2  | 4   | 15.3% | 29484  |
| <a href="#">[View Peptides]</a> | <a href="#">SEC22B</a>   | SEC22 vesicle trafficking protein homolog B (S. cerevisiae)                                          | 2  | 2   | 15.3% | 24741  |
| <a href="#">[View Peptides]</a> | <a href="#">CNBP</a>     | CCHC-type zinc finger, nucleic acid binding protein                                                  | 2  | 4   | 15.3% | 19463  |
| <a href="#">[View Peptides]</a> | <a href="#">CKAP5</a>    | cytoskeleton associated protein 5                                                                    | 24 | 47  | 15.2% | 225507 |
| <a href="#">[View Peptides]</a> | <a href="#">NOL1</a>     | nucleolar protein 1, 120kDa                                                                          | 10 | 13  | 15.1% | 94078  |
| <a href="#">[View Peptides]</a> | <a href="#">HIST1H1E</a> | histone cluster 1, H1e                                                                               | 7  | 16  | 15.1% | 21865  |
| <a href="#">[View Peptides]</a> | <a href="#">ASS1</a>     | argininosuccinate synthetase 1                                                                       | 4  | 38  | 15.0% | 46530  |
| <a href="#">[View Peptides]</a> | <a href="#">SMS</a>      | spermine synthase                                                                                    | 3  | 4   | 15.0% | 41268  |
| <a href="#">[View Peptides]</a> | <a href="#">EXOSC5</a>   | exosome component 5                                                                                  | 2  | 3   | 14.9% | 25249  |
| <a href="#">[View Peptides]</a> | <a href="#">HNRPD</a>    | heterogeneous nuclear ribonucleoprotein D (AU-rich element RNA binding protein 1, 37kDa)             | 4  | 9   | 14.9% | 38434  |
| <a href="#">[View Peptides]</a> | <a href="#">KHDRBS1</a>  | KH domain containing, RNA binding, signal transduction associated 1                                  | 4  | 7   | 14.9% | 48227  |
| <a href="#">[View Peptides]</a> | <a href="#">SAFB</a>     | scaffold attachment factor B                                                                         | 12 | 20  | 14.9% | 102640 |
| <a href="#">[View Peptides]</a> | <a href="#">HIST1H1D</a> | histone cluster 1, H1d                                                                               | 7  | 16  | 14.9% | 22350  |
| <a href="#">[View Peptides]</a> | <a href="#">POLR2E</a>   | polymerase (RNA) II (DNA directed) polypeptide E, 25kDa                                              | 2  | 3   | 14.8% | 24611  |
| <a href="#">[View Peptides]</a> | <a href="#">PAICS</a>    | phosphoribosylaminoimidazole carboxylase, phosphoribosylaminoimidazole succinocarboxamide synthetase | 4  | 10  | 14.8% | 47079  |
| <a href="#">[View Peptides]</a> | <a href="#">FUS</a>      | fusion (involved in t(12;16) in malignant liposarcoma)                                               | 14 | 103 | 14.8% | 53426  |
| <a href="#">[View Peptides]</a> | <a href="#">HDAC2</a>    | histone deacetylase 2                                                                                | 4  | 7   | 14.8% | 55364  |
| <a href="#">[View Peptides]</a> | <a href="#">RPL15</a>    | ribosomal protein L15                                                                                | 4  | 7   | 14.7% | 24146  |
| <a href="#">[View Peptides]</a> | <a href="#">SNRPB2</a>   | small nuclear ribonucleoprotein polypeptide B''                                                      | 3  | 5   | 14.7% | 25486  |
| <a href="#">[View Peptides]</a> | <a href="#">BCAS2</a>    | breast carcinoma amplified sequence 2                                                                | 2  | 2   | 14.7% | 26131  |
| <a href="#">[View Peptides]</a> | <a href="#">ANXA4</a>    | annexin A4                                                                                           | 3  | 3   | 14.7% | 35883  |
| <a href="#">[View Peptides]</a> | <a href="#">PDIA3</a>    | protein disulfide isomerase family A, member 3                                                       | 6  | 9   | 14.7% | 56782  |
| <a href="#">[View Peptides]</a> | <a href="#">UBE1</a>     | ubiquitin-activating enzyme E1                                                                       | 11 | 22  | 14.7% | 117849 |
| <a href="#">[View Peptides]</a> | <a href="#">HSPA9</a>    | heat shock 70kDa protein 9 (mortalin)                                                                | 6  | 9   | 14.6% | 73681  |
| <a href="#">[View Peptides]</a> | <a href="#">MAPRE1</a>   | microtubule-associated protein, RP/EB family, member 1                                               | 2  | 2   | 14.6% | 29999  |
| <a href="#">[View Peptides]</a> | <a href="#">PSMB3</a>    | proteasome (prosome, macropain) subunit, beta type, 3                                                | 2  | 2   | 14.6% | 22949  |
| <a href="#">[View Peptides]</a> | <a href="#">RPL35A</a>   | ribosomal protein L35a                                                                               | 2  | 3   | 14.5% | 12538  |
| <a href="#">[View Peptides]</a> | <a href="#">RPL10</a>    | ribosomal protein L10                                                                                | 2  | 2   | 14.5% | 24577  |
| <a href="#">[View Peptides]</a> | <a href="#">TUBG2</a>    | tubulin, gamma 2                                                                                     | 4  | 7   | 14.4% | 51092  |
| <a href="#">[View Peptides]</a> | <a href="#">TUBG1</a>    | tubulin, gamma 1                                                                                     | 4  | 7   | 14.4% | 51170  |
| <a href="#">[View Peptides]</a> | <a href="#">KCNA2</a>    | potassium voltage-gated channel, shaker-related subfamily, beta member 2                             | 5  | 7   | 14.4% | 41000  |
| <a href="#">[View Peptides]</a> | <a href="#">HYOU1</a>    | hypoxia up-regulated 1                                                                               | 8  | 11  | 14.1% | 111335 |
| <a href="#">[View Peptides]</a> | <a href="#">SFRS5</a>    | splicing factor, arginine/serine-rich 5                                                              | 2  | 2   | 14.0% | 31264  |

|                                 |                          |                                                                                                         |    |    |       |        |
|---------------------------------|--------------------------|---------------------------------------------------------------------------------------------------------|----|----|-------|--------|
| <a href="#">[View Peptides]</a> | <a href="#">FBL</a>      | fibrillarin                                                                                             | 3  | 4  | 14.0% | 33784  |
| <a href="#">[View Peptides]</a> | <a href="#">SAFB2</a>    | scaffold attachment factor B2                                                                           | 11 | 18 | 14.0% | 107474 |
| <a href="#">[View Peptides]</a> | <a href="#">RPS14</a>    | ribosomal protein S14                                                                                   | 3  | 4  | 13.9% | 16273  |
| <a href="#">[View Peptides]</a> | <a href="#">RBMX</a>     | RNA binding motif protein, X-linked                                                                     | 4  | 11 | 13.8% | 42332  |
| <a href="#">[View Peptides]</a> | <a href="#">ATP5B</a>    | ATP synthase, H <sup>+</sup> transporting, mitochondrial F1 complex, beta polypeptide                   | 5  | 7  | 13.8% | 56560  |
| <a href="#">[View Peptides]</a> | <a href="#">GPI</a>      | glucose phosphate isomerase                                                                             | 6  | 16 | 13.8% | 63147  |
| <a href="#">[View Peptides]</a> | <a href="#">TFRC</a>     | transferrin receptor (p90, CD71)                                                                        | 7  | 7  | 13.7% | 84901  |
| <a href="#">[View Peptides]</a> | <a href="#">XRCC5</a>    | X-ray repair complementing defective repair in Chinese hamster cells 5 (double-strand-break rejoinin... | 6  | 19 | 13.7% | 82705  |
| <a href="#">[View Peptides]</a> | <a href="#">DBN1</a>     | drebrin 1                                                                                               | 5  | 12 | 13.7% | 71425  |
| <a href="#">[View Peptides]</a> | <a href="#">EBNA1BP2</a> | EBNA1 binding protein 2                                                                                 | 3  | 5  | 13.7% | 34820  |
| <a href="#">[View Peptides]</a> | <a href="#">SRM</a>      | spermidine synthase                                                                                     | 2  | 2  | 13.6% | 33825  |
| <a href="#">[View Peptides]</a> | <a href="#">NACA</a>     | nascent polypeptide-associated complex alpha subunit                                                    | 2  | 2  | 13.5% | 23384  |
| <a href="#">[View Peptides]</a> | <a href="#">API5</a>     | apoptosis inhibitor 5                                                                                   | 5  | 9  | 13.5% | 57561  |
| <a href="#">[View Peptides]</a> | <a href="#">ACLY</a>     | ATP citrate lyase                                                                                       | 11 | 15 | 13.5% | 120825 |
| <a href="#">[View Peptides]</a> | <a href="#">RPL24</a>    | ribosomal protein L24                                                                                   | 2  | 2  | 13.4% | 17779  |
| <a href="#">[View Peptides]</a> | <a href="#">TPM3</a>     | tropomyosin 3                                                                                           | 5  | 7  | 13.4% | 32819  |
| <a href="#">[View Peptides]</a> | <a href="#">RBBP4</a>    | retinoblastoma binding protein 4                                                                        | 5  | 7  | 13.4% | 47656  |
| <a href="#">[View Peptides]</a> | <a href="#">WARS</a>     | tryptophanyl-tRNA synthetase                                                                            | 4  | 4  | 13.4% | 53165  |
| <a href="#">[View Peptides]</a> | <a href="#">UGDH</a>     | UDP-glucose dehydrogenase                                                                               | 4  | 5  | 13.4% | 55024  |
| <a href="#">[View Peptides]</a> | <a href="#">EXOSC10</a>  | exosome component 10                                                                                    | 8  | 12 | 13.4% | 100831 |
| <a href="#">[View Peptides]</a> | <a href="#">RPS2</a>     | ribosomal protein S2                                                                                    | 3  | 4  | 13.3% | 31324  |
| <a href="#">[View Peptides]</a> | <a href="#">RPL8</a>     | ribosomal protein L8                                                                                    | 4  | 15 | 13.2% | 28025  |
| <a href="#">[View Peptides]</a> | <a href="#">ECHS1</a>    | enoyl Coenzyme A hydratase, short chain, 1, mitochondrial                                               | 2  | 4  | 13.1% | 31387  |
| <a href="#">[View Peptides]</a> | <a href="#">PRDX1</a>    | peroxiredoxin 1                                                                                         | 2  | 3  | 13.1% | 22110  |
| <a href="#">[View Peptides]</a> | <a href="#">EEF1G</a>    | eukaryotic translation elongation factor 1 gamma                                                        | 3  | 4  | 13.0% | 50119  |
| <a href="#">[View Peptides]</a> | <a href="#">RPS4X</a>    | ribosomal protein S4, X-linked                                                                          | 2  | 4  | 12.9% | 29598  |
| <a href="#">[View Peptides]</a> | <a href="#">ENO2</a>     | enolase 2 (gamma, neuronal)                                                                             | 3  | 11 | 12.9% | 47269  |
| <a href="#">[View Peptides]</a> | <a href="#">SET</a>      | SET translocation (myeloid leukemia-associated)                                                         | 3  | 9  | 12.8% | 33489  |
| <a href="#">[View Peptides]</a> | <a href="#">ILF2</a>     | interleukin enhancer binding factor 2, 45kDa                                                            | 3  | 4  | 12.8% | 43062  |
| <a href="#">[View Peptides]</a> | <a href="#">SNRP70</a>   | small nuclear ribonucleoprotein 70kDa polypeptide (RNP antigen)                                         | 5  | 8  | 12.8% | 51557  |
| <a href="#">[View Peptides]</a> | <a href="#">TCOF1</a>    | Treacher Collins-Franceschetti syndrome 1                                                               | 13 | 16 | 12.8% | 144312 |
| <a href="#">[View Peptides]</a> | <a href="#">POLR1A</a>   | polymerase (RNA) I polypeptide A, 194kDa                                                                | 13 | 25 | 12.8% | 194190 |
| <a href="#">[View Peptides]</a> | <a href="#">G3BP2</a>    | GTPase activating protein (SH3 domain) binding protein 2                                                | 3  | 8  | 12.7% | 54111  |
| <a href="#">[View Peptides]</a> | <a href="#">PSMD12</a>   | proteasome (prosome, macropain) 26S subunit, non-ATPase, 12                                             | 4  | 5  | 12.7% | 52904  |
| <a href="#">[View Peptides]</a> | <a href="#">HNRNPC</a>   | heterogeneous nuclear ribonucleoprotein C (C1/C2)                                                       | 3  | 5  | 12.7% | 33688  |

|                                 |                                     |                                                                                                         |    |    |       |        |
|---------------------------------|-------------------------------------|---------------------------------------------------------------------------------------------------------|----|----|-------|--------|
| <a href="#">[View Peptides]</a> | <a href="#">GPR137, CAPRIN1</a>     | cell cycle associated protein 1, G protein-coupled receptor 137                                         | 8  | 14 | 12.6% | 72752  |
| <a href="#">[View Peptides]</a> | <a href="#">PRPF40A</a>             | PRP40 pre-mRNA processing factor 40 homolog A (S. cerevisiae)                                           | 8  | 12 | 12.6% | 108805 |
| <a href="#">[View Peptides]</a> | <a href="#">RPL27</a>               | ribosomal protein L27                                                                                   | 3  | 5  | 12.5% | 15798  |
| <a href="#">[View Peptides]</a> | <a href="#">SNRPB</a>               | small nuclear ribonucleoprotein polypeptides B and B1                                                   | 4  | 15 | 12.5% | 24610  |
| <a href="#">[View Peptides]</a> | <a href="#">SNRPN, SNURF</a>        | SNRPN upstream reading frame, small nuclear ribonucleoprotein polypeptide N                             | 4  | 15 | 12.5% | 24614  |
| <a href="#">[View Peptides]</a> | <a href="#">TPM4</a>                | tropomyosin 4                                                                                           | 4  | 9  | 12.5% | 28522  |
| <a href="#">[View Peptides]</a> | <a href="#">gi 550013, gi 10...</a> | gi 550013 gb AAA85654.1  ribosomal protein L5, pir  S55912 ribosomal protein L5, cytosolic - human ,... | 3  | 3  | 12.5% | 34448  |
| <a href="#">[View Peptides]</a> | <a href="#">TOP1</a>                | topoisomerase (DNA) I                                                                                   | 9  | 18 | 12.5% | 90726  |
| <a href="#">[View Peptides]</a> | <a href="#">PRPF8</a>               | PRP8 pre-mRNA processing factor 8 homolog (S. cerevisiae)                                               | 20 | 42 | 12.5% | 273599 |
| <a href="#">[View Peptides]</a> | <a href="#">PSMB2</a>               | proteasome (prosome, macropain) subunit, beta type, 2                                                   | 2  | 3  | 12.4% | 22836  |
| <a href="#">[View Peptides]</a> | <a href="#">C1QBP</a>               | complement component 1, q subcomponent binding protein                                                  | 2  | 5  | 12.4% | 31362  |
| <a href="#">[View Peptides]</a> | <a href="#">gi 1256837, gi 1...</a> | gi 9558733 ref NP_037425.1  transformer-2 alpha [Homo sapiens], gi 4033480 sp Q13595 TRA2A_HUMAN Tra... | 2  | 8  | 12.4% | 32689  |
| <a href="#">[View Peptides]</a> | <a href="#">AKR1C4</a>              | aldo-keto reductase family 1, member C4 (chlordecone reductase; 3-alpha hydroxysteroid dehydrogenase... | 3  | 8  | 12.4% | 37095  |
| <a href="#">[View Peptides]</a> | <a href="#">KRT2</a>                | keratin 2 (epidermal ichthyosis bullosa of Siemens)                                                     | 8  | 12 | 12.4% | 65865  |
| <a href="#">[View Peptides]</a> | <a href="#">GNB2L1</a>              | guanine nucleotide binding protein (G protein), beta polypeptide 2-like 1                               | 3  | 4  | 12.3% | 35077  |
| <a href="#">[View Peptides]</a> | <a href="#">LSM14A</a>              | LSM14A, SCD6 homolog A (S. cerevisiae)                                                                  | 5  | 10 | 12.3% | 50530  |
| <a href="#">[View Peptides]</a> | <a href="#">POLR1E</a>              | polymerase (RNA) I polypeptide E, 53kDa                                                                 | 4  | 5  | 12.3% | 53962  |
| <a href="#">[View Peptides]</a> | <a href="#">SF3B3</a>               | splicing factor 3b, subunit 3, 130kDa                                                                   | 11 | 24 | 12.3% | 135592 |
| <a href="#">[View Peptides]</a> | <a href="#">gi 107222, gi 48...</a> | ref NP_005372.1  nucleolin [Homo sapiens] , gi 189306 gb AAA59954.1  nucleolin, gi 128841 sp P19338 ... | 8  | 15 | 12.2% | 76344  |
| <a href="#">[View Peptides]</a> | <a href="#">PSMA3</a>               | proteasome (prosome, macropain) subunit, alpha type, 3                                                  | 3  | 3  | 12.2% | 28433  |
| <a href="#">[View Peptides]</a> | <a href="#">NP</a>                  | nucleoside phosphorylase                                                                                | 2  | 3  | 12.1% | 32148  |
| <a href="#">[View Peptides]</a> | <a href="#">RFC3</a>                | replication factor C (activator 1) 3, 38kDa                                                             | 3  | 4  | 12.1% | 40556  |
| <a href="#">[View Peptides]</a> | <a href="#">OLA1</a>                | Obg-like ATPase 1                                                                                       | 3  | 3  | 12.1% | 44744  |
| <a href="#">[View Peptides]</a> | <a href="#">gi 35909, gi 471...</a> | gi 56206088 emb CAI22287.1  regulator of chromosome condensation 1 [Homo sapiens], gi 47115323 emb C... | 3  | 6  | 12.1% | 44969  |
| <a href="#">[View Peptides]</a> | <a href="#">GDI2</a>                | GDP dissociation inhibitor 2                                                                            | 4  | 4  | 12.1% | 50663  |
| <a href="#">[View Peptides]</a> | <a href="#">CPS1</a>                | carbamoyl-phosphate synthetase 1, mitochondrial                                                         | 13 | 16 | 12.1% | 164939 |
| <a href="#">[View Peptides]</a> | <a href="#">PAK1IP1</a>             | PAK1 interacting protein 1                                                                              | 3  | 4  | 12.0% | 43964  |
| <a href="#">[View Peptides]</a> | <a href="#">NAP1L4</a>              | nucleosome assembly protein 1-like 4                                                                    | 2  | 3  | 12.0% | 42823  |

|                                 |                             |                                                                                                     |    |    |       |        |
|---------------------------------|-----------------------------|-----------------------------------------------------------------------------------------------------|----|----|-------|--------|
| <a href="#">[View Peptides]</a> | <a href="#">YWHAQ</a>       | tyrosine 3-monooxygenase/tryptophan 5-monooxygenase activation protein, theta polypeptide           | 3  | 6  | 11.8% | 27764  |
| <a href="#">[View Peptides]</a> | <a href="#">DAZAP1</a>      | DAZ associated protein 1                                                                            | 3  | 5  | 11.8% | 43383  |
| <a href="#">[View Peptides]</a> | <a href="#">CCT5</a>        | chaperonin containing TCP1, subunit 5 (epsilon)                                                     | 5  | 8  | 11.8% | 59671  |
| <a href="#">[View Peptides]</a> | <a href="#">TMPO</a>        | thymopoietin                                                                                        | 4  | 9  | 11.8% | 75492  |
| <a href="#">[View Peptides]</a> | <a href="#">GMPS</a>        | guanine monphosphate synthetase                                                                     | 5  | 7  | 11.7% | 76715  |
| <a href="#">[View Peptides]</a> | <a href="#">YWHAG</a>       | tyrosine 3-monooxygenase/tryptophan 5-monooxygenase activation protein, gamma polypeptide           | 3  | 7  | 11.7% | 28303  |
| <a href="#">[View Peptides]</a> | <a href="#">ANP32B</a>      | acidic (leucine-rich) nuclear phosphoprotein 32 family, member B                                    | 2  | 6  | 11.6% | 28788  |
| <a href="#">[View Peptides]</a> | <a href="#">ANP32A</a>      | acidic (leucine-rich) nuclear phosphoprotein 32 family, member A                                    | 2  | 6  | 11.6% | 28585  |
| <a href="#">[View Peptides]</a> | <a href="#">POLR2C</a>      | polymerase (RNA) II (DNA directed) polypeptide C, 33kDa                                             | 2  | 2  | 11.6% | 31441  |
| <a href="#">[View Peptides]</a> | <a href="#">SF3B2</a>       | splicing factor 3b, subunit 2, 145kDa                                                               | 6  | 8  | 11.6% | 97657  |
| <a href="#">[View Peptides]</a> | <a href="#">KIF23</a>       | kinesin family member 23                                                                            | 6  | 7  | 11.6% | 98105  |
| <a href="#">[View Peptides]</a> | <a href="#">CAND1</a>       | cullin-associated and neddylation-dissociated 1                                                     | 9  | 11 | 11.5% | 136375 |
| <a href="#">[View Peptides]</a> | <a href="#">MYH9</a>        | myosin, heavy chain 9, non-muscle                                                                   | 13 | 20 | 11.4% | 226530 |
| <a href="#">[View Peptides]</a> | <a href="#">RCN1</a>        | reticulocalbin 1, EF-hand calcium binding domain                                                    | 2  | 3  | 11.2% | 38890  |
| <a href="#">[View Peptides]</a> | <a href="#">HLA-A</a>       | major histocompatibility complex, class I, A                                                        | 3  | 3  | 11.2% | 40909  |
| <a href="#">[View Peptides]</a> | <a href="#">PWP2</a>        | PWP2 periodic tryptophan protein homolog (yeast)                                                    | 7  | 13 | 11.2% | 102451 |
| <a href="#">[View Peptides]</a> | <a href="#">UBAP2L</a>      | ubiquitin associated protein 2-like                                                                 | 7  | 7  | 11.2% | 103930 |
| <a href="#">[View Peptides]</a> | <a href="#">YBX1</a>        | Y box binding protein 1                                                                             | 2  | 2  | 11.1% | 35924  |
| <a href="#">[View Peptides]</a> | <a href="#">RPL6</a>        | ribosomal protein L6                                                                                | 3  | 6  | 11.1% | 32728  |
| <a href="#">[View Peptides]</a> | <a href="#">DNAJC8</a>      | DnaJ (Hsp40) homolog, subfamily C, member 8                                                         | 2  | 2  | 11.1% | 29842  |
| <a href="#">[View Peptides]</a> | <a href="#">GTF2H3</a>      | general transcription factor IIH, polypeptide 3, 34kDa                                              | 2  | 2  | 11.0% | 34378  |
| <a href="#">[View Peptides]</a> | <a href="#">THOC1</a>       | THO complex 1                                                                                       | 5  | 9  | 11.0% | 75666  |
| <a href="#">[View Peptides]</a> | <a href="#">HSPA1L</a>      | heat shock 70kDa protein 1-like                                                                     | 6  | 8  | 10.9% | 70375  |
| <a href="#">[View Peptides]</a> | <a href="#">CCT6B</a>       | chaperonin containing TCP1, subunit 6B (zeta 2)                                                     | 3  | 5  | 10.9% | 57765  |
| <a href="#">[View Peptides]</a> | <a href="#">SFRS2</a>       | splicing factor, arginine/serine-rich 2                                                             | 2  | 3  | 10.9% | 25476  |
| <a href="#">[View Peptides]</a> | <a href="#">CDC2</a>        | cell division cycle 2, G1 to S and G2 to M                                                          | 2  | 3  | 10.8% | 34095  |
| <a href="#">[View Peptides]</a> | <a href="#">AKR1C3</a>      | aldo-keto reductase family 1, member C3 (3-alpha hydroxysteroid dehydrogenase, type II)             | 2  | 6  | 10.8% | 36844  |
| <a href="#">[View Peptides]</a> | <a href="#">THOC3</a>       | THO complex 3                                                                                       | 3  | 3  | 10.8% | 38772  |
| <a href="#">[View Peptides]</a> | <a href="#">MAPK1</a>       | mitogen-activated protein kinase 1                                                                  | 2  | 2  | 10.8% | 41390  |
| <a href="#">[View Peptides]</a> | <a href="#">SRP68</a>       | signal recognition particle 68kDa                                                                   | 4  | 6  | 10.7% | 70730  |
| <a href="#">[View Peptides]</a> | <a href="#">PSMC3</a>       | proteasome (prosome, macropain) 26S subunit, ATPase, 3                                              | 3  | 5  | 10.7% | 49204  |
| <a href="#">[View Peptides]</a> | <a href="#">SORB</a>        | sorbitol dehydrogenase                                                                              | 2  | 2  | 10.6% | 38297  |
| <a href="#">[View Peptides]</a> | <a href="#">PSD4, PSMD4</a> | proteasome (prosome, macropain) 26S subunit, non-ATPase, 4, pleckstrin and Sec7 domain containing 4 | 2  | 2  | 10.6% | 40737  |

|                                 |                            |                                                                                                          |    |    |       |        |
|---------------------------------|----------------------------|----------------------------------------------------------------------------------------------------------|----|----|-------|--------|
| <a href="#">[View Peptides]</a> | <a href="#">HNRPF</a>      | heterogeneous nuclear ribonucleoprotein F                                                                | 4  | 93 | 10.6% | 45672  |
| <a href="#">[View Peptides]</a> | <a href="#">EIF4A2</a>     | eukaryotic translation initiation factor 4A, isoform 2                                                   | 4  | 6  | 10.6% | 46402  |
| <a href="#">[View Peptides]</a> | <a href="#">PGD</a>        | phosphogluconate dehydrogenase                                                                           | 3  | 6  | 10.6% | 53140  |
| <a href="#">[View Peptides]</a> | <a href="#">RPA1</a>       | replication protein A1, 70kDa                                                                            | 4  | 5  | 10.6% | 68138  |
| <a href="#">[View Peptides]</a> | <a href="#">PABPN1</a>     | poly(A) binding protein, nuclear 1                                                                       | 2  | 5  | 10.5% | 32749  |
| <a href="#">[View Peptides]</a> | <a href="#">SFRS6</a>      | splicing factor, arginine/serine-rich 6                                                                  | 3  | 4  | 10.5% | 39587  |
| <a href="#">[View Peptides]</a> | <a href="#">RDX</a>        | radixin                                                                                                  | 8  | 13 | 10.5% | 68564  |
| <a href="#">[View Peptides]</a> | <a href="#">SF3B1</a>      | splicing factor 3b, subunit 1, 155kDa                                                                    | 7  | 18 | 10.4% | 145815 |
| <a href="#">[View Peptides]</a> | <a href="#">VIL1</a>       | villin 1                                                                                                 | 6  | 7  | 10.4% | 92695  |
| <a href="#">[View Peptides]</a> | <a href="#">gi 2506774</a> | gi 2506774 sp P05787 K2C8_HUMAN Keratin, type II cytoskeletal 8 (Cytokeratin-8) (CK-8) (Keraton-8) (...) | 4  | 5  | 10.4% | 53674  |
| <a href="#">[View Peptides]</a> | <a href="#">EXOSC9</a>     | exosome component 9                                                                                      | 3  | 4  | 10.4% | 46978  |
| <a href="#">[View Peptides]</a> | <a href="#">PLRG1</a>      | pleiotropic regulator 1 (PRL1 homolog, Arabidopsis)                                                      | 4  | 6  | 10.3% | 57194  |
| <a href="#">[View Peptides]</a> | <a href="#">TOP2B</a>      | topoisomerase (DNA) II beta 180kDa                                                                       | 12 | 15 | 10.3% | 183266 |
| <a href="#">[View Peptides]</a> | <a href="#">KIF2C</a>      | kinesin family member 2C                                                                                 | 4  | 4  | 10.2% | 81313  |
| <a href="#">[View Peptides]</a> | <a href="#">PPP2R1A</a>    | protein phosphatase 2 (formerly 2A), regulatory subunit A, alpha isoform                                 | 4  | 5  | 10.2% | 65224  |
| <a href="#">[View Peptides]</a> | <a href="#">C20orf4</a>    | chromosome 20 open reading frame 4                                                                       | 2  | 2  | 10.2% | 43472  |
| <a href="#">[View Peptides]</a> | <a href="#">PSMB7</a>      | proteasome (prosome, macropain) subunit, beta type, 7                                                    | 2  | 5  | 10.1% | 29965  |
| <a href="#">[View Peptides]</a> | <a href="#">CDC37</a>      | cell division cycle 37 homolog (S. cerevisiae)                                                           | 2  | 3  | 10.1% | 44468  |
| <a href="#">[View Peptides]</a> | <a href="#">IFI16</a>      | interferon, gamma-inducible protein 16                                                                   | 5  | 9  | 10.1% | 88275  |
| <a href="#">[View Peptides]</a> | <a href="#">DDX23</a>      | DEAD (Asp-Glu-Ala-Asp) box polypeptide 23                                                                | 6  | 9  | 10.1% | 95647  |
| <a href="#">[View Peptides]</a> | <a href="#">MBD3</a>       | methyl-CpG binding domain protein 3                                                                      | 2  | 3  | 10.0% | 32844  |
| <a href="#">[View Peptides]</a> | <a href="#">ARPC2</a>      | actin related protein 2/3 complex, subunit 2, 34kDa                                                      | 3  | 3  | 10.0% | 34333  |
| <a href="#">[View Peptides]</a> | <a href="#">ACTR3</a>      | ARP3 actin-related protein 3 homolog (yeast)                                                             | 2  | 6  | 10.0% | 47371  |
| <a href="#">[View Peptides]</a> | <a href="#">KRT5</a>       | keratin 5 (epidermolysis bullosa simplex, Dowling-Meara/Kobner/Weber-Cockayne types)                     | 6  | 8  | 10.0% | 62447  |
| <a href="#">[View Peptides]</a> | <a href="#">NAT10</a>      | N-acetyltransferase 10                                                                                   | 6  | 6  | 10.0% | 115704 |
| <a href="#">[View Peptides]</a> | <a href="#">SMARCD1</a>    | SWI/SNF related, matrix associated, actin dependent regulator of chromatin, subfamily d, member 1        | 3  | 5  | 9.9%  | 54945  |
| <a href="#">[View Peptides]</a> | <a href="#">RPL3</a>       | ribosomal protein L3                                                                                     | 2  | 5  | 9.9%  | 46109  |
| <a href="#">[View Peptides]</a> | <a href="#">RRS1</a>       | RRS1 ribosome biogenesis regulator homolog (S. cerevisiae)                                               | 2  | 2  | 9.9%  | 41193  |
| <a href="#">[View Peptides]</a> | <a href="#">POLB</a>       | polymerase (DNA directed), beta                                                                          | 2  | 3  | 9.9%  | 38178  |
| <a href="#">[View Peptides]</a> | <a href="#">SNRPA</a>      | small nuclear ribonucleoprotein polypeptide A                                                            | 3  | 4  | 9.9%  | 31280  |
| <a href="#">[View Peptides]</a> | <a href="#">SEPT5</a>      | septin 5                                                                                                 | 2  | 6  | 9.8%  | 42777  |
| <a href="#">[View Peptides]</a> | <a href="#">EIF4B</a>      | eukaryotic translation initiation factor 4B                                                              | 3  | 8  | 9.8%  | 69224  |
| <a href="#">[View Peptides]</a> | <a href="#">LIG3</a>       | ligase III, DNA, ATP-dependent                                                                           | 8  | 9  | 9.8%  | 102691 |
| <a href="#">[View Peptides]</a> | <a href="#">SPTBN2</a>     | spectrin, beta, non-erythrocytic 2                                                                       | 14 | 18 | 9.7%  | 271293 |
| <a href="#">[View Peptides]</a> | <a href="#">DDX3X</a>      | DEAD (Asp-Glu-Ala-Asp) box polypeptide 3, X-linked                                                       | 5  | 10 | 9.7%  | 73244  |

|                                 |                                     |                                                                                                         |   |    |      |        |
|---------------------------------|-------------------------------------|---------------------------------------------------------------------------------------------------------|---|----|------|--------|
| <a href="#">[View Peptides]</a> | <a href="#">PPP2R1B</a>             | protein phosphatase 2 (formerly 2A), regulatory subunit 4 A, beta isoform                               | 4 | 4  | 9.7% | 66202  |
| <a href="#">[View Peptides]</a> | <a href="#">CBR1</a>                | carbonyl reductase 1                                                                                    | 2 | 2  | 9.7% | 30375  |
| <a href="#">[View Peptides]</a> | <a href="#">PRDX4</a>               | peroxiredoxin 4                                                                                         | 2 | 3  | 9.6% | 30540  |
| <a href="#">[View Peptides]</a> | <a href="#">TYMS</a>                | thymidylate synthetase                                                                                  | 2 | 2  | 9.6% | 35716  |
| <a href="#">[View Peptides]</a> | <a href="#">DEK</a>                 | DEK oncogene (DNA binding)                                                                              | 3 | 3  | 9.6% | 42674  |
| <a href="#">[View Peptides]</a> | <a href="#">TXNRD1</a>              | thioredoxin reductase 1                                                                                 | 3 | 3  | 9.6% | 54707  |
| <a href="#">[View Peptides]</a> | <a href="#">KPNA4</a>               | karyopherin alpha 4 (importin alpha 3)                                                                  | 2 | 2  | 9.6% | 57887  |
| <a href="#">[View Peptides]</a> | <a href="#">MTA2</a>                | metastasis associated 1 family, member 2                                                                | 4 | 5  | 9.6% | 75023  |
| <a href="#">[View Peptides]</a> | <a href="#">RFC1</a>                | replication factor C (activator 1) 1, 145kDa                                                            | 7 | 8  | 9.6% | 128254 |
| <a href="#">[View Peptides]</a> | <a href="#">RPS3A</a>               | ribosomal protein S3A                                                                                   | 2 | 8  | 9.5% | 29945  |
| <a href="#">[View Peptides]</a> | <a href="#">GALNT2</a>              | UDP-N-acetyl-alpha-D-galactosamine: polypeptide N-acetylgalactosaminyltransferase 2 (GalNAc-T2)         | 3 | 3  | 9.5% | 64733  |
| <a href="#">[View Peptides]</a> | <a href="#">HSPA4L</a>              | heat shock 70kDa protein 4-like                                                                         | 5 | 6  | 9.5% | 94486  |
| <a href="#">[View Peptides]</a> | <a href="#">GOT1</a>                | glutamic-oxaloacetic transaminase 1, soluble (aspartate aminotransferase 1)                             | 2 | 4  | 9.4% | 46248  |
| <a href="#">[View Peptides]</a> | <a href="#">SMARCB1</a>             | SWI/SNF related, matrix associated, actin dependent regulator of chromatin, subfamily b, member 1       | 2 | 2  | 9.4% | 44141  |
| <a href="#">[View Peptides]</a> | <a href="#">APTX</a>                | aprataxin                                                                                               | 2 | 3  | 9.3% | 40740  |
| <a href="#">[View Peptides]</a> | <a href="#">NLE1</a>                | notchless homolog 1 (Drosophila)                                                                        | 3 | 4  | 9.3% | 53266  |
| <a href="#">[View Peptides]</a> | <a href="#">FSCN1</a>               | fascin homolog 1, actin-bundling protein (Strongylocentrotus purpuratus)                                | 3 | 13 | 9.3% | 54530  |
| <a href="#">[View Peptides]</a> | <a href="#">SNW1</a>                | SNW domain containing 1                                                                                 | 3 | 3  | 9.3% | 61495  |
| <a href="#">[View Peptides]</a> | <a href="#">DDX52</a>               | DEAD (Asp-Glu-Ala-Asp) box polypeptide 52                                                               | 3 | 4  | 9.3% | 67466  |
| <a href="#">[View Peptides]</a> | <a href="#">COPG</a>                | coatomer protein complex, subunit gamma                                                                 | 5 | 5  | 9.3% | 97718  |
| <a href="#">[View Peptides]</a> | <a href="#">SKIV2L2</a>             | superkiller viralicidic activity 2-like 2 (S. cerevisiae)                                               | 7 | 12 | 9.3% | 117805 |
| <a href="#">[View Peptides]</a> | <a href="#">NOLA1</a>               | nucleolar protein family A, member 1 (H/ACA small nucleolar RNPs)                                       | 2 | 2  | 9.2% | 22348  |
| <a href="#">[View Peptides]</a> | <a href="#">CAPG</a>                | capping protein (actin filament), gelsolin-like                                                         | 2 | 2  | 9.2% | 38518  |
| <a href="#">[View Peptides]</a> | <a href="#">HNRPLL</a>              | heterogeneous nuclear ribonucleoprotein L-like                                                          | 3 | 3  | 9.2% | 60083  |
| <a href="#">[View Peptides]</a> | <a href="#">DDB1</a>                | damage-specific DNA binding protein 1, 127kDa                                                           | 7 | 12 | 9.2% | 126968 |
| <a href="#">[View Peptides]</a> | <a href="#">KPNB1</a>               | karyopherin (importin) beta 1                                                                           | 5 | 11 | 9.1% | 97170  |
| <a href="#">[View Peptides]</a> | <a href="#">ANXA6</a>               | annexin A6                                                                                              | 4 | 5  | 9.1% | 75873  |
| <a href="#">[View Peptides]</a> | <a href="#">gi 399184, qi 63...</a> | gi 63102451 gb AAH95440.1  CAP1 protein [Homo sapiens], gi 5453595 ref NP_006358.1  adenylyl cyclase... | 2 | 3  | 9.1% | 51673  |
| <a href="#">[View Peptides]</a> | <a href="#">CTH</a>                 | cystathionase (cystathionine gamma-lyase)                                                               | 2 | 3  | 9.1% | 44508  |
| <a href="#">[View Peptides]</a> | <a href="#">TAF15</a>               | TAF15 RNA polymerase II, TATA box binding protein (TBP)-associated factor, 68kDa                        | 4 | 14 | 9.0% | 61830  |
| <a href="#">[View Peptides]</a> | <a href="#">CTTN</a>                | cortactin                                                                                               | 3 | 4  | 8.9% | 61636  |
| <a href="#">[View Peptides]</a> | <a href="#">PSMC4</a>               | proteasome (prosome, macropain) 26S subunit, ATPase, 4                                                  | 4 | 4  | 8.9% | 47366  |



|                                 |                                     |                                                                                                         |    |    |      |        |
|---------------------------------|-------------------------------------|---------------------------------------------------------------------------------------------------------|----|----|------|--------|
| <a href="#">[View Peptides]</a> | <a href="#">gi 3334339, gi 1...</a> | gi 3334339 sp Q92747 ARC1A_HUMAN Actin-related protein 2/3 complex subunit 1A (SOP2-like protein), g... | 2  | 2  | 8.9% | 41583  |
| <a href="#">[View Peptides]</a> | <a href="#">CHD4</a>                | chromodomain helicase DNA binding protein 4                                                             | 11 | 15 | 8.8% | 217989 |
| <a href="#">[View Peptides]</a> | <a href="#">CD2BP2</a>              | CD2 (cytoplasmic tail) binding protein 2                                                                | 2  | 2  | 8.8% | 37646  |
| <a href="#">[View Peptides]</a> | <a href="#">MDH1</a>                | malate dehydrogenase 1, NAD (soluble)                                                                   | 2  | 3  | 8.7% | 36426  |
| <a href="#">[View Peptides]</a> | <a href="#">TWF1</a>                | twinfilin, actin-binding protein, homolog 1 (Drosophila)                                                | 2  | 2  | 8.7% | 42209  |
| <a href="#">[View Peptides]</a> | <a href="#">ARHGAP1</a>             | Rho GTPase activating protein 1                                                                         | 2  | 2  | 8.7% | 50436  |
| <a href="#">[View Peptides]</a> | <a href="#">EXOSC4</a>              | exosome component 4                                                                                     | 2  | 2  | 8.6% | 26383  |
| <a href="#">[View Peptides]</a> | <a href="#">HSPH1</a>               | heat shock 105kDa/110kDa protein 1                                                                      | 4  | 5  | 8.5% | 96865  |
| <a href="#">[View Peptides]</a> | <a href="#">LTA4H</a>               | leukotriene A4 hydrolase                                                                                | 3  | 3  | 8.5% | 69285  |
| <a href="#">[View Peptides]</a> | <a href="#">ERCC2</a>               | excision repair cross-complementing rodent repair deficiency, complementation group 2 (xeroderma pig... | 4  | 4  | 8.4% | 86909  |
| <a href="#">[View Peptides]</a> | <a href="#">SMC3</a>                | structural maintenance of chromosomes 3                                                                 | 6  | 9  | 8.4% | 141541 |
| <a href="#">[View Peptides]</a> | <a href="#">DNMT1</a>               | DNA (cytosine-5-)-methyltransferase 1                                                                   | 8  | 13 | 8.4% | 183164 |
| <a href="#">[View Peptides]</a> | <a href="#">GRSF1</a>               | G-rich RNA sequence binding factor 1                                                                    | 2  | 4  | 8.3% | 50170  |
| <a href="#">[View Peptides]</a> | <a href="#">EIF3B</a>               | eukaryotic translation initiation factor 3, subunit B                                                   | 4  | 5  | 8.2% | 92492  |
| <a href="#">[View Peptides]</a> | <a href="#">ERCC3</a>               | excision repair cross-complementing rodent repair deficiency, complementation group 3 (xeroderma pig... | 4  | 5  | 8.2% | 89278  |
| <a href="#">[View Peptides]</a> | <a href="#">CIRH1A</a>              | cirrhosis, autosomal recessive 1A (cirhin)                                                              | 3  | 7  | 8.2% | 76890  |
| <a href="#">[View Peptides]</a> | <a href="#">PSMC1</a>               | proteasome (prosome, macropain) 26S subunit, ATPase, 1                                                  | 2  | 2  | 8.2% | 49185  |
| <a href="#">[View Peptides]</a> | <a href="#">SERPINB6</a>            | serpin peptidase inhibitor, clade B (ovalbumin), member 6                                               | 2  | 2  | 8.2% | 42590  |
| <a href="#">[View Peptides]</a> | <a href="#">FDPS</a>                | farnesyl diphosphate synthase (farnesyl pyrophosphate synthetase, dimethylallyltranstransferase, ger... | 2  | 3  | 8.2% | 40532  |
| <a href="#">[View Peptides]</a> | <a href="#">COPS4</a>               | COP9 constitutive photomorphogenic homolog subunit 4 (Arabidopsis)                                      | 2  | 2  | 8.1% | 46269  |
| <a href="#">[View Peptides]</a> | <a href="#">SEPT8</a>               | septin 8                                                                                                | 3  | 7  | 8.1% | 55756  |
| <a href="#">[View Peptides]</a> | <a href="#">RANBP5</a>              | RAN binding protein 5                                                                                   | 5  | 7  | 8.1% | 123630 |
| <a href="#">[View Peptides]</a> | <a href="#">MYH10</a>               | myosin, heavy chain 10, non-muscle                                                                      | 9  | 18 | 8.0% | 228937 |
| <a href="#">[View Peptides]</a> | <a href="#">ABCE1</a>               | ATP-binding cassette, sub-family E (OABP), member 1                                                     | 3  | 3  | 8.0% | 67314  |
| <a href="#">[View Peptides]</a> | <a href="#">NOLC1</a>               | nucleolar and coiled-body phosphoprotein 1                                                              | 4  | 6  | 7.9% | 73720  |
| <a href="#">[View Peptides]</a> | <a href="#">AURKA</a>               | aurora kinase A                                                                                         | 2  | 2  | 7.9% | 45809  |
| <a href="#">[View Peptides]</a> | <a href="#">PRSS3</a>               | protease, serine, 3 (mesotrypsin)                                                                       | 2  | 3  | 7.9% | 32499  |
| <a href="#">[View Peptides]</a> | <a href="#">RPL13A</a>              | ribosomal protein L13a                                                                                  | 2  | 4  | 7.9% | 23577  |
| <a href="#">[View Peptides]</a> | <a href="#">BCKDK</a>               | branched chain ketoacid dehydrogenase kinase                                                            | 2  | 5  | 7.8% | 46360  |
| <a href="#">[View Peptides]</a> | <a href="#">GANAB</a>               | glucosidase, alpha; neutral AB                                                                          | 5  | 5  | 7.7% | 106874 |
| <a href="#">[View Peptides]</a> | <a href="#">LMNA</a>                | lamin A/C                                                                                               | 4  | 6  | 7.7% | 74140  |
| <a href="#">[View Peptides]</a> | <a href="#">STRAP</a>               | serine/threonine kinase receptor associated protein                                                     | 2  | 3  | 7.7% | 38438  |
| <a href="#">[View Peptides]</a> | <a href="#">VAT1</a>                | vesicle amine transport protein 1 homolog (T. californica)                                              | 2  | 2  | 7.6% | 41920  |
| <a href="#">[View Peptides]</a> | <a href="#">RDBP</a>                | RD RNA binding protein                                                                                  | 2  | 2  | 7.6% | 43240  |

|                                 |                             |                                                                                                     |    |    |      |        |
|---------------------------------|-----------------------------|-----------------------------------------------------------------------------------------------------|----|----|------|--------|
| <a href="#">[View Peptides]</a> | <a href="#">MAT2A</a>       | methionine adenosyltransferase II, alpha                                                            | 2  | 3  | 7.6% | 43661  |
| <a href="#">[View Peptides]</a> | <a href="#">RSL1D1</a>      | ribosomal L1 domain containing 1                                                                    | 3  | 3  | 7.6% | 54973  |
| <a href="#">[View Peptides]</a> | <a href="#">ACSL4</a>       | acyl-CoA synthetase long-chain family member 4                                                      | 3  | 3  | 7.6% | 79188  |
| <a href="#">[View Peptides]</a> | <a href="#">MYBBP1A</a>     | MYB binding protein (P160) 1a                                                                       | 5  | 8  | 7.6% | 148854 |
| <a href="#">[View Peptides]</a> | <a href="#">CPSF1</a>       | cleavage and polyadenylation specific factor 1, 160kDa                                              | 4  | 5  | 7.6% | 160883 |
| <a href="#">[View Peptides]</a> | <a href="#">FASN</a>        | fatty acid synthase                                                                                 | 12 | 28 | 7.6% | 273397 |
| <a href="#">[View Peptides]</a> | <a href="#">PSMC6</a>       | proteasome (prosome, macropain) 26S subunit, ATPase, 6                                              | 2  | 2  | 7.5% | 44173  |
| <a href="#">[View Peptides]</a> | <a href="#">SHMT2</a>       | serine hydroxymethyltransferase 2 (mitochondrial)                                                   | 2  | 5  | 7.5% | 55993  |
| <a href="#">[View Peptides]</a> | <a href="#">HSPA6</a>       | heat shock 70kDa protein 6 (HSP70B')                                                                | 4  | 6  | 7.5% | 71028  |
| <a href="#">[View Peptides]</a> | <a href="#">ILF3</a>        | interleukin enhancer binding factor 3, 90kDa                                                        | 4  | 6  | 7.5% | 95339  |
| <a href="#">[View Peptides]</a> | <a href="#">CTNNA1</a>      | catenin (cadherin-associated protein), alpha 1, 102kDa                                              | 4  | 7  | 7.5% | 100071 |
| <a href="#">[View Peptides]</a> | <a href="#">TUBGCP2</a>     | tubulin, gamma complex associated protein 2                                                         | 4  | 4  | 7.5% | 102534 |
| <a href="#">[View Peptides]</a> | <a href="#">THRAP3</a>      | thyroid hormone receptor associated protein 3                                                       | 7  | 10 | 7.5% | 108694 |
| <a href="#">[View Peptides]</a> | <a href="#">WDR33</a>       | WD repeat domain 33                                                                                 | 5  | 5  | 7.5% | 145921 |
| <a href="#">[View Peptides]</a> | <a href="#">PSMC2</a>       | proteasome (prosome, macropain) 26S subunit, ATPase, 2                                              | 2  | 2  | 7.4% | 48634  |
| <a href="#">[View Peptides]</a> | <a href="#">LYAR</a>        | Ly1 antibody reactive homolog (mouse)                                                               | 2  | 2  | 7.4% | 43615  |
| <a href="#">[View Peptides]</a> | <a href="#">DNM1L</a>       | dynamamin 1-like                                                                                    | 3  | 4  | 7.3% | 81891  |
| <a href="#">[View Peptides]</a> | <a href="#">SHMT1</a>       | serine hydroxymethyltransferase 1 (soluble)                                                         | 2  | 2  | 7.2% | 53083  |
| <a href="#">[View Peptides]</a> | <a href="#">SNX9</a>        | sorting nexin 9                                                                                     | 2  | 2  | 7.2% | 66592  |
| <a href="#">[View Peptides]</a> | <a href="#">CALD1</a>       | caldesmon 1                                                                                         | 4  | 5  | 7.2% | 93250  |
| <a href="#">[View Peptides]</a> | <a href="#">MATR3</a>       | matrin 3                                                                                            | 3  | 7  | 7.2% | 94623  |
| <a href="#">[View Peptides]</a> | <a href="#">TLN1</a>        | talin 1                                                                                             | 9  | 9  | 7.2% | 269715 |
| <a href="#">[View Peptides]</a> | <a href="#">THOC2</a>       | THO complex 2                                                                                       | 8  | 11 | 7.1% | 169581 |
| <a href="#">[View Peptides]</a> | <a href="#">MTA1</a>        | metastasis associated 1                                                                             | 3  | 4  | 7.1% | 80788  |
| <a href="#">[View Peptides]</a> | <a href="#">ANAPC7</a>      | anaphase promoting complex subunit 7                                                                | 3  | 3  | 7.1% | 63161  |
| <a href="#">[View Peptides]</a> | <a href="#">PSD3, PSMD3</a> | proteasome (prosome, macropain) 26S subunit, non-ATPase, 3, pleckstrin and Sec7 domain containing 3 | 3  | 3  | 7.1% | 60978  |
| <a href="#">[View Peptides]</a> | <a href="#">TUFM</a>        | Tu translation elongation factor, mitochondrial                                                     | 2  | 2  | 7.1% | 49542  |
| <a href="#">[View Peptides]</a> | <a href="#">TERF2IP</a>     | telomeric repeat binding factor 2, interacting protein                                              | 2  | 2  | 7.0% | 44260  |
| <a href="#">[View Peptides]</a> | <a href="#">MPHOSPH10</a>   | M-phase phosphoprotein 10 (U3 small nucleolar ribonucleoprotein)                                    | 2  | 2  | 7.0% | 78864  |
| <a href="#">[View Peptides]</a> | <a href="#">APEH</a>        | N-acylaminoacyl-peptide hydrolase                                                                   | 3  | 3  | 7.0% | 81225  |
| <a href="#">[View Peptides]</a> | <a href="#">BCLAF1</a>      | BCL2-associated transcription factor 1                                                              | 4  | 7  | 7.0% | 106122 |
| <a href="#">[View Peptides]</a> | <a href="#">HEATR1</a>      | HEAT repeat containing 1                                                                            | 10 | 16 | 7.0% | 242368 |
| <a href="#">[View Peptides]</a> | <a href="#">DIS3</a>        | DIS3 mitotic control homolog (S. cerevisiae)                                                        | 4  | 7  | 6.9% | 109003 |
| <a href="#">[View Peptides]</a> | <a href="#">UBTF</a>        | upstream binding transcription factor, RNA polymerase I                                             | 4  | 8  | 6.9% | 89406  |
| <a href="#">[View Peptides]</a> | <a href="#">UAP1</a>        | UDP-N-acetylglucosamine pyrophosphorylase 1                                                         | 2  | 2  | 6.9% | 58769  |

|                                 |                          |                                                                                                      |   |    |      |        |
|---------------------------------|--------------------------|------------------------------------------------------------------------------------------------------|---|----|------|--------|
| <a href="#">[View Peptides]</a> | <a href="#">PSMA1</a>    | proteasome (prosome, macropain) subunit, alpha type, 1                                               | 2 | 2  | 6.8% | 29556  |
| <a href="#">[View Peptides]</a> | <a href="#">IK</a>       | IK cytokine, down-regulator of HLA II                                                                | 2 | 4  | 6.8% | 65630  |
| <a href="#">[View Peptides]</a> | <a href="#">ORC3L</a>    | origin recognition complex, subunit 3-like (yeast)                                                   | 3 | 3  | 6.8% | 82254  |
| <a href="#">[View Peptides]</a> | <a href="#">CLTC</a>     | clathrin, heavy chain (Hc)                                                                           | 6 | 11 | 6.8% | 191613 |
| <a href="#">[View Peptides]</a> | <a href="#">RRP1</a>     | ribosomal RNA processing 1 homolog (S. cerevisiae)                                                   | 2 | 2  | 6.7% | 52839  |
| <a href="#">[View Peptides]</a> | <a href="#">NMT1</a>     | N-myristoyltransferase 1                                                                             | 2 | 4  | 6.7% | 56806  |
| <a href="#">[View Peptides]</a> | <a href="#">PNN</a>      | pinin, desmosome associated protein                                                                  | 3 | 5  | 6.7% | 81614  |
| <a href="#">[View Peptides]</a> | <a href="#">WDR75</a>    | WD repeat domain 75                                                                                  | 4 | 5  | 6.7% | 94499  |
| <a href="#">[View Peptides]</a> | <a href="#">MCM2</a>     | minichromosome maintenance complex component 2                                                       | 3 | 3  | 6.7% | 101896 |
| <a href="#">[View Peptides]</a> | <a href="#">IPO9</a>     | importin 9                                                                                           | 4 | 4  | 6.7% | 115963 |
| <a href="#">[View Peptides]</a> | <a href="#">PRMT1</a>    | protein arginine methyltransferase 1                                                                 | 2 | 2  | 6.6% | 41486  |
| <a href="#">[View Peptides]</a> | <a href="#">ACTR2</a>    | ARP2 actin-related protein 2 homolog (yeast)                                                         | 2 | 3  | 6.6% | 44761  |
| <a href="#">[View Peptides]</a> | <a href="#">BLMH</a>     | bleomycin hydrolase                                                                                  | 2 | 2  | 6.6% | 52562  |
| <a href="#">[View Peptides]</a> | <a href="#">SFERS11</a>  | splicing factor, arginine/serine-rich 11                                                             | 2 | 6  | 6.6% | 53542  |
| <a href="#">[View Peptides]</a> | <a href="#">CHAF1B</a>   | chromatin assembly factor 1, subunit B (p60)                                                         | 2 | 2  | 6.6% | 61493  |
| <a href="#">[View Peptides]</a> | <a href="#">STIP1</a>    | stress-induced-phosphoprotein 1 (Hsp70/Hsp90-organizing protein)                                     | 2 | 2  | 6.6% | 62639  |
| <a href="#">[View Peptides]</a> | <a href="#">SSRP1</a>    | structure specific recognition protein 1                                                             | 3 | 4  | 6.6% | 81075  |
| <a href="#">[View Peptides]</a> | <a href="#">TOP3B</a>    | topoisomerase (DNA) III beta                                                                         | 3 | 5  | 6.6% | 96662  |
| <a href="#">[View Peptides]</a> | <a href="#">COPA</a>     | coatamer protein complex, subunit alpha                                                              | 5 | 5  | 6.6% | 138331 |
| <a href="#">[View Peptides]</a> | <a href="#">HDLBP</a>    | high density lipoprotein binding protein (vigilin)                                                   | 4 | 4  | 6.6% | 141439 |
| <a href="#">[View Peptides]</a> | <a href="#">BLM</a>      | Bloom syndrome                                                                                       | 6 | 6  | 6.6% | 159000 |
| <a href="#">[View Peptides]</a> | <a href="#">NMT2</a>     | N-myristoyltransferase 2                                                                             | 2 | 4  | 6.6% | 56980  |
| <a href="#">[View Peptides]</a> | <a href="#">POLE2</a>    | polymerase (DNA directed), epsilon 2 (p59 subunit)                                                   | 2 | 3  | 6.5% | 59537  |
| <a href="#">[View Peptides]</a> | <a href="#">ATP5A1</a>   | ATP synthase, H <sup>+</sup> transporting, mitochondrial F1 complex, alpha subunit 1, cardiac muscle | 2 | 3  | 6.5% | 59751  |
| <a href="#">[View Peptides]</a> | <a href="#">PFKM</a>     | phosphofructokinase, muscle                                                                          | 3 | 4  | 6.5% | 85182  |
| <a href="#">[View Peptides]</a> | <a href="#">RBM25</a>    | RNA binding motif protein 25                                                                         | 3 | 4  | 6.5% | 94122  |
| <a href="#">[View Peptides]</a> | <a href="#">GMIP</a>     | GEM interacting protein                                                                              | 4 | 6  | 6.5% | 106733 |
| <a href="#">[View Peptides]</a> | <a href="#">PAFAH1B1</a> | platelet-activating factor acetylhydrolase, isoform Ib, alpha subunit 45kDa                          | 2 | 3  | 6.3% | 46638  |
| <a href="#">[View Peptides]</a> | <a href="#">KRT13</a>    | keratin 13                                                                                           | 2 | 2  | 6.3% | 49586  |
| <a href="#">[View Peptides]</a> | <a href="#">C6orf182</a> | chromosome 6 open reading frame 182                                                                  | 2 | 2  | 6.3% | 53649  |
| <a href="#">[View Peptides]</a> | <a href="#">IFIT3</a>    | interferon-induced protein with tetratricopeptide repeats 3                                          | 2 | 3  | 6.3% | 55985  |
| <a href="#">[View Peptides]</a> | <a href="#">WDR1</a>     | WD repeat domain 1                                                                                   | 2 | 5  | 6.3% | 66194  |
| <a href="#">[View Peptides]</a> | <a href="#">XRCC1</a>    | X-ray repair complementing defective repair in Chinese hamster cells 1                               | 3 | 7  | 6.3% | 69526  |
| <a href="#">[View Peptides]</a> | <a href="#">POR</a>      | P450 (cytochrome) oxidoreductase                                                                     | 2 | 2  | 6.2% | 76690  |
| <a href="#">[View Peptides]</a> | <a href="#">VRK1</a>     | vaccinia related kinase 1                                                                            | 2 | 4  | 6.1% | 45476  |

|                                 |                                     |                                                                                                         |   |    |      |        |
|---------------------------------|-------------------------------------|---------------------------------------------------------------------------------------------------------|---|----|------|--------|
| <a href="#">[View Peptides]</a> | <a href="#">PRMT5</a>               | protein arginine methyltransferase 5                                                                    | 3 | 4  | 6.1% | 72684  |
| <a href="#">[View Peptides]</a> | <a href="#">RARS</a>                | arginyl-tRNA synthetase                                                                                 | 2 | 2  | 6.1% | 75379  |
| <a href="#">[View Peptides]</a> | <a href="#">SMARCC2</a>             | SWI/SNF related, matrix associated, actin dependent regulator of chromatin, subfamily c, member 2       | 4 | 4  | 6.1% | 132879 |
| <a href="#">[View Peptides]</a> | <a href="#">GATAD2A</a>             | GATA zinc finger domain containing 2A                                                                   | 2 | 2  | 6.0% | 68063  |
| <a href="#">[View Peptides]</a> | <a href="#">SRP72</a>               | signal recognition particle 72kDa                                                                       | 2 | 2  | 6.0% | 74606  |
| <a href="#">[View Peptides]</a> | <a href="#">CPSF2</a>               | cleavage and polyadenylation specific factor 2, 100kDa                                                  | 3 | 4  | 6.0% | 88487  |
| <a href="#">[View Peptides]</a> | <a href="#">XPO4</a>                | exportin 4                                                                                              | 4 | 4  | 6.0% | 130139 |
| <a href="#">[View Peptides]</a> | <a href="#">PPP1R12A</a>            | protein phosphatase 1, regulatory (inhibitor) subunit 12A                                               | 4 | 4  | 5.9% | 115281 |
| <a href="#">[View Peptides]</a> | <a href="#">MTA3</a>                | metastasis associated 1 family, member 3                                                                | 2 | 3  | 5.9% | 67504  |
| <a href="#">[View Peptides]</a> | <a href="#">PACIN2</a>              | protein kinase C and casein kinase substrate in neurons 2                                               | 2 | 2  | 5.8% | 55739  |
| <a href="#">[View Peptides]</a> | <a href="#">TBL3</a>                | transducin (beta)-like 3                                                                                | 2 | 4  | 5.8% | 56047  |
| <a href="#">[View Peptides]</a> | <a href="#">PLK1</a>                | polo-like kinase 1 (Drosophila)                                                                         | 2 | 2  | 5.8% | 68255  |
| <a href="#">[View Peptides]</a> | <a href="#">GTPBP4</a>              | GTP binding protein 4                                                                                   | 3 | 3  | 5.8% | 73965  |
| <a href="#">[View Peptides]</a> | <a href="#">MDC1</a>                | mediator of DNA damage checkpoint 1                                                                     | 6 | 6  | 5.8% | 226664 |
| <a href="#">[View Peptides]</a> | <a href="#">EIF5B</a>               | eukaryotic translation initiation factor 5B                                                             | 5 | 10 | 5.7% | 138799 |
| <a href="#">[View Peptides]</a> | <a href="#">UMPS</a>                | uridine monophosphate synthetase (orotate phosphoribosyl transferase and orotidine-5'-decarboxylase)    | 2 | 2  | 5.6% | 52222  |
| <a href="#">[View Peptides]</a> | <a href="#">gi 4758644, gi 3...</a> | gi 4758644 ref NP_004511.1  kinesin heavy chain member 2 [Homo sapiens], gi 3024057 sp O00139 KIF2_H... | 2 | 3  | 5.6% | 76927  |
| <a href="#">[View Peptides]</a> | <a href="#">MED24</a>               | mediator complex subunit 24                                                                             | 3 | 4  | 5.5% | 110305 |
| <a href="#">[View Peptides]</a> | <a href="#">PFKP</a>                | phosphofructokinase, platelet                                                                           | 2 | 3  | 5.5% | 85596  |
| <a href="#">[View Peptides]</a> | <a href="#">KRT16</a>               | keratin 16 (focal non-epidermolytic palmoplantar keratoderma)                                           | 2 | 7  | 5.5% | 51268  |
| <a href="#">[View Peptides]</a> | <a href="#">PPIA</a>                | peptidylprolyl isomerase A (cyclophilin A)                                                              | 2 | 2  | 5.5% | 18012  |
| <a href="#">[View Peptides]</a> | <a href="#">QPRT</a>                | quinolinate phosphoribosyltransferase (nicotinate-nucleotide pyrophosphorylase (carboxylating))         | 2 | 2  | 5.4% | 30816  |
| <a href="#">[View Peptides]</a> | <a href="#">SSB</a>                 | Sjogren syndrome antigen B (autoantigen La)                                                             | 2 | 3  | 5.4% | 46837  |
| <a href="#">[View Peptides]</a> | <a href="#">ACSL3</a>               | acyl-CoA synthetase long-chain family member 3                                                          | 2 | 2  | 5.4% | 80346  |
| <a href="#">[View Peptides]</a> | <a href="#">YARS</a>                | tyrosyl-tRNA synthetase                                                                                 | 2 | 2  | 5.3% | 59144  |
| <a href="#">[View Peptides]</a> | <a href="#">ATP6V1A</a>             | ATPase, H+ transporting, lysosomal 70kDa, V1 subunit A                                                  | 2 | 2  | 5.3% | 68304  |
| <a href="#">[View Peptides]</a> | <a href="#">PDCD6IP</a>             | programmed cell death 6 interacting protein                                                             | 3 | 3  | 5.3% | 96023  |
| <a href="#">[View Peptides]</a> | <a href="#">ADAR</a>                | adenosine deaminase, RNA-specific                                                                       | 3 | 3  | 5.3% | 135995 |
| <a href="#">[View Peptides]</a> | <a href="#">DSP</a>                 | desmoplakin                                                                                             | 8 | 11 | 5.2% | 331776 |
| <a href="#">[View Peptides]</a> | <a href="#">IPO7</a>                | importin 7                                                                                              | 3 | 4  | 5.2% | 119516 |
| <a href="#">[View Peptides]</a> | <a href="#">MKL1, RBM15</a>         | RNA binding motif protein 15, megakaryoblastic leukemia (translocation) 1                               | 3 | 3  | 5.2% | 107188 |

|                                 |                         |                                                                                                          |   |    |      |        |
|---------------------------------|-------------------------|----------------------------------------------------------------------------------------------------------|---|----|------|--------|
| <a href="#">[View Peptides]</a> | <a href="#">ABCF1</a>   | ATP-binding cassette, sub-family F (GCN20), member 1                                                     | 5 | 10 | 5.2% | 95926  |
| <a href="#">[View Peptides]</a> | <a href="#">IDH1</a>    | isocitrate dehydrogenase 1 (NADP+), soluble                                                              | 2 | 2  | 5.1% | 46659  |
| <a href="#">[View Peptides]</a> | <a href="#">KRT12</a>   | keratin 12 (Meesmann corneal dystrophy)                                                                  | 2 | 5  | 5.1% | 53511  |
| <a href="#">[View Peptides]</a> | <a href="#">CANX</a>    | calnexin                                                                                                 | 2 | 4  | 5.1% | 67568  |
| <a href="#">[View Peptides]</a> | <a href="#">SMARCC1</a> | SWI/SNF related, matrix associated, actin dependent regulator of chromatin, subfamily c, member 1        | 4 | 4  | 5.1% | 122753 |
| <a href="#">[View Peptides]</a> | <a href="#">PABPC1</a>  | poly(A) binding protein, cytoplasmic 1                                                                   | 2 | 3  | 5.0% | 70671  |
| <a href="#">[View Peptides]</a> | <a href="#">PABPC4</a>  | poly(A) binding protein, cytoplasmic 4 (inducible form)                                                  | 2 | 3  | 5.0% | 70783  |
| <a href="#">[View Peptides]</a> | <a href="#">ZBTB1</a>   | zinc finger and BTB domain containing 1                                                                  | 2 | 4  | 5.0% | 82016  |
| <a href="#">[View Peptides]</a> | <a href="#">ELMO2</a>   | engulfment and cell motility 2                                                                           | 2 | 2  | 5.0% | 82615  |
| <a href="#">[View Peptides]</a> | <a href="#">HMMR</a>    | hyaluronan-mediated motility receptor (RHAMM)                                                            | 2 | 2  | 5.0% | 84031  |
| <a href="#">[View Peptides]</a> | <a href="#">MYO1C</a>   | myosin IC                                                                                                | 3 | 3  | 5.0% | 118038 |
| <a href="#">[View Peptides]</a> | <a href="#">SMC1A</a>   | structural maintenance of chromosomes 1A                                                                 | 4 | 4  | 5.0% | 143233 |
| <a href="#">[View Peptides]</a> | <a href="#">PFAS</a>    | phosphoribosylformylglycinamide synthase (FGAR amidotransferase)                                         | 4 | 4  | 5.0% | 144664 |
| <a href="#">[View Peptides]</a> | <a href="#">KIF14</a>   | kinesin family member 14                                                                                 | 4 | 5  | 5.0% | 186490 |
| <a href="#">[View Peptides]</a> | <a href="#">PLS1</a>    | plastin 1 (I isoform)                                                                                    | 2 | 3  | 4.9% | 70353  |
| <a href="#">[View Peptides]</a> | <a href="#">CSTF3</a>   | cleavage stimulation factor, 3' pre-RNA, subunit 3, 77kDa                                                | 2 | 3  | 4.9% | 82922  |
| <a href="#">[View Peptides]</a> | <a href="#">RRM1</a>    | ribonucleotide reductase M1 polypeptide                                                                  | 2 | 2  | 4.9% | 90070  |
| <a href="#">[View Peptides]</a> | <a href="#">ZNF638</a>  | zinc finger protein 638                                                                                  | 5 | 7  | 4.8% | 220623 |
| <a href="#">[View Peptides]</a> | <a href="#">NCBP1</a>   | nuclear cap binding protein subunit 1, 80kDa                                                             | 2 | 3  | 4.8% | 91839  |
| <a href="#">[View Peptides]</a> | <a href="#">PLS3</a>    | plastin 3 (T isoform)                                                                                    | 2 | 3  | 4.8% | 70436  |
| <a href="#">[View Peptides]</a> | <a href="#">RPN1</a>    | ribophorin I                                                                                             | 2 | 2  | 4.8% | 68569  |
| <a href="#">[View Peptides]</a> | <a href="#">CAST</a>    | calpastatin                                                                                              | 2 | 3  | 4.7% | 76501  |
| <a href="#">[View Peptides]</a> | <a href="#">UHRF1</a>   | ubiquitin-like, containing PHD and RING finger domains, 1                                                | 2 | 2  | 4.7% | 89814  |
| <a href="#">[View Peptides]</a> | <a href="#">EPRS</a>    | glutamyl-prolyl-tRNA synthetase                                                                          | 4 | 4  | 4.7% | 163026 |
| <a href="#">[View Peptides]</a> | <a href="#">SNX2</a>    | sorting nexin 2                                                                                          | 2 | 2  | 4.6% | 58535  |
| <a href="#">[View Peptides]</a> | <a href="#">NPLOC4</a>  | nuclear protein localization 4 homolog (S. cerevisiae)                                                   | 2 | 4  | 4.6% | 68120  |
| <a href="#">[View Peptides]</a> | <a href="#">RBM14</a>   | RNA binding motif protein 14                                                                             | 2 | 2  | 4.6% | 69492  |
| <a href="#">[View Peptides]</a> | <a href="#">GAS2L3</a>  | growth arrest-specific 2 like 3                                                                          | 2 | 2  | 4.6% | 75214  |
| <a href="#">[View Peptides]</a> | <a href="#">THOP1</a>   | thimet oligopeptidase 1                                                                                  | 2 | 3  | 4.6% | 78840  |
| <a href="#">[View Peptides]</a> | <a href="#">COPB2</a>   | coatamer protein complex, subunit beta 2 (beta prime)                                                    | 2 | 3  | 4.6% | 102487 |
| <a href="#">[View Peptides]</a> | <a href="#">PRPF6</a>   | PRP6 pre-mRNA processing factor 6 homolog (S. cerevisiae)                                                | 3 | 6  | 4.6% | 106925 |
| <a href="#">[View Peptides]</a> | <a href="#">OGT</a>     | O-linked N-acetylglucosamine (GlcNAc) transferase (UDP-N-acetylglucosamine: polypeptide-N-acetylgluco... | 3 | 4  | 4.5% | 116924 |
| <a href="#">[View Peptides]</a> | <a href="#">TGM2</a>    | transglutaminase 2 (C polypeptide, protein-glutamine-gamma-glutamyltransferase)                          | 2 | 2  | 4.5% | 77329  |
| <a href="#">[View Peptides]</a> | <a href="#">TUBGCP3</a> | tubulin, gamma complex associated protein 3                                                              | 2 | 2  | 4.4% | 103571 |

|                                 |                          |                                                                                                   |   |    |      |        |
|---------------------------------|--------------------------|---------------------------------------------------------------------------------------------------|---|----|------|--------|
| <a href="#">[View Peptides]</a> | <a href="#">MCM3</a>     | minichromosome maintenance complex component 3                                                    | 2 | 3  | 4.3% | 90981  |
| <a href="#">[View Peptides]</a> | <a href="#">MCM8</a>     | minichromosome maintenance complex component 8                                                    | 2 | 2  | 4.3% | 93697  |
| <a href="#">[View Peptides]</a> | <a href="#">HK1</a>      | hexokinase 1                                                                                      | 2 | 2  | 4.3% | 102503 |
| <a href="#">[View Peptides]</a> | <a href="#">POLR1B</a>   | polymerase (RNA) I polypeptide B, 128kDa                                                          | 3 | 6  | 4.3% | 122138 |
| <a href="#">[View Peptides]</a> | <a href="#">POLR2B</a>   | polymerase (RNA) II (DNA directed) polypeptide B, 140kDa                                          | 3 | 4  | 4.3% | 133896 |
| <a href="#">[View Peptides]</a> | <a href="#">KIAA0664</a> | KIAA0664                                                                                          | 3 | 3  | 4.3% | 146669 |
| <a href="#">[View Peptides]</a> | <a href="#">EIF3A</a>    | eukaryotic translation initiation factor 3, subunit A                                             | 4 | 4  | 4.3% | 166569 |
| <a href="#">[View Peptides]</a> | <a href="#">TOPBP1</a>   | topoisomerase (DNA) II binding protein 1                                                          | 4 | 6  | 4.3% | 170677 |
| <a href="#">[View Peptides]</a> | <a href="#">MKI67</a>    | antigen identified by monoclonal antibody Ki-67                                                   | 9 | 12 | 4.3% | 358747 |
| <a href="#">[View Peptides]</a> | <a href="#">SEC23A</a>   | Sec23 homolog A ( <i>S. cerevisiae</i> )                                                          | 2 | 2  | 4.2% | 86147  |
| <a href="#">[View Peptides]</a> | <a href="#">PIIG</a>     | peptidylprolyl isomerase G (cyclophilin G)                                                        | 2 | 3  | 4.2% | 88618  |
| <a href="#">[View Peptides]</a> | <a href="#">MED16</a>    | mediator complex subunit 16                                                                       | 2 | 5  | 4.2% | 96793  |
| <a href="#">[View Peptides]</a> | <a href="#">SYMPK</a>    | symplekin                                                                                         | 3 | 5  | 4.2% | 141148 |
| <a href="#">[View Peptides]</a> | <a href="#">SIN3A</a>    | SIN3 homolog A, transcription regulator (yeast)                                                   | 3 | 3  | 4.2% | 145175 |
| <a href="#">[View Peptides]</a> | <a href="#">RTEL1</a>    | regulator of telomere elongation helicase 1                                                       | 3 | 5  | 4.1% | 152374 |
| <a href="#">[View Peptides]</a> | <a href="#">CDC2L2</a>   | cell division cycle 2-like 2 (PITSLRE proteins)                                                   | 2 | 4  | 4.1% | 91004  |
| <a href="#">[View Peptides]</a> | <a href="#">PPP1R10</a>  | protein phosphatase 1, regulatory (inhibitor) subunit 10                                          | 3 | 5  | 4.0% | 99058  |
| <a href="#">[View Peptides]</a> | <a href="#">SMARCA5</a>  | SWI/SNF related, matrix associated, actin dependent regulator of chromatin, subfamily a, member 5 | 3 | 3  | 4.0% | 121905 |
| <a href="#">[View Peptides]</a> | <a href="#">CDC2L1</a>   | cell division cycle 2-like 1 (PITSLRE proteins)                                                   | 2 | 4  | 4.0% | 92707  |
| <a href="#">[View Peptides]</a> | <a href="#">ACIN1</a>    | apoptotic chromatin condensation inducer 1                                                        | 3 | 5  | 3.9% | 151887 |
| <a href="#">[View Peptides]</a> | <a href="#">MARS</a>     | methionyl-tRNA synthetase                                                                         | 2 | 2  | 3.9% | 101116 |
| <a href="#">[View Peptides]</a> | <a href="#">COPG2</a>    | coatomer protein complex, subunit gamma 2                                                         | 2 | 2  | 3.9% | 97622  |
| <a href="#">[View Peptides]</a> | <a href="#">WDR43</a>    | WD repeat domain 43                                                                               | 2 | 2  | 3.8% | 79119  |
| <a href="#">[View Peptides]</a> | <a href="#">FGA</a>      | fibrinogen alpha chain                                                                            | 2 | 2  | 3.8% | 94973  |
| <a href="#">[View Peptides]</a> | <a href="#">DNM2</a>     | dynamain 2                                                                                        | 2 | 3  | 3.8% | 98064  |
| <a href="#">[View Peptides]</a> | <a href="#">NPEPPS</a>   | aminopeptidase puromycin sensitive                                                                | 2 | 2  | 3.8% | 103276 |
| <a href="#">[View Peptides]</a> | <a href="#">RIF1</a>     | RAP1 interacting factor homolog (yeast)                                                           | 6 | 6  | 3.8% | 274464 |
| <a href="#">[View Peptides]</a> | <a href="#">P4HB</a>     | procollagen-proline, 2-oxoglutarate 4-dioxygenase (proline 4-hydroxylase), beta polypeptide       | 2 | 2  | 3.7% | 57116  |
| <a href="#">[View Peptides]</a> | <a href="#">TRIM25</a>   | tripartite motif-containing 25                                                                    | 2 | 2  | 3.7% | 70990  |
| <a href="#">[View Peptides]</a> | <a href="#">AP3D1</a>    | adaptor-related protein complex 3, delta 1 subunit                                                | 2 | 3  | 3.7% | 130158 |
| <a href="#">[View Peptides]</a> | <a href="#">ZMYM3</a>    | zinc finger, MYM-type 3                                                                           | 3 | 3  | 3.7% | 152379 |
| <a href="#">[View Peptides]</a> | <a href="#">MSH6</a>     | mutS homolog 6 ( <i>E. coli</i> )                                                                 | 3 | 4  | 3.7% | 152785 |
| <a href="#">[View Peptides]</a> | <a href="#">GCN1L1</a>   | GCN1 general control of amino-acid synthesis 1-like 1 (yeast)                                     | 6 | 9  | 3.7% | 292742 |
| <a href="#">[View Peptides]</a> | <a href="#">CUL1</a>     | cullin 1                                                                                          | 2 | 2  | 3.6% | 89678  |
| <a href="#">[View Peptides]</a> | <a href="#">LARS</a>     | leucyl-tRNA synthetase                                                                            | 2 | 2  | 3.6% | 134466 |
| <a href="#">[View Peptides]</a> | <a href="#">NCAPD2</a>   | non-SMC condensin I complex, subunit D2                                                           | 2 | 5  | 3.6% | 157168 |

|                                 |                         |                                                                                                   |   |    |      |        |
|---------------------------------|-------------------------|---------------------------------------------------------------------------------------------------|---|----|------|--------|
| <a href="#">[View Peptides]</a> | <a href="#">POLE</a>    | polymerase (DNA directed), epsilon                                                                | 5 | 11 | 3.6% | 261529 |
| <a href="#">[View Peptides]</a> | <a href="#">CUL4A</a>   | cullin 4A                                                                                         | 2 | 2  | 3.5% | 76821  |
| <a href="#">[View Peptides]</a> | <a href="#">MARK3</a>   | MAP/microtubule affinity-regulating kinase 3                                                      | 2 | 2  | 3.5% | 86944  |
| <a href="#">[View Peptides]</a> | <a href="#">TFIP11</a>  | tuftelin interacting protein 11                                                                   | 2 | 2  | 3.5% | 96820  |
| <a href="#">[View Peptides]</a> | <a href="#">PSMD1</a>   | proteasome (prosome, macropain) 26S subunit, non-ATPase, 1                                        | 2 | 2  | 3.5% | 105836 |
| <a href="#">[View Peptides]</a> | <a href="#">XPO1</a>    | exportin 1 (CRM1 homolog, yeast)                                                                  | 2 | 2  | 3.5% | 123386 |
| <a href="#">[View Peptides]</a> | <a href="#">MED1</a>    | mediator complex subunit 1                                                                        | 3 | 3  | 3.5% | 168437 |
| <a href="#">[View Peptides]</a> | <a href="#">PRPF4B</a>  | PRP4 pre-mRNA processing factor 4 homolog B (yeast)                                               | 2 | 4  | 3.4% | 116973 |
| <a href="#">[View Peptides]</a> | <a href="#">STAG2</a>   | stromal antigen 2                                                                                 | 3 | 3  | 3.4% | 141326 |
| <a href="#">[View Peptides]</a> | <a href="#">FLII</a>    | flightless I homolog (Drosophila)                                                                 | 2 | 2  | 3.4% | 144751 |
| <a href="#">[View Peptides]</a> | <a href="#">MARK2</a>   | MAP/microtubule affinity-regulating kinase 2                                                      | 2 | 2  | 3.4% | 87911  |
| <a href="#">[View Peptides]</a> | <a href="#">EIF3C</a>   | eukaryotic translation initiation factor 3, subunit C                                             | 2 | 3  | 3.3% | 105344 |
| <a href="#">[View Peptides]</a> | <a href="#">YTHDF2</a>  | YTH domain family, member 2                                                                       | 2 | 2  | 3.3% | 62334  |
| <a href="#">[View Peptides]</a> | <a href="#">RBM10</a>   | RNA binding motif protein 10                                                                      | 2 | 2  | 3.2% | 103459 |
| <a href="#">[View Peptides]</a> | <a href="#">MSH2</a>    | mutS homolog 2, colon cancer, nonpolyposis type 1 (E. coli)                                       | 2 | 4  | 3.2% | 104743 |
| <a href="#">[View Peptides]</a> | <a href="#">USP7</a>    | ubiquitin specific peptidase 7 (herpes virus-associated)                                          | 2 | 3  | 3.2% | 128272 |
| <a href="#">[View Peptides]</a> | <a href="#">CRKRS</a>   | Cdc2-related kinase, arginine/serine-rich                                                         | 3 | 6  | 3.2% | 164154 |
| <a href="#">[View Peptides]</a> | <a href="#">DCTN1</a>   | dynactin 1 (p150, glued homolog, Drosophila)                                                      | 2 | 2  | 3.1% | 141694 |
| <a href="#">[View Peptides]</a> | <a href="#">PLCB3</a>   | phospholipase C, beta 3 (phosphatidylinositol-specific)                                           | 2 | 3  | 3.1% | 138799 |
| <a href="#">[View Peptides]</a> | <a href="#">VCL</a>     | vinculin                                                                                          | 2 | 3  | 3.1% | 123799 |
| <a href="#">[View Peptides]</a> | <a href="#">UPF1</a>    | UPF1 regulator of nonsense transcripts homolog (yeast)                                            | 2 | 2  | 3.0% | 124345 |
| <a href="#">[View Peptides]</a> | <a href="#">SEC24C</a>  | SEC24 related gene family, member C (S. cerevisiae)                                               | 2 | 2  | 3.0% | 118315 |
| <a href="#">[View Peptides]</a> | <a href="#">GTF3C2</a>  | general transcription factor IIIC, polypeptide 2, beta 110kDa                                     | 2 | 2  | 2.9% | 100680 |
| <a href="#">[View Peptides]</a> | <a href="#">SMARCA4</a> | SWI/SNF related, matrix associated, actin dependent regulator of chromatin, subfamily a, member 4 | 4 | 5  | 2.9% | 184585 |
| <a href="#">[View Peptides]</a> | <a href="#">MLLT4</a>   | myeloid/lymphoid or mixed-lineage leukemia (trithorax homolog, Drosophila); translocated to, 4    | 3 | 3  | 2.9% | 205604 |
| <a href="#">[View Peptides]</a> | <a href="#">HCFC1</a>   | host cell factor C1 (VP16-accessory protein)                                                      | 4 | 4  | 2.9% | 208840 |
| <a href="#">[View Peptides]</a> | <a href="#">CHD7</a>    | chromodomain helicase DNA binding protein 7                                                       | 4 | 4  | 2.9% | 252482 |
| <a href="#">[View Peptides]</a> | <a href="#">LARP1</a>   | La ribonucleoprotein domain family, member 1                                                      | 2 | 2  | 2.7% | 123510 |
| <a href="#">[View Peptides]</a> | <a href="#">KIF5B</a>   | kinesin family member 5B                                                                          | 2 | 2  | 2.6% | 109685 |
| <a href="#">[View Peptides]</a> | <a href="#">STAG1</a>   | stromal antigen 1                                                                                 | 2 | 2  | 2.6% | 144445 |
| <a href="#">[View Peptides]</a> | <a href="#">POGZ</a>    | pogo transposable element with ZNF domain                                                         | 2 | 3  | 2.6% | 155269 |
| <a href="#">[View Peptides]</a> | <a href="#">CHD8</a>    | chromodomain helicase DNA binding protein 8                                                       | 3 | 4  | 2.6% | 230356 |
| <a href="#">[View Peptides]</a> | <a href="#">CAD</a>     | carbamoyl-phosphate synthetase 2, aspartate transcarbamylase, and dihydroorotase                  | 3 | 3  | 2.6% | 242981 |
| <a href="#">[View Peptides]</a> | <a href="#">NIPBL</a>   | Nipped-B homolog (Drosophila)                                                                     | 4 | 6  | 2.5% | 316051 |
| <a href="#">[View Peptides]</a> | <a href="#">SUPT6H</a>  | suppressor of Ty 6 homolog (S. cerevisiae)                                                        | 2 | 2  | 2.4% | 199071 |

|                                 |                                          |                                                                                                         |   |   |      |        |
|---------------------------------|------------------------------------------|---------------------------------------------------------------------------------------------------------|---|---|------|--------|
| <a href="#">[View Peptides]</a> | <a href="#">GEMIN5</a>                   | gem (nuclear organelle) associated protein 5                                                            | 2 | 3 | 2.4% | 168560 |
| <a href="#">[View Peptides]</a> | <a href="#">KIF4A</a>                    | kinesin family member 4A                                                                                | 2 | 2 | 2.4% | 139881 |
| <a href="#">[View Peptides]</a> | <a href="#">NUMA1</a>                    | nuclear mitotic apparatus protein 1                                                                     | 3 | 3 | 2.3% | 238272 |
| <a href="#">[View Peptides]</a> | <a href="#">DYNC1H1</a>                  | dynein, cytoplasmic 1, heavy chain 1                                                                    | 6 | 9 | 2.3% | 532412 |
| <a href="#">[View Peptides]</a> | <a href="#">gi 300300,<br/>gi 729094</a> | sp P39880 CUT1_HUMAN CCAAT displacement protein (CDP) (Cut-like 1) , gi 300300 gb AAB26579.1  CCAAT ... | 2 | 2 | 2.2% | 164353 |
| <a href="#">[View Peptides]</a> | <a href="#">LMO7</a>                     | LIM domain 7                                                                                            | 2 | 2 | 2.1% | 192708 |
| <a href="#">[View Peptides]</a> | <a href="#">PBRM1</a>                    | polybromo 1                                                                                             | 2 | 2 | 2.1% | 192946 |
| <a href="#">[View Peptides]</a> | <a href="#">YLPM1</a>                    | YLP motif containing 1                                                                                  | 2 | 2 | 2.1% | 219983 |
| <a href="#">[View Peptides]</a> | <a href="#">BAT2</a>                     | HLA-B associated transcript 2                                                                           | 2 | 2 | 2.1% | 228858 |
| <a href="#">[View Peptides]</a> | <a href="#">PHF3</a>                     | PHD finger protein 3                                                                                    | 2 | 4 | 2.1% | 229479 |
| <a href="#">[View Peptides]</a> | <a href="#">PDCD11</a>                   | programmed cell death 11                                                                                | 2 | 2 | 2.0% | 208733 |
| <a href="#">[View Peptides]</a> | <a href="#">EPPK1</a>                    | epiplakin 1                                                                                             | 5 | 6 | 1.8% | 553102 |
| <a href="#">[View Peptides]</a> | <a href="#">RRBP1</a>                    | ribosome binding protein 1 homolog 180kDa (dog)                                                         | 2 | 4 | 1.8% | 152472 |
| <a href="#">[View Peptides]</a> | <a href="#">OAS3</a>                     | 2'-5'-oligoadenylate synthetase 3, 100kDa                                                               | 2 | 2 | 1.8% | 121165 |
| <a href="#">[View Peptides]</a> | <a href="#">MED13</a>                    | mediator complex subunit 13                                                                             | 2 | 2 | 1.7% | 239229 |
| <a href="#">[View Peptides]</a> | <a href="#">NCOR1</a>                    | nuclear receptor co-repressor 1                                                                         | 2 | 2 | 1.7% | 270207 |
| <a href="#">[View Peptides]</a> | <a href="#">PCF11</a>                    | PCF11, cleavage and polyadenylation factor subunit, homolog (S. cerevisiae)                             | 2 | 2 | 1.6% | 183980 |
| <a href="#">[View Peptides]</a> | <a href="#">NHS</a>                      | Nance-Horan syndrome (congenital cataracts and dental anomalies)                                        | 2 | 2 | 1.6% | 176699 |
| <a href="#">[View Peptides]</a> | <a href="#">TRRAP</a>                    | transformation/transcription domain-associated protein                                                  | 3 | 3 | 1.3% | 437589 |
| <a href="#">[View Peptides]</a> | <a href="#">AHNAK</a>                    | AHNAK nucleoprotein                                                                                     | 2 | 2 | 1.1% | 312493 |
| <a href="#">[View Peptides]</a> | <a href="#">PLEC1</a>                    | plectin 1, intermediate filament binding protein 500kDa                                                 | 3 | 4 | 1.0% | 531742 |
| <a href="#">[View Peptides]</a> | <a href="#">CHD6</a>                     | chromodomain helicase DNA binding protein 6                                                             | 2 | 2 | 0.9% | 305412 |
| <a href="#">[View Peptides]</a> | <a href="#">RYR2</a>                     | ryanodine receptor 2 (cardiac)                                                                          | 2 | 2 | 0.8% | 564506 |
| <a href="#">[View Peptides]</a> | <a href="#">MDN1</a>                     | MDN1, midasin homolog (yeast)                                                                           | 2 | 2 | 0.6% | 632827 |
